# Supplementary material
Source: PubMed Central journal article supplement (PMC3891048)

## **New Effective Inhibitors of the Abelson Kinase**

**George A. Kraus<sup>a, \*</sup>, Vinayak Gupta<sup>a</sup>, Marjan Mokhtarian<sup>b</sup>, Samir Mehanovic<sup>b</sup> and Marit Nilsen-Hamilton<sup>c</sup>**

*a Department of Chemistry, Iowa State University, Ames, IA 50011*

*b Molecular Express Inc., Ames, IA 50014*

*c Department of Biochemistry, Biophysics and Molecular Biology, Iowa State University, Ames, IA 50010*

**Supporting information: <sup>1</sup>H-NMR and <sup>13</sup>C-NMR of compounds**

*\* Corresponding author. Tel. +1 515 294 7794; fax: +1 515 294 0105.*

*E-mail address: gakraus@iastate.edu (G.A. Kraus).*

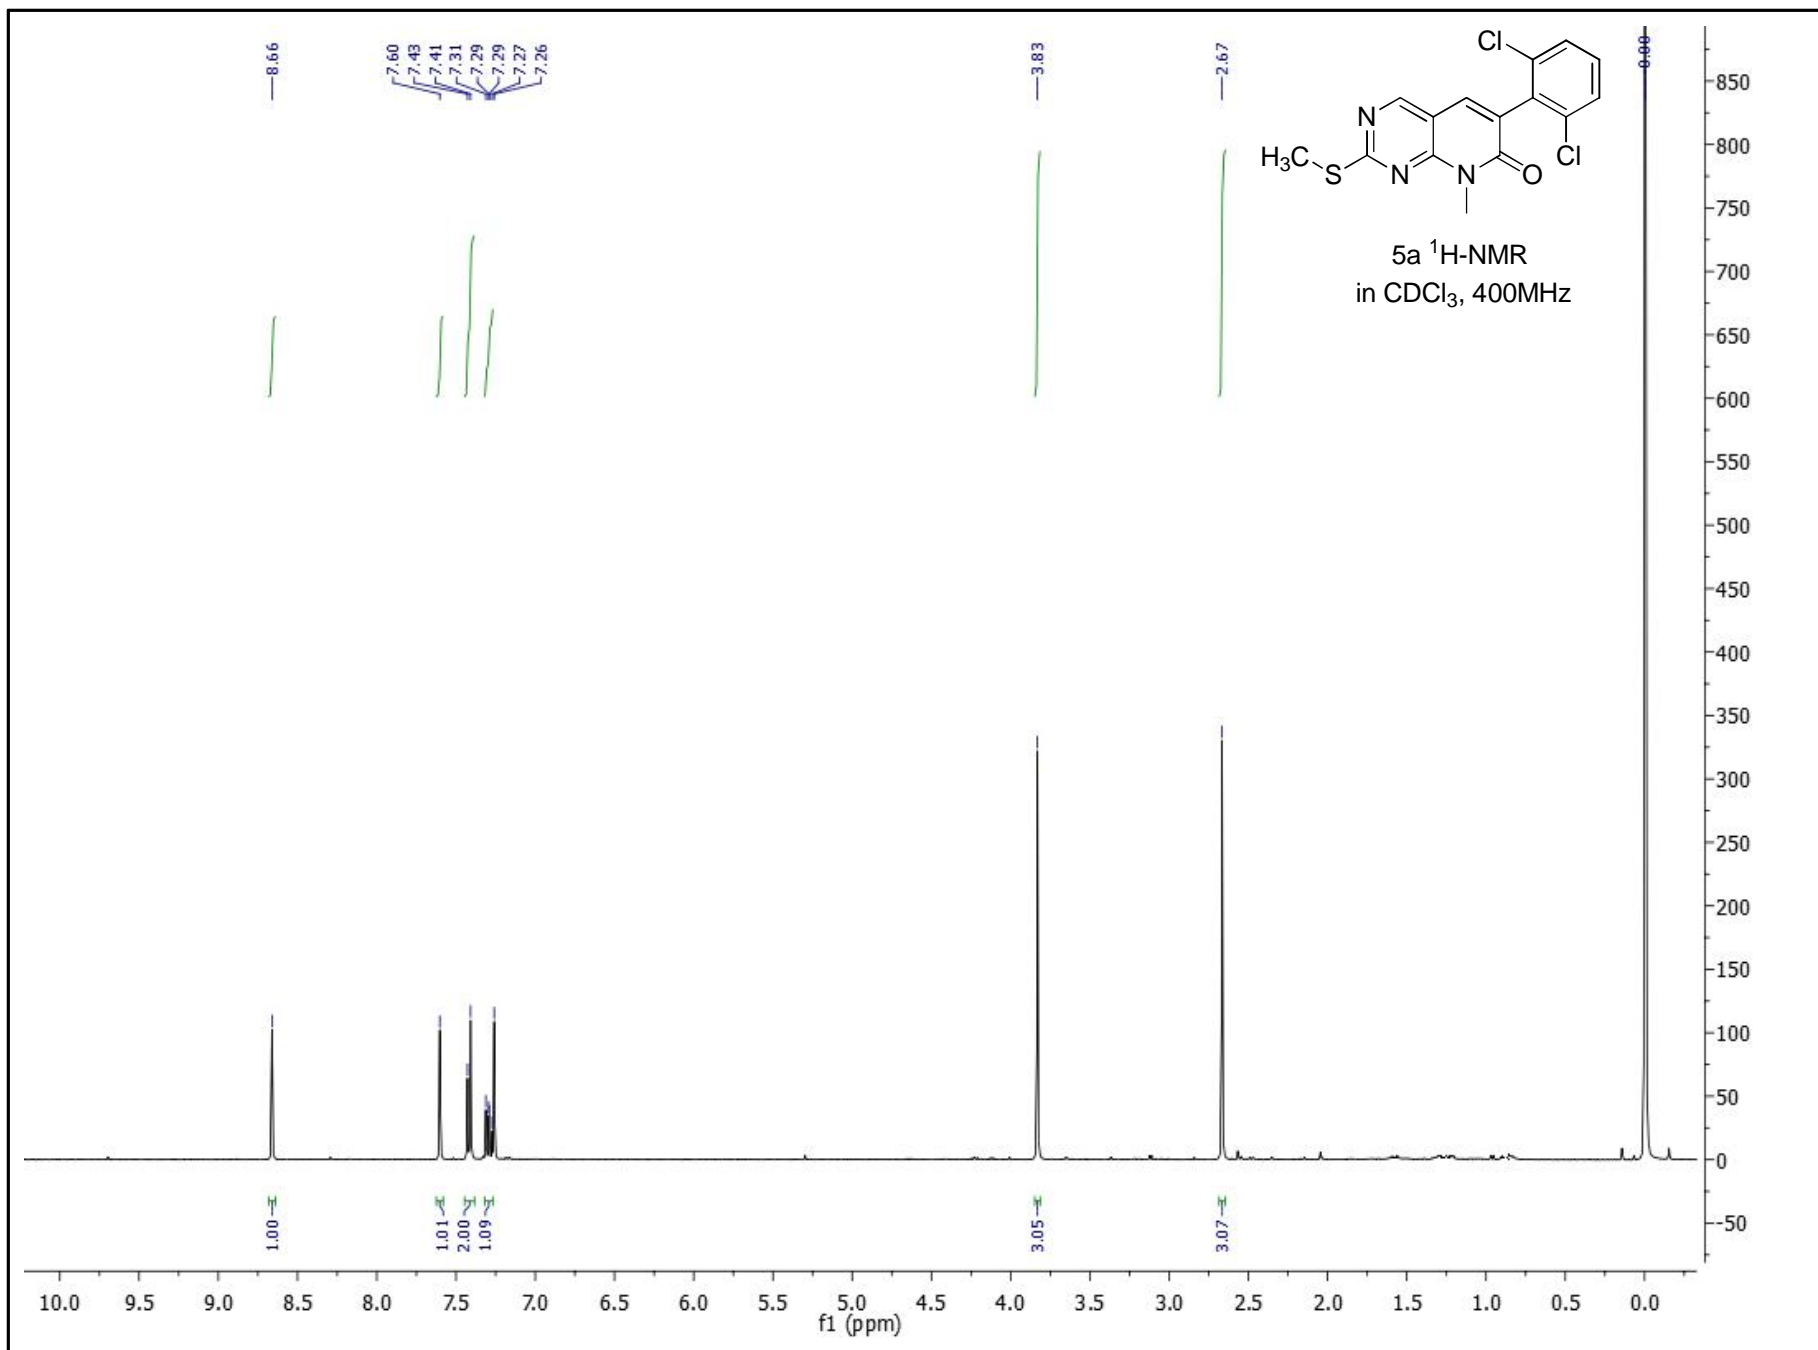

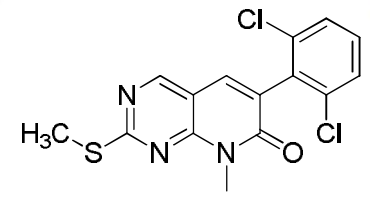

5a <sup>13</sup>C-NMR  
in CDCl<sub>3</sub>, 100MHz

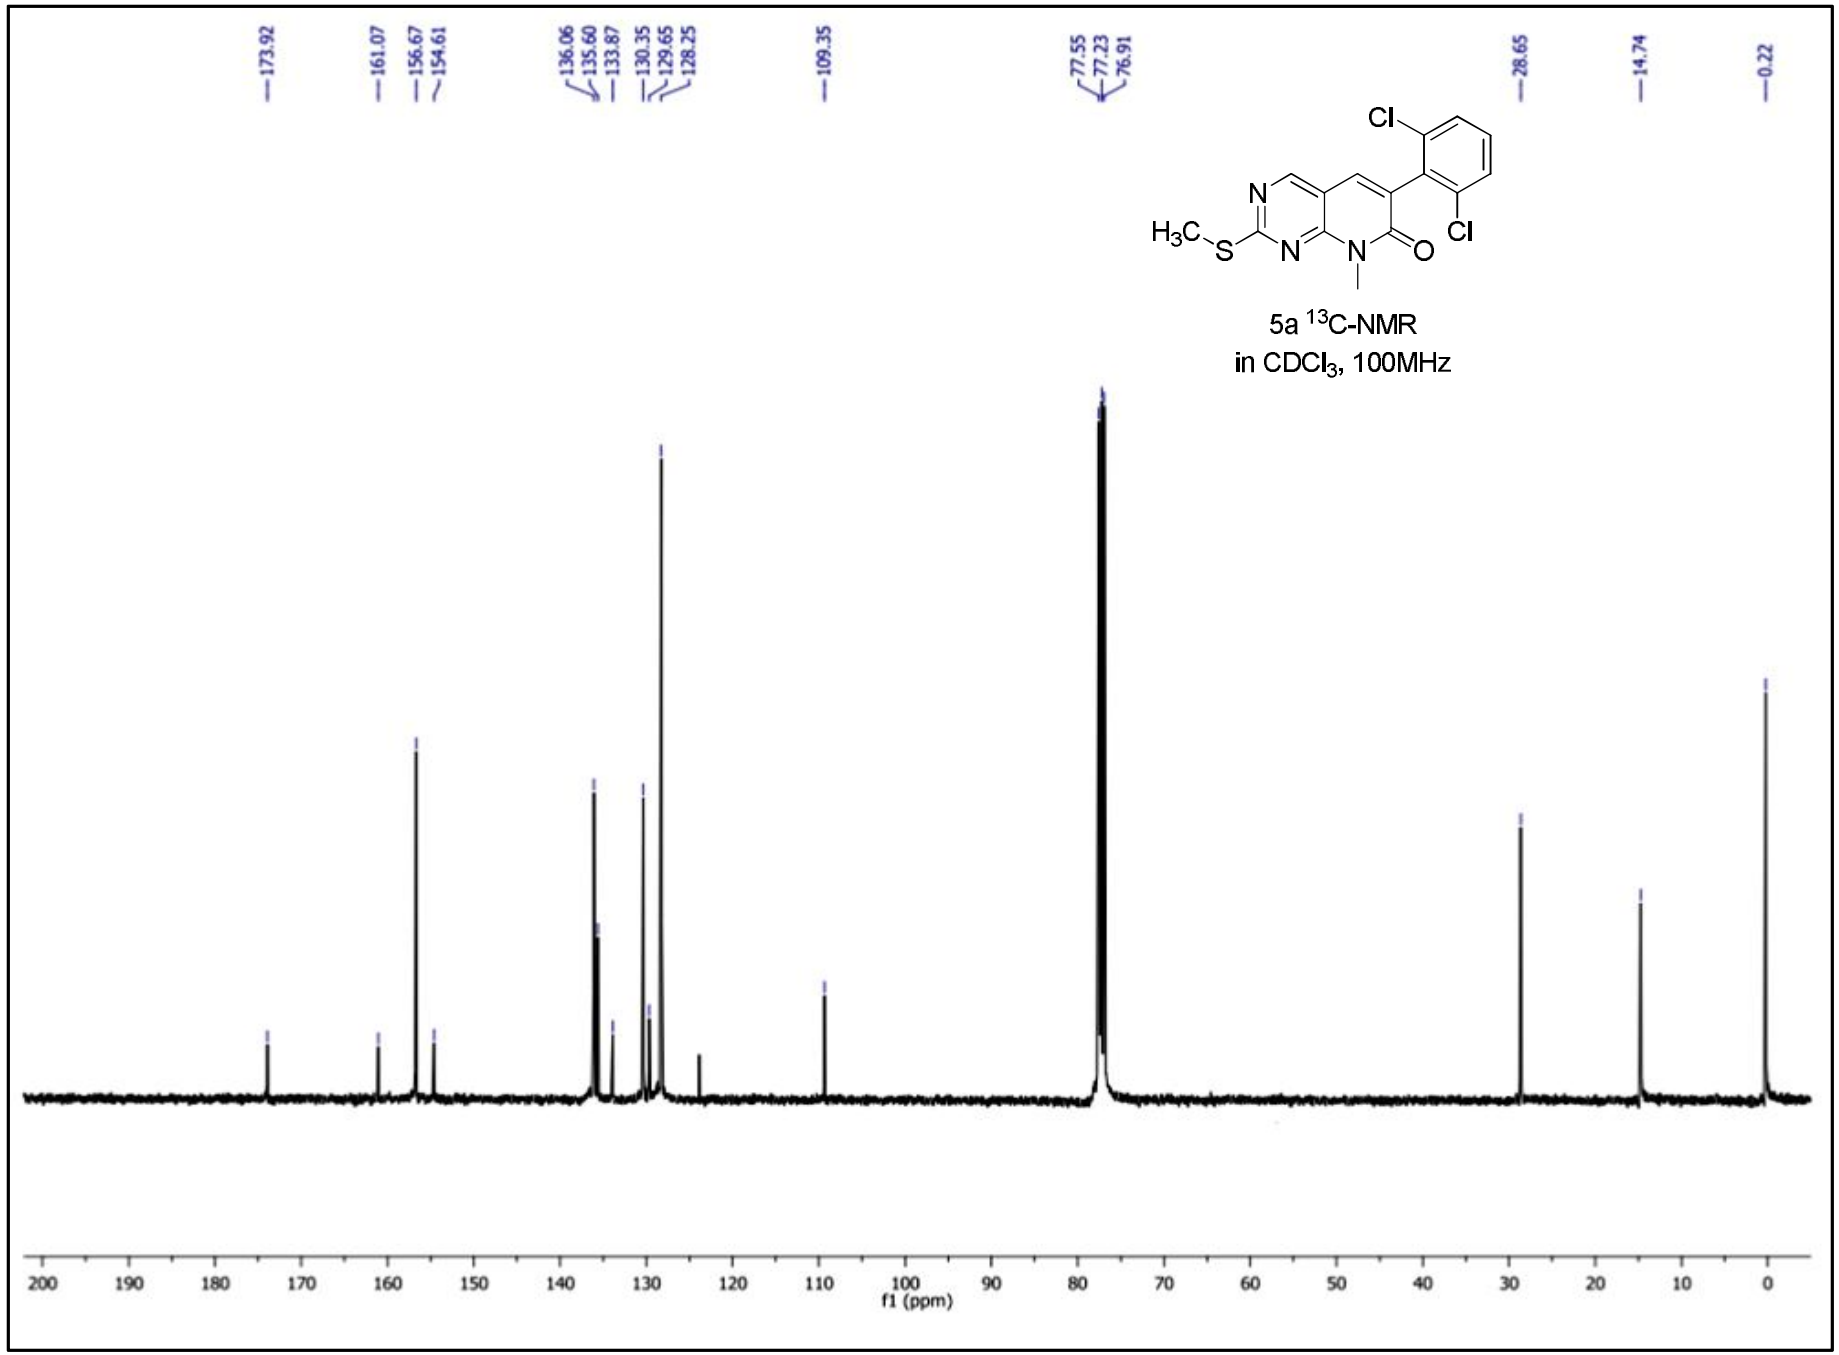

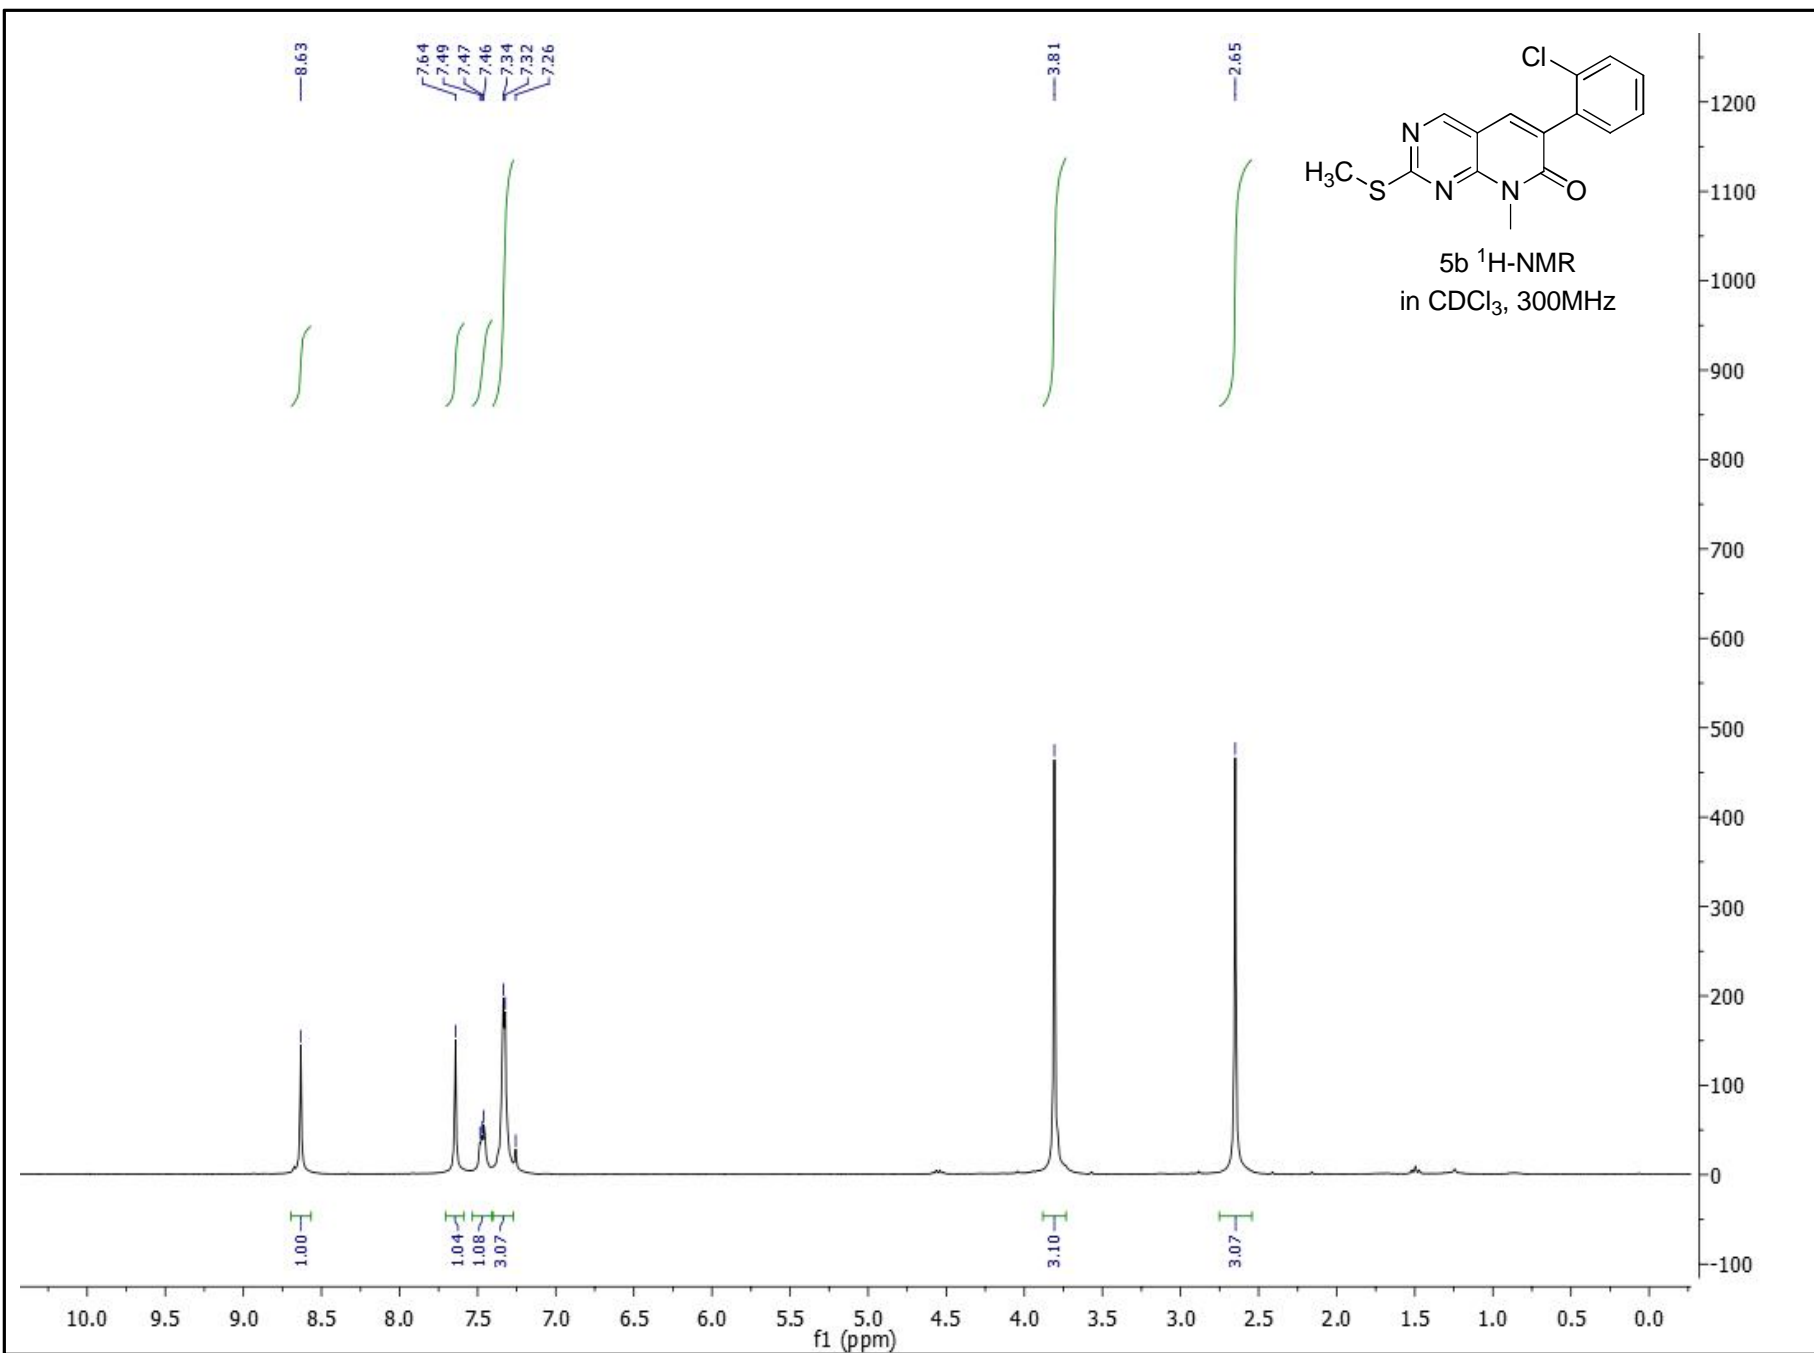

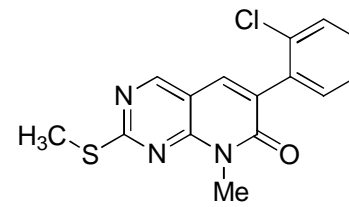

5b <sup>13</sup>C-NMR  
in CDCl<sub>3</sub>, 100MHz

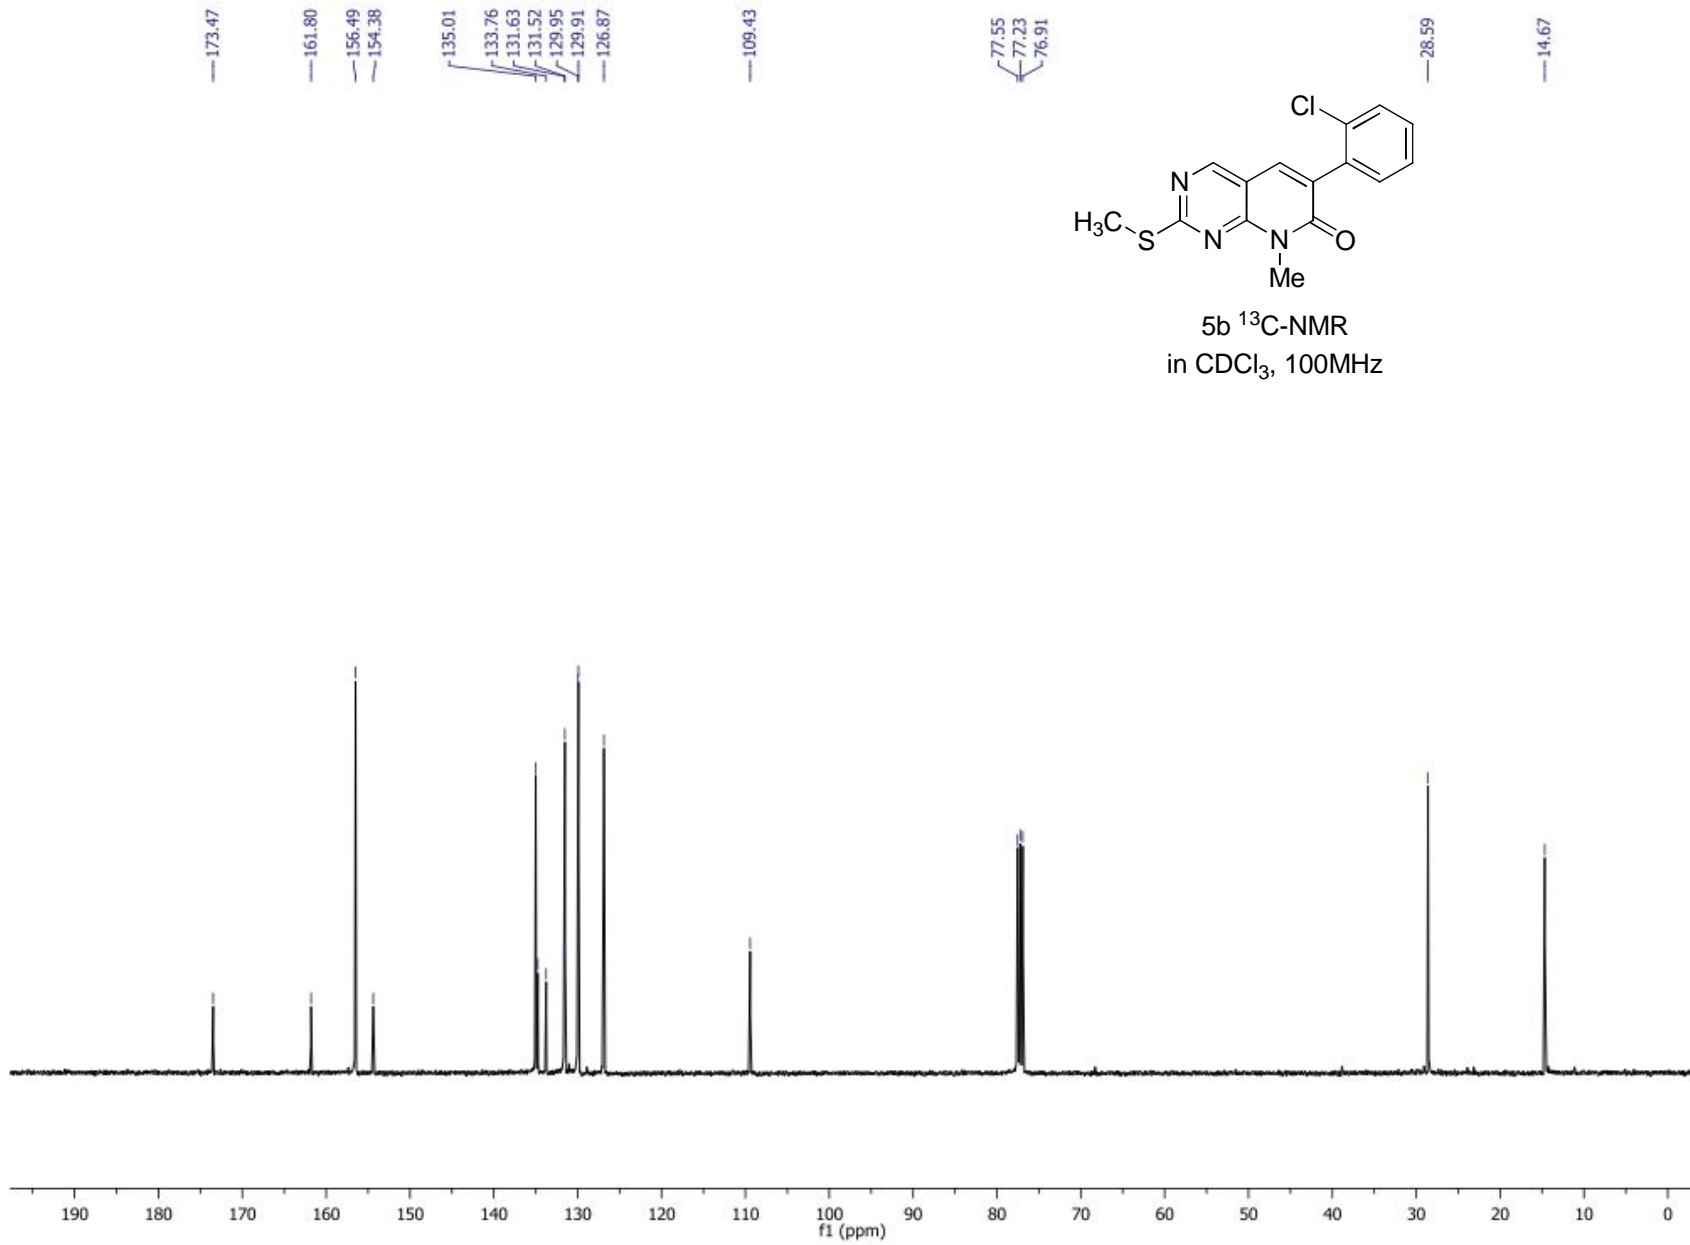

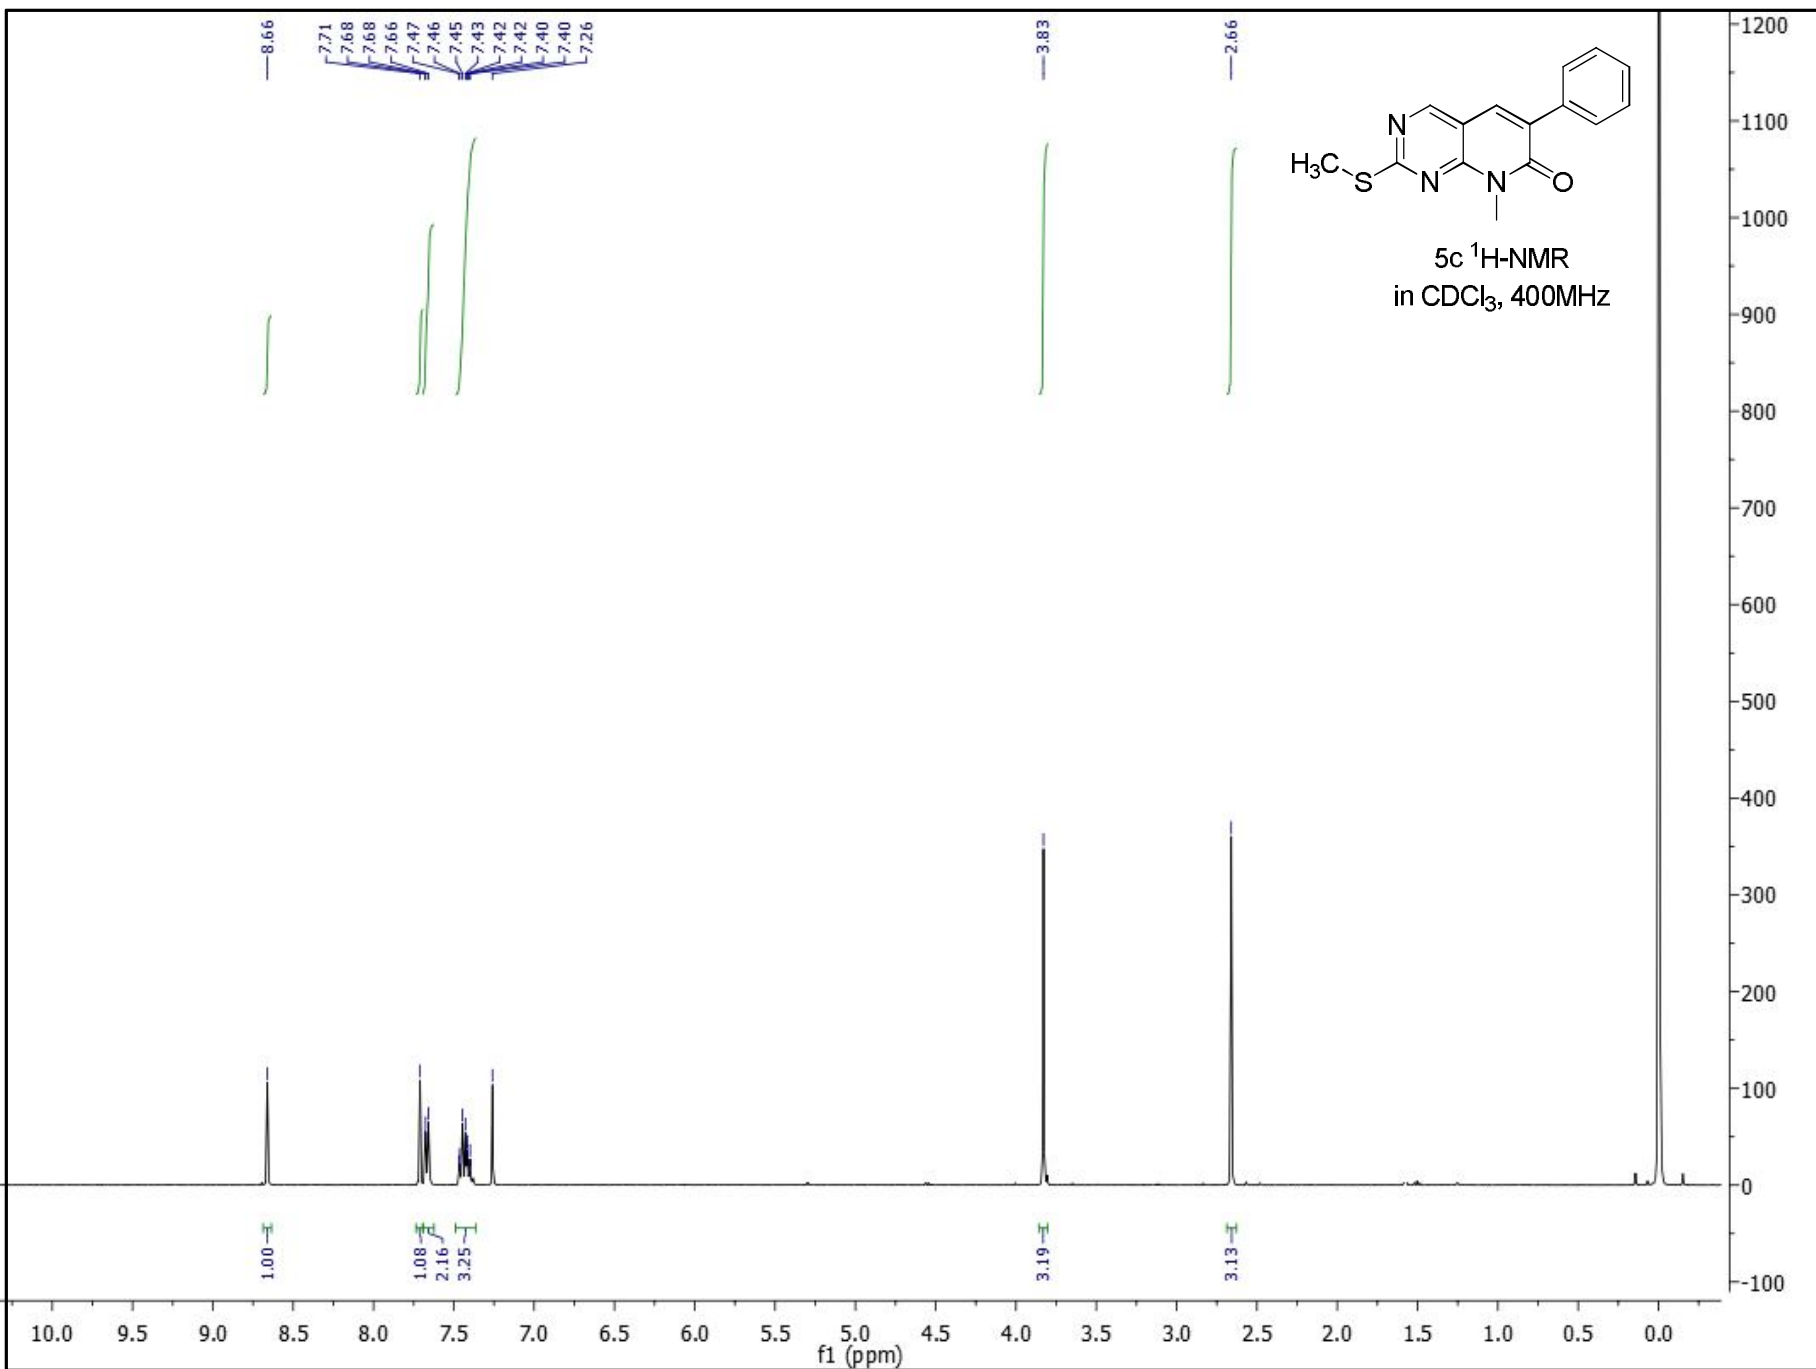

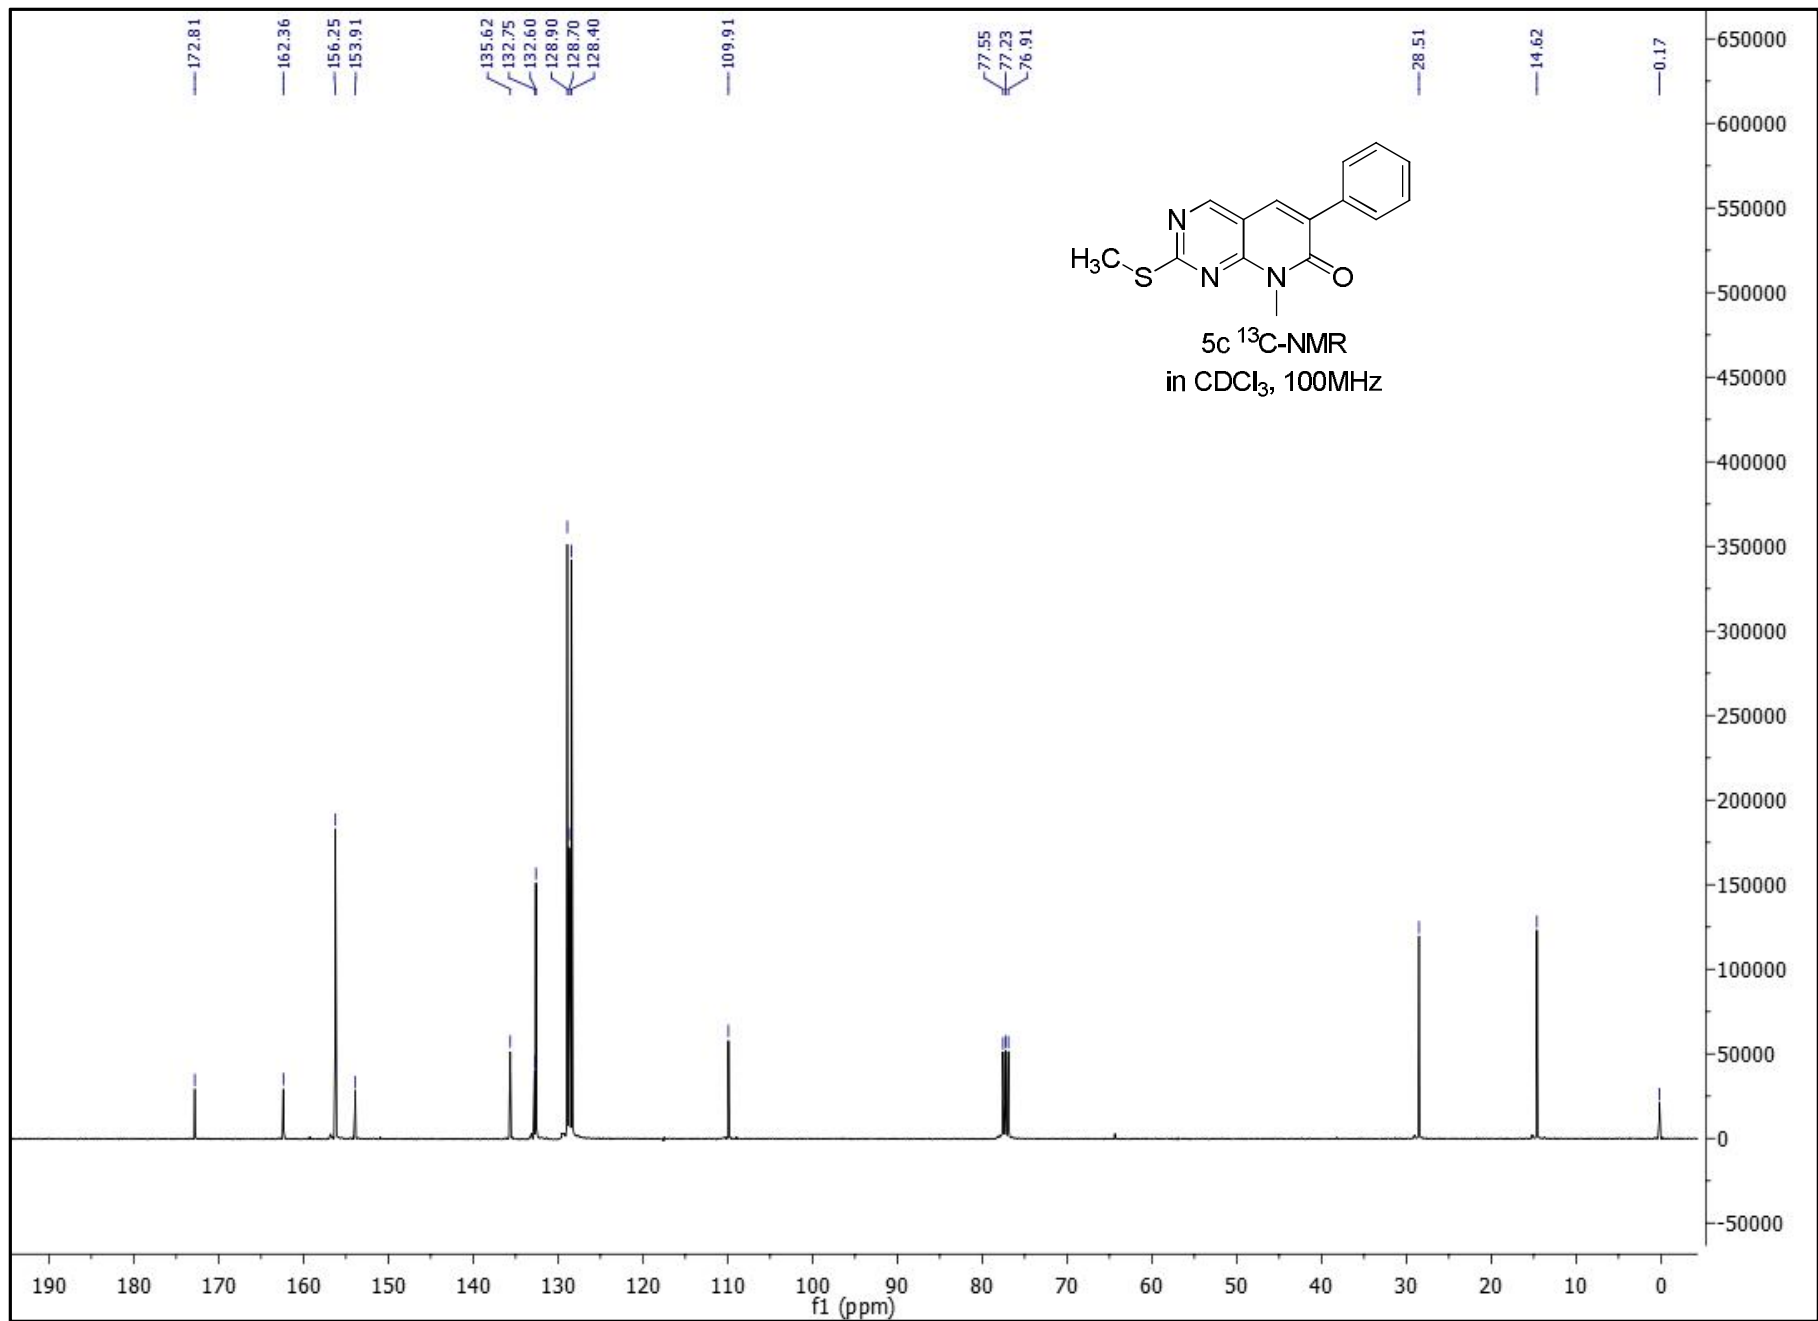

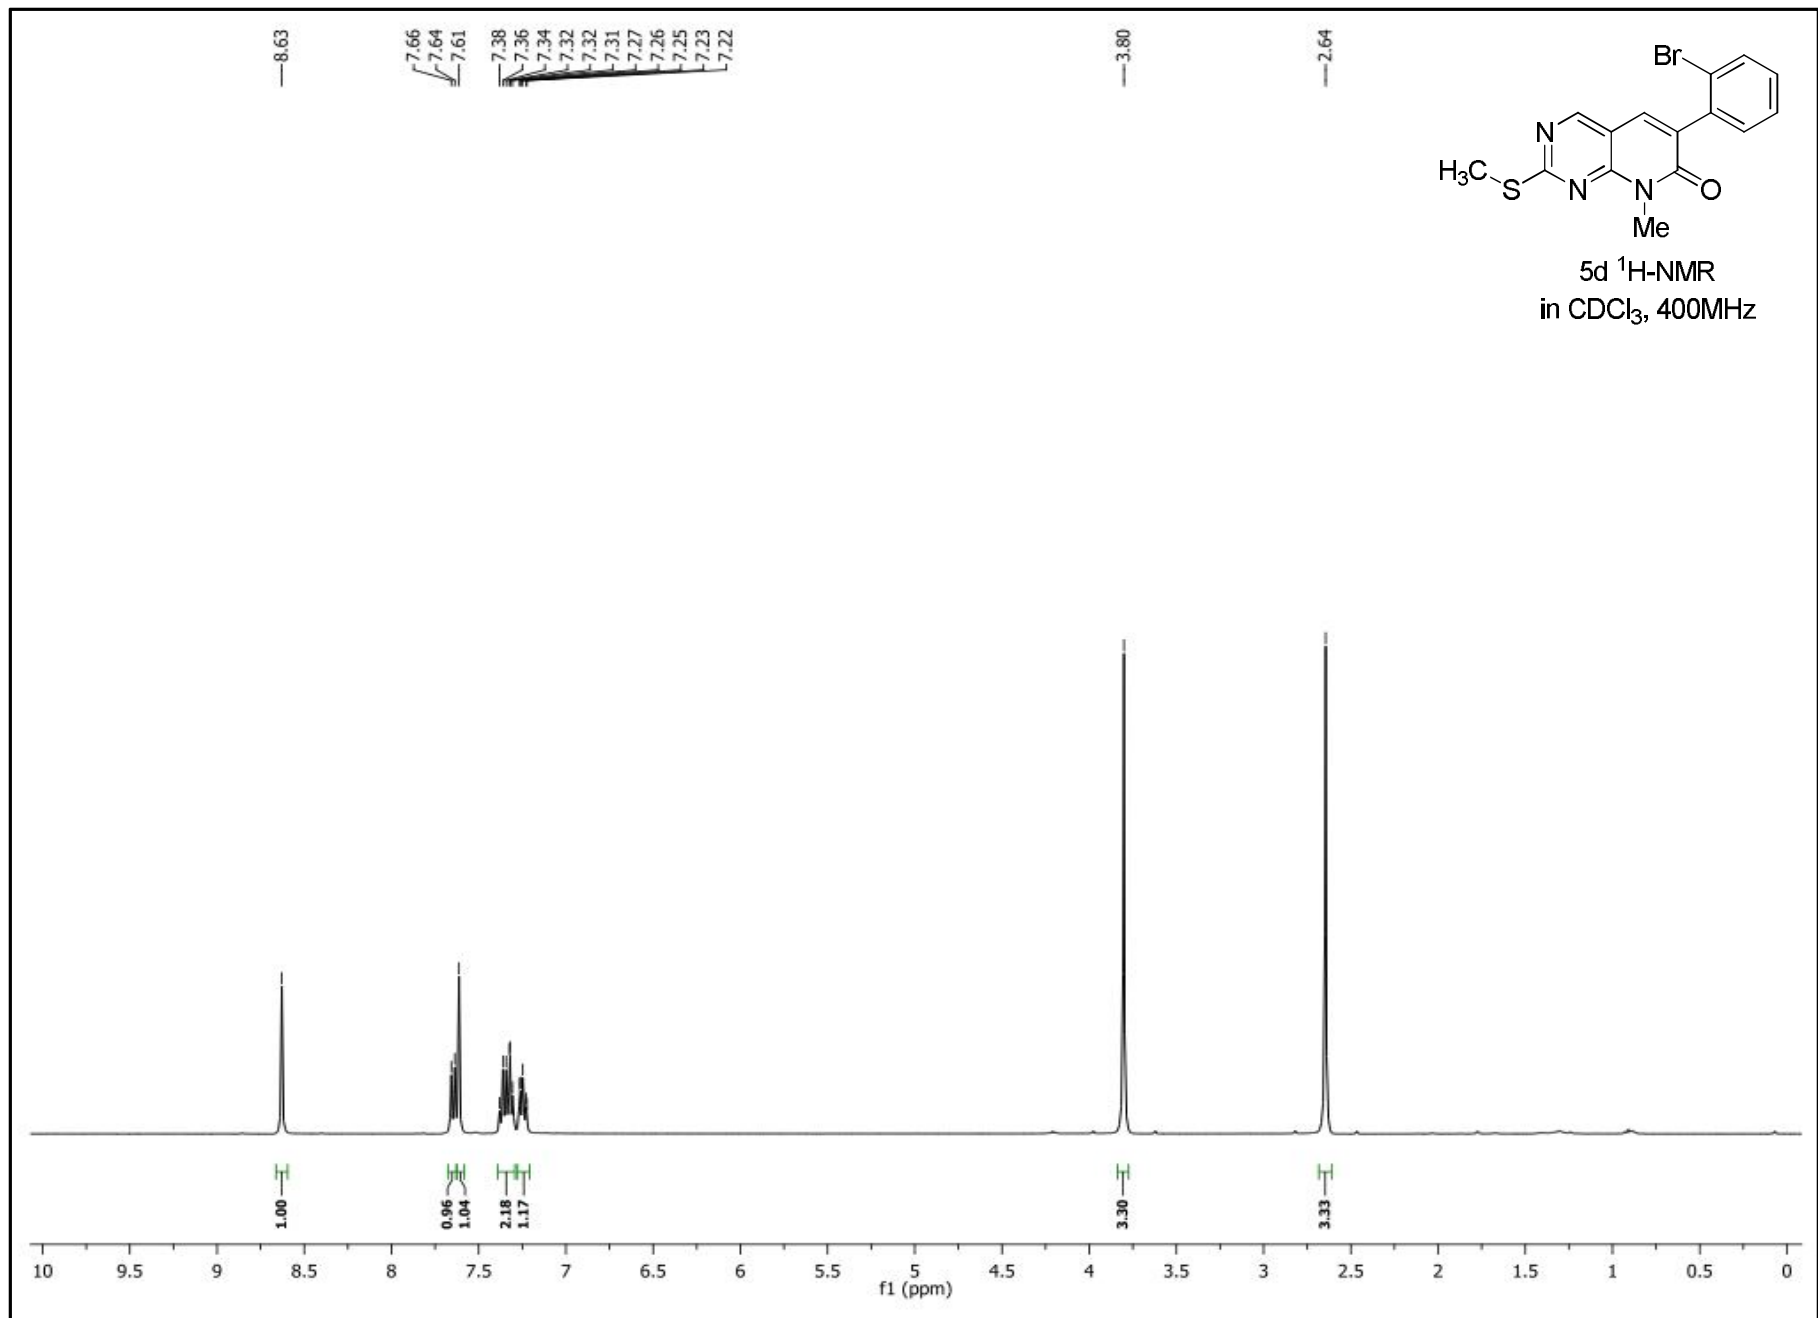



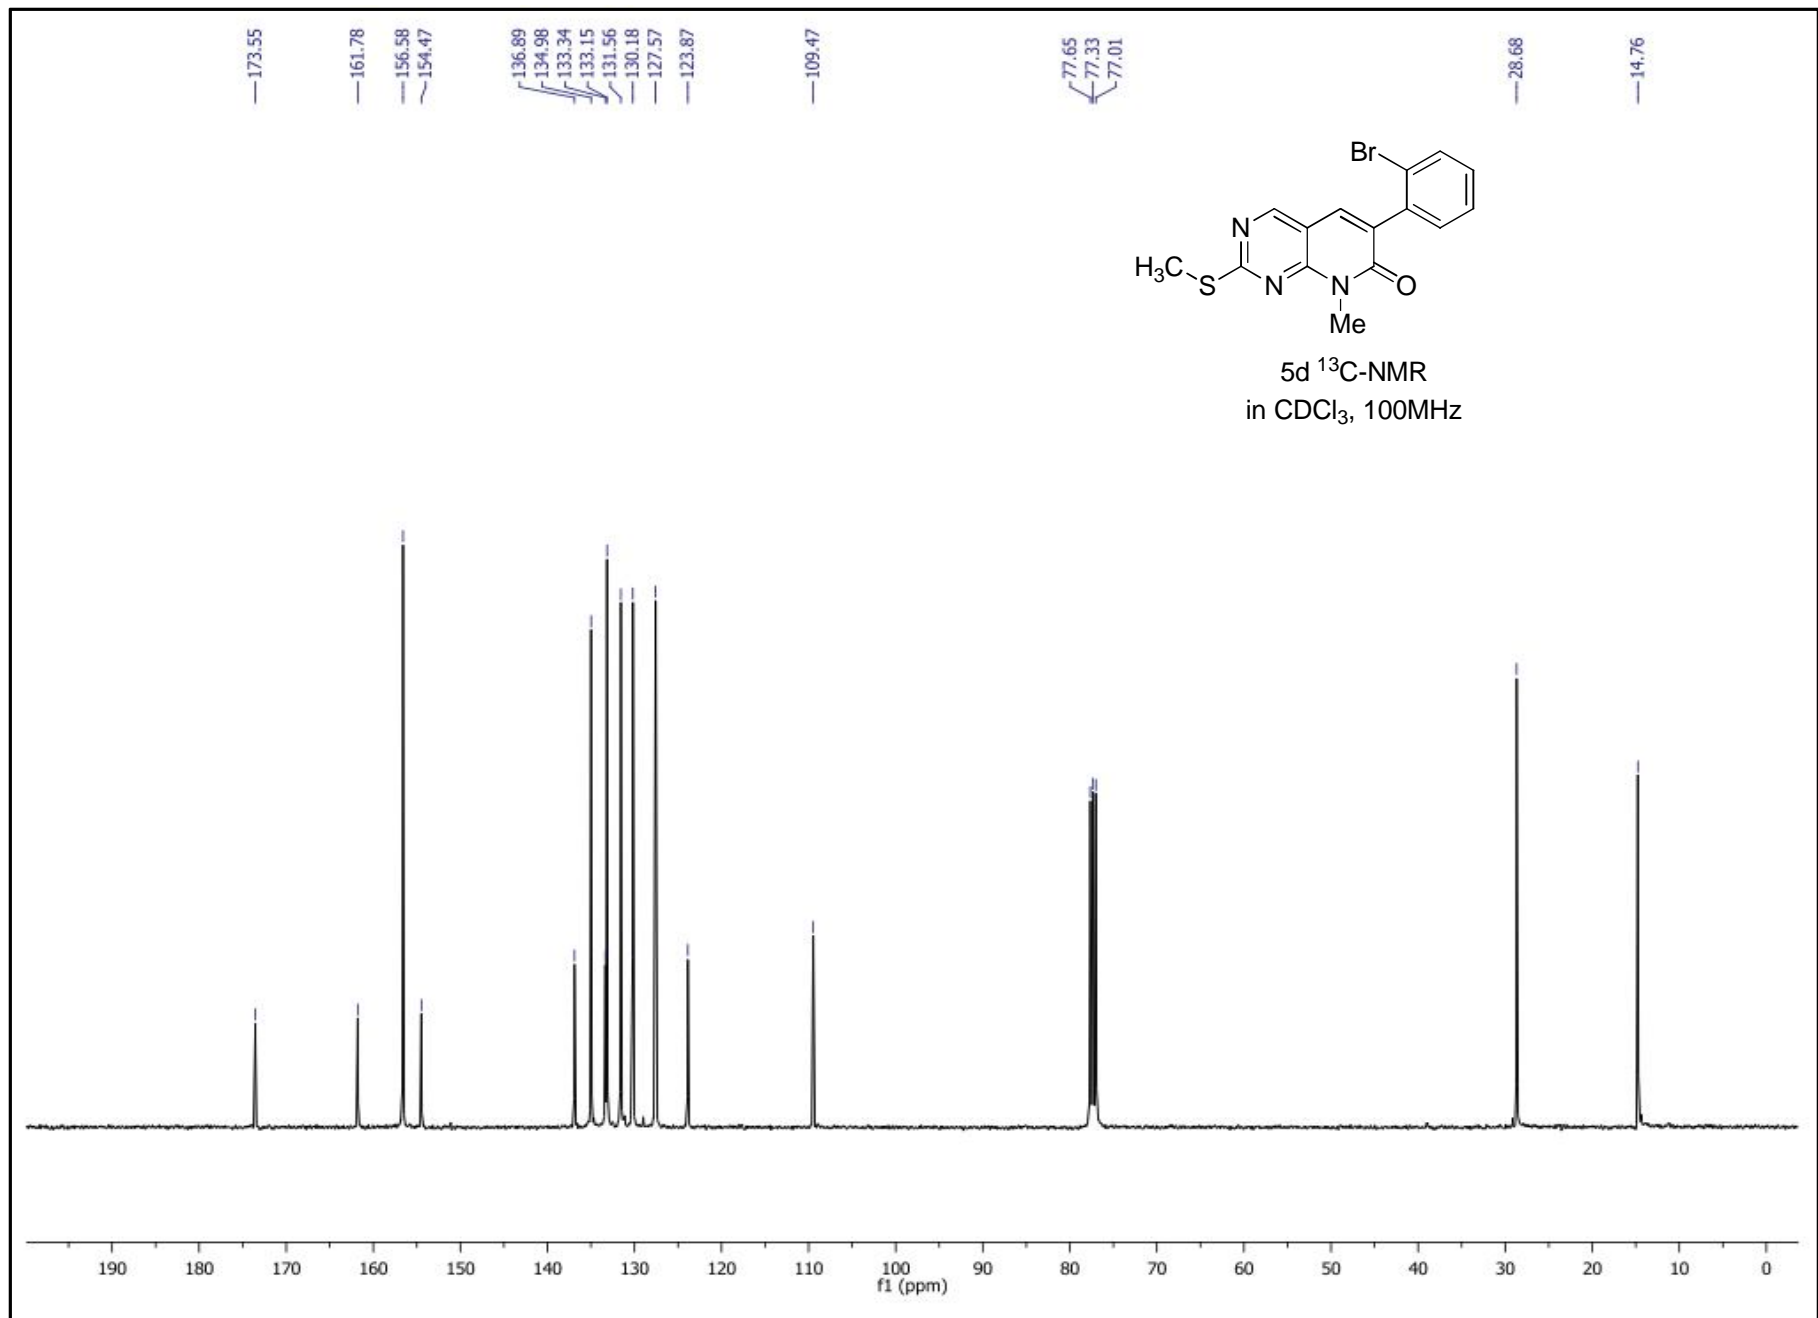

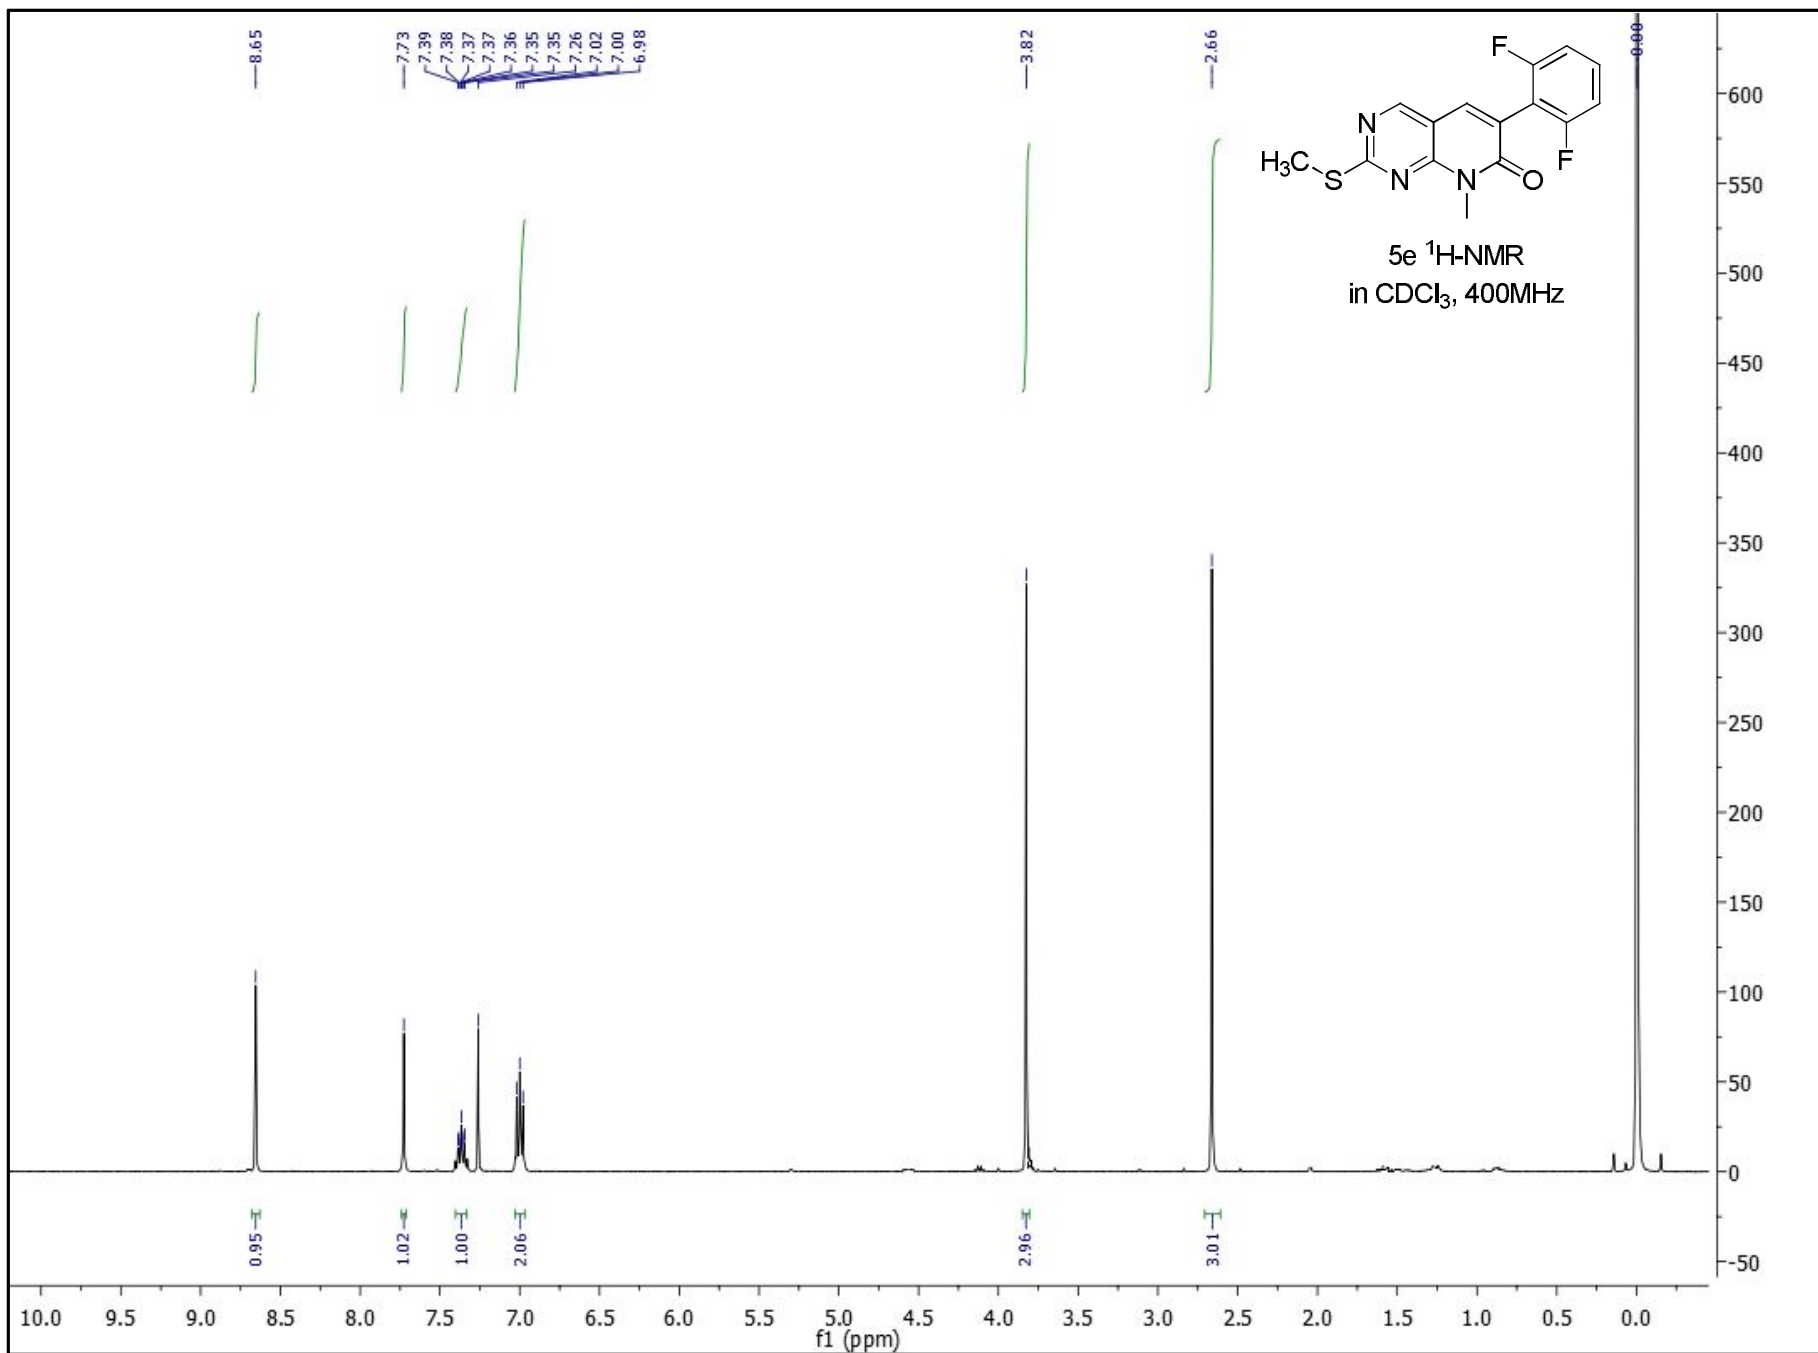

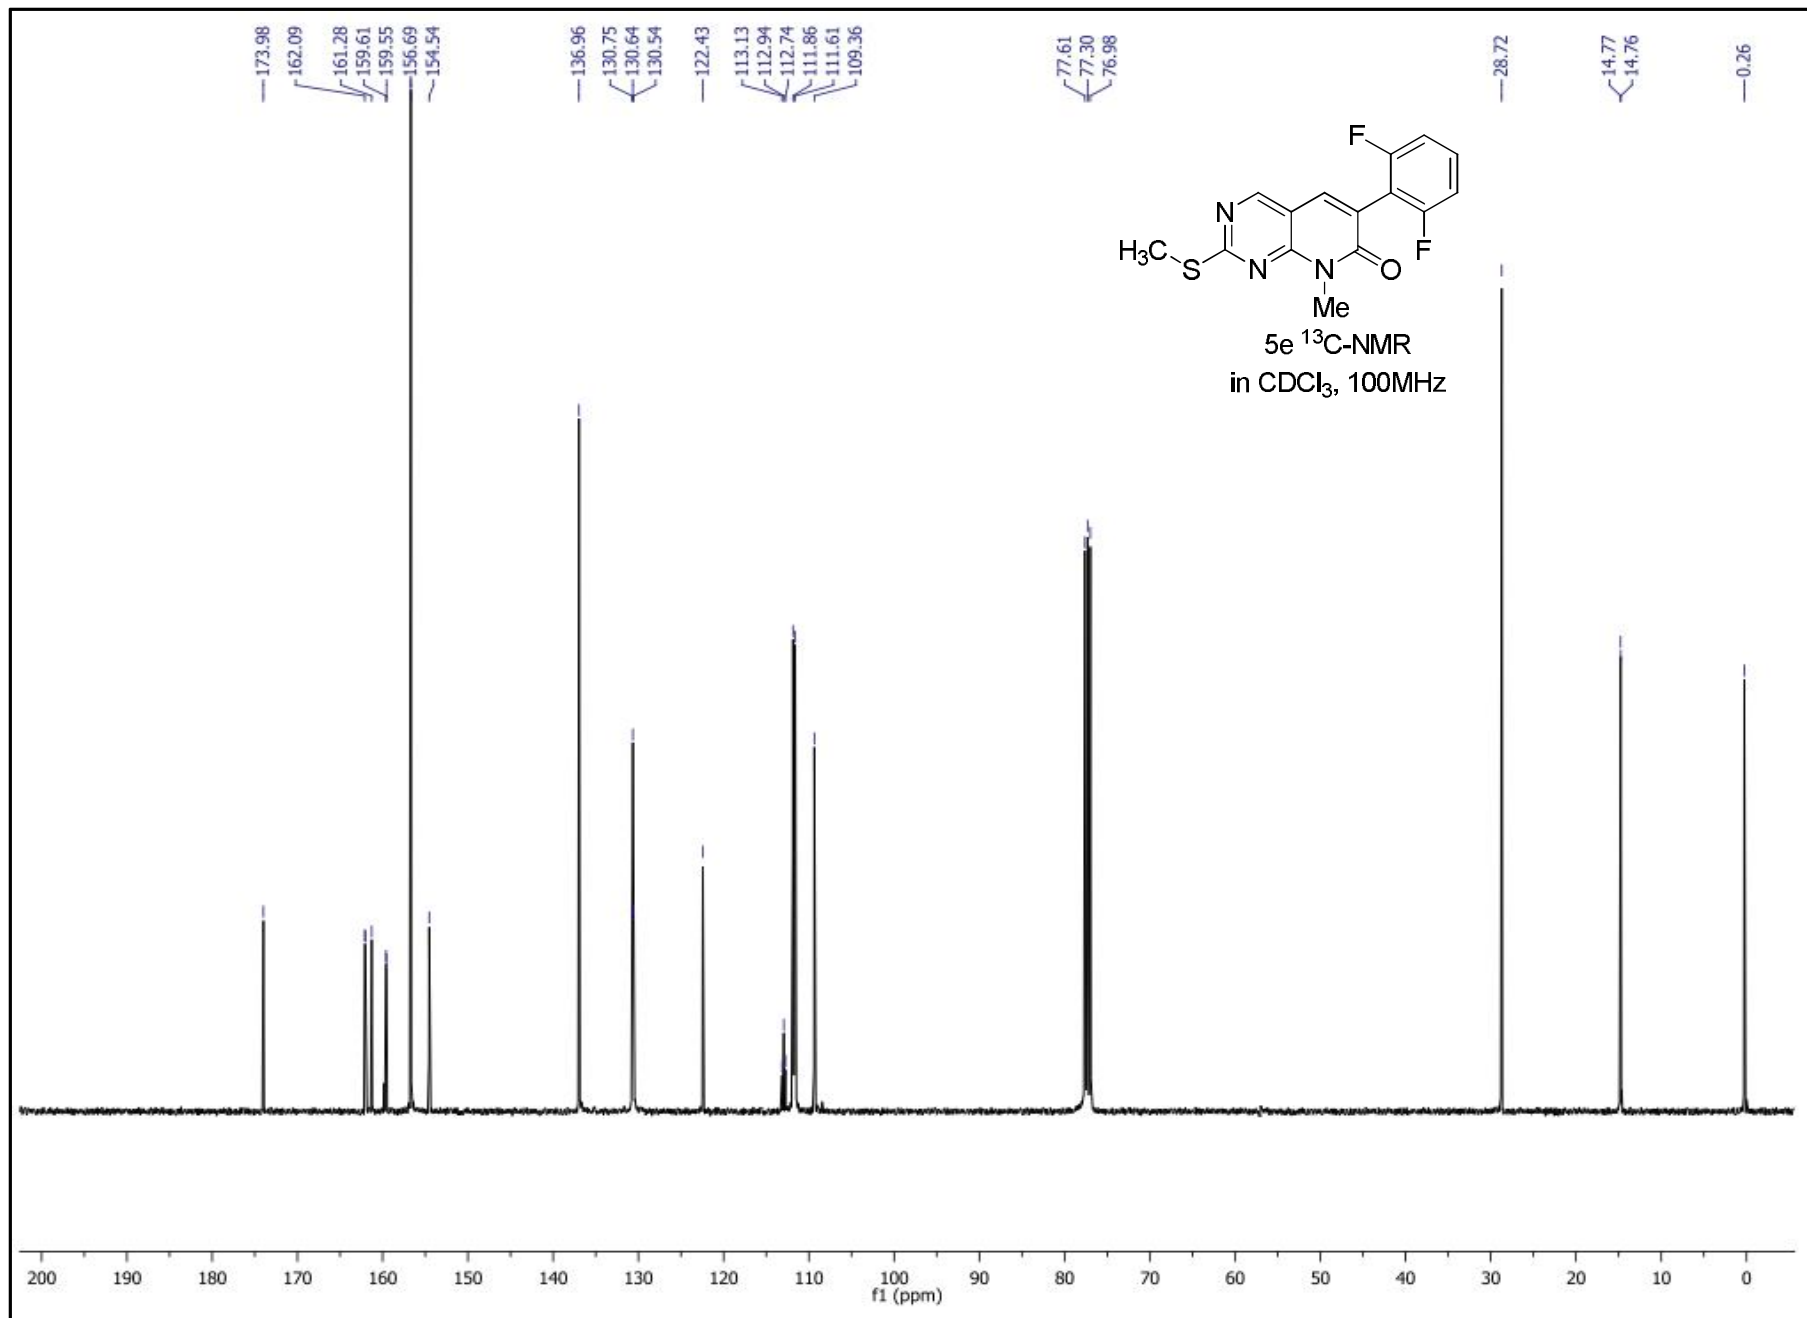

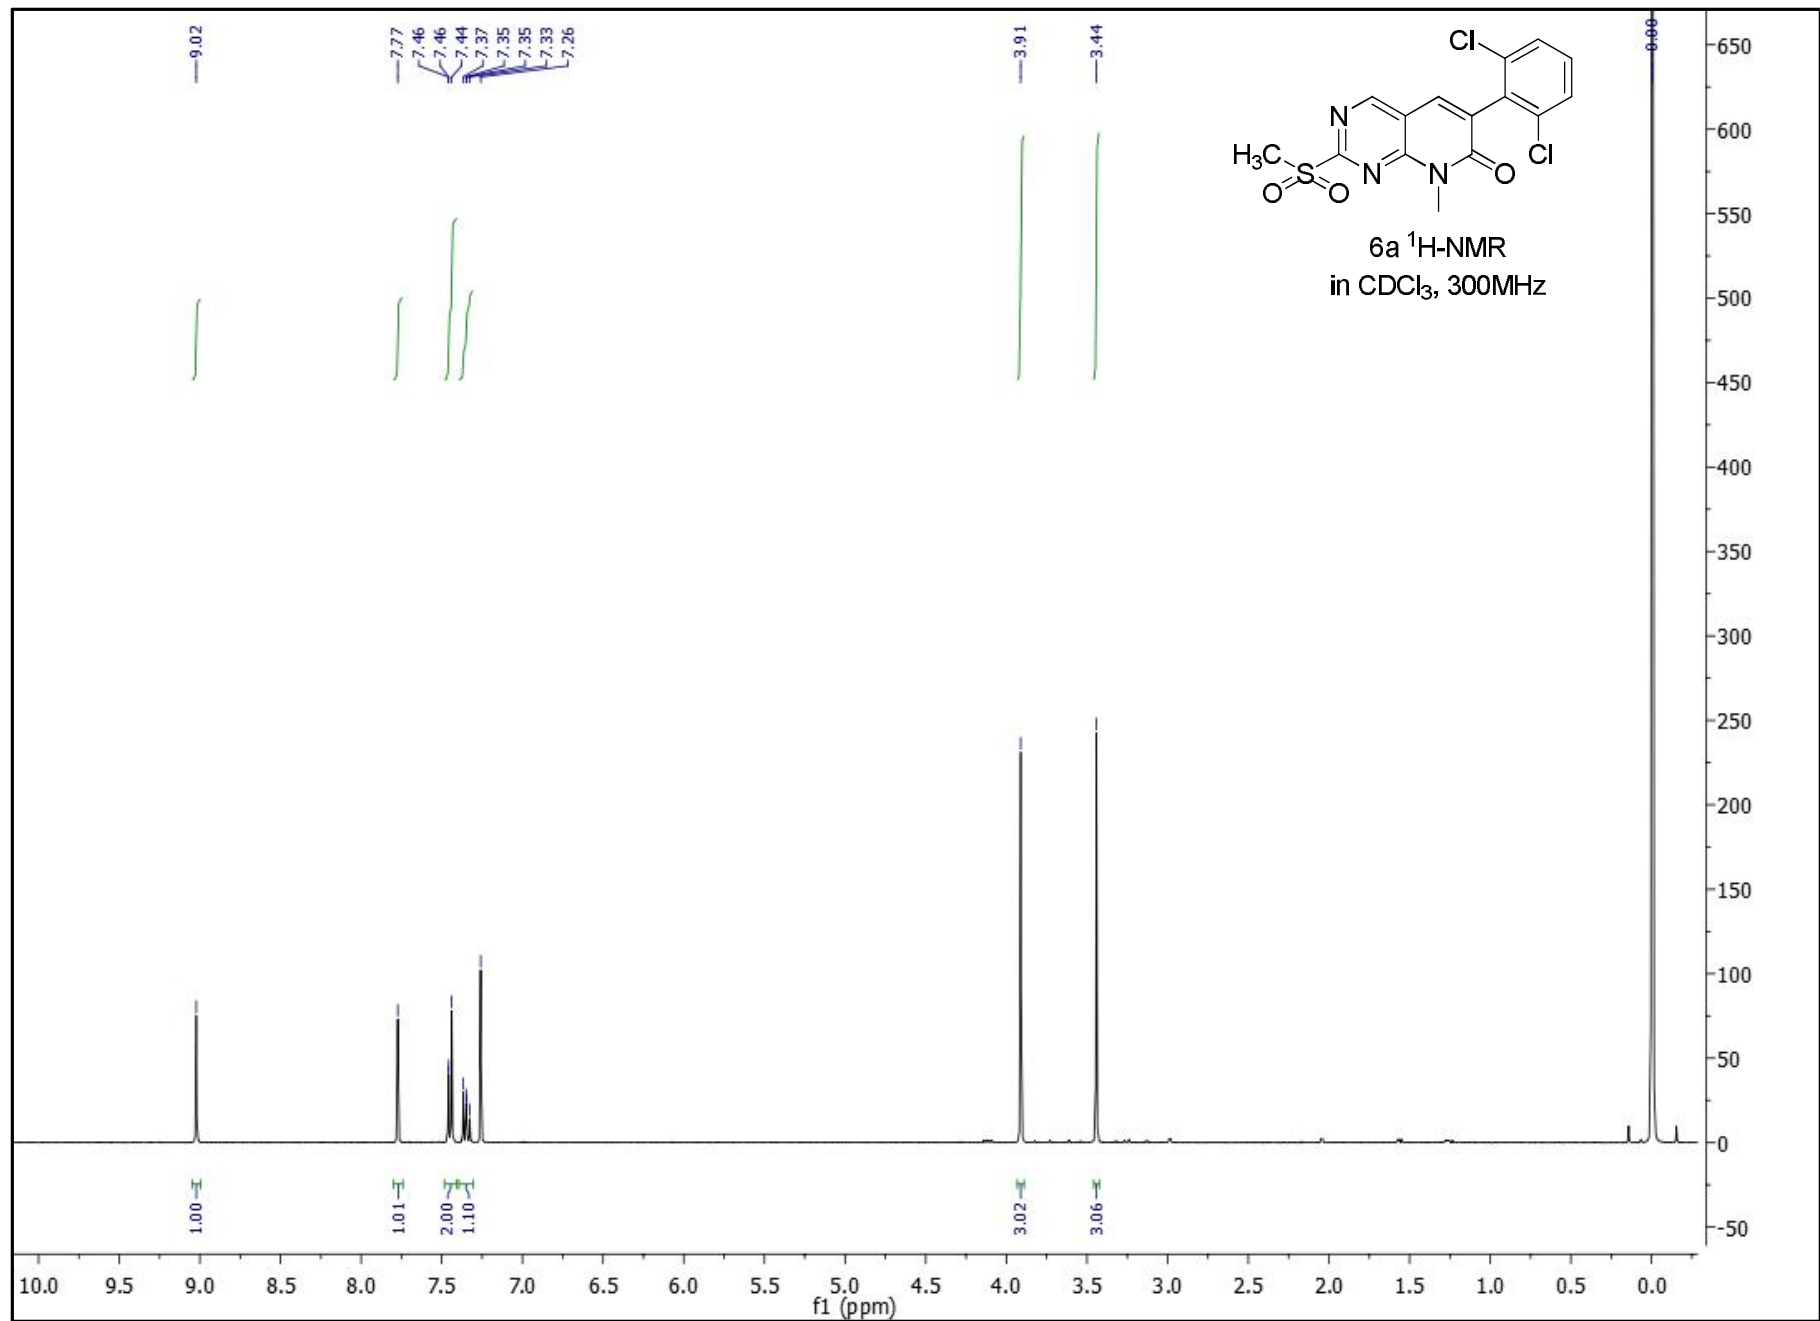

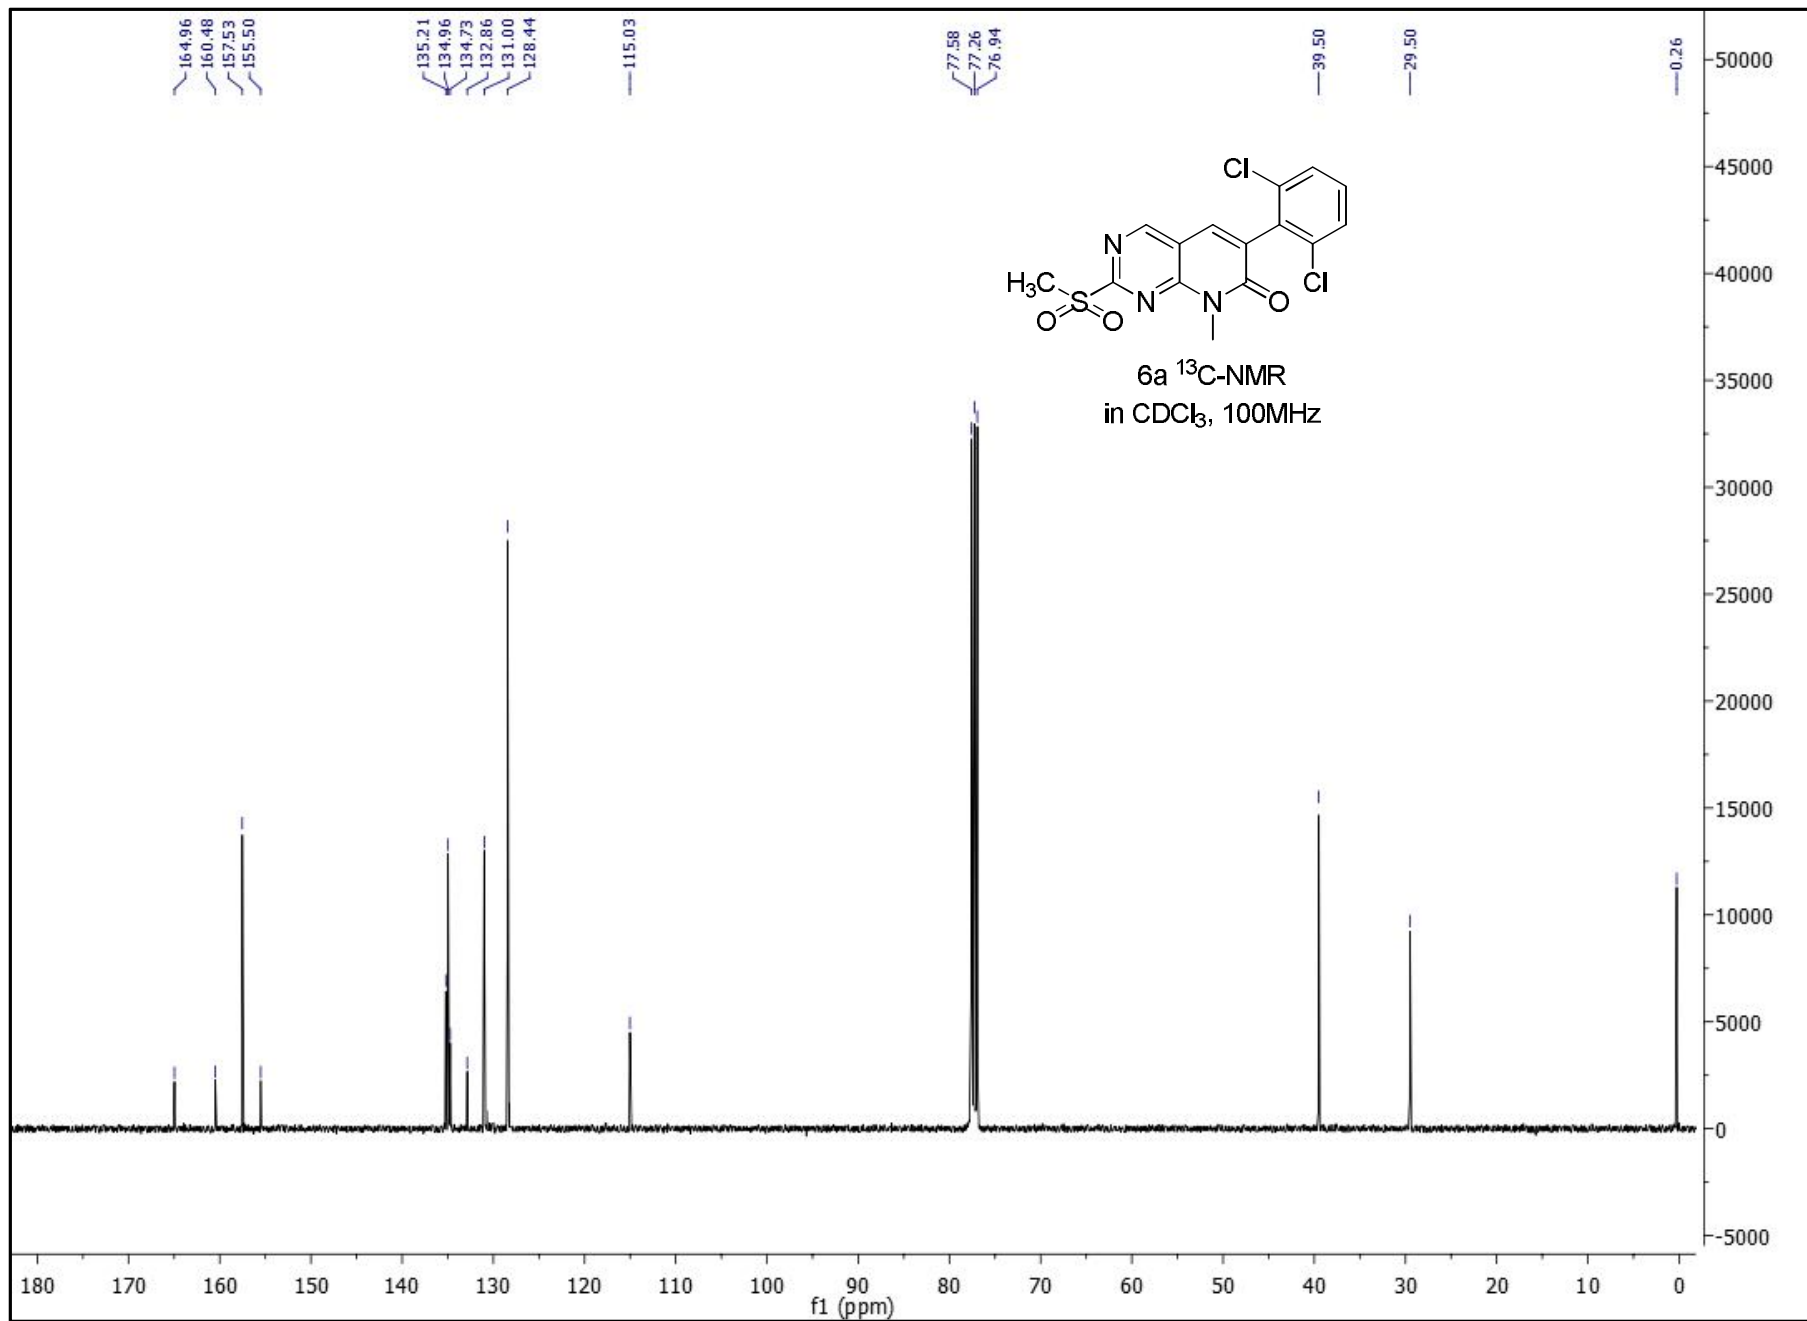

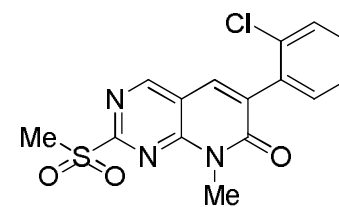

6b <sup>1</sup>H-NMR  
in CDCl<sub>3</sub>, 400MHz

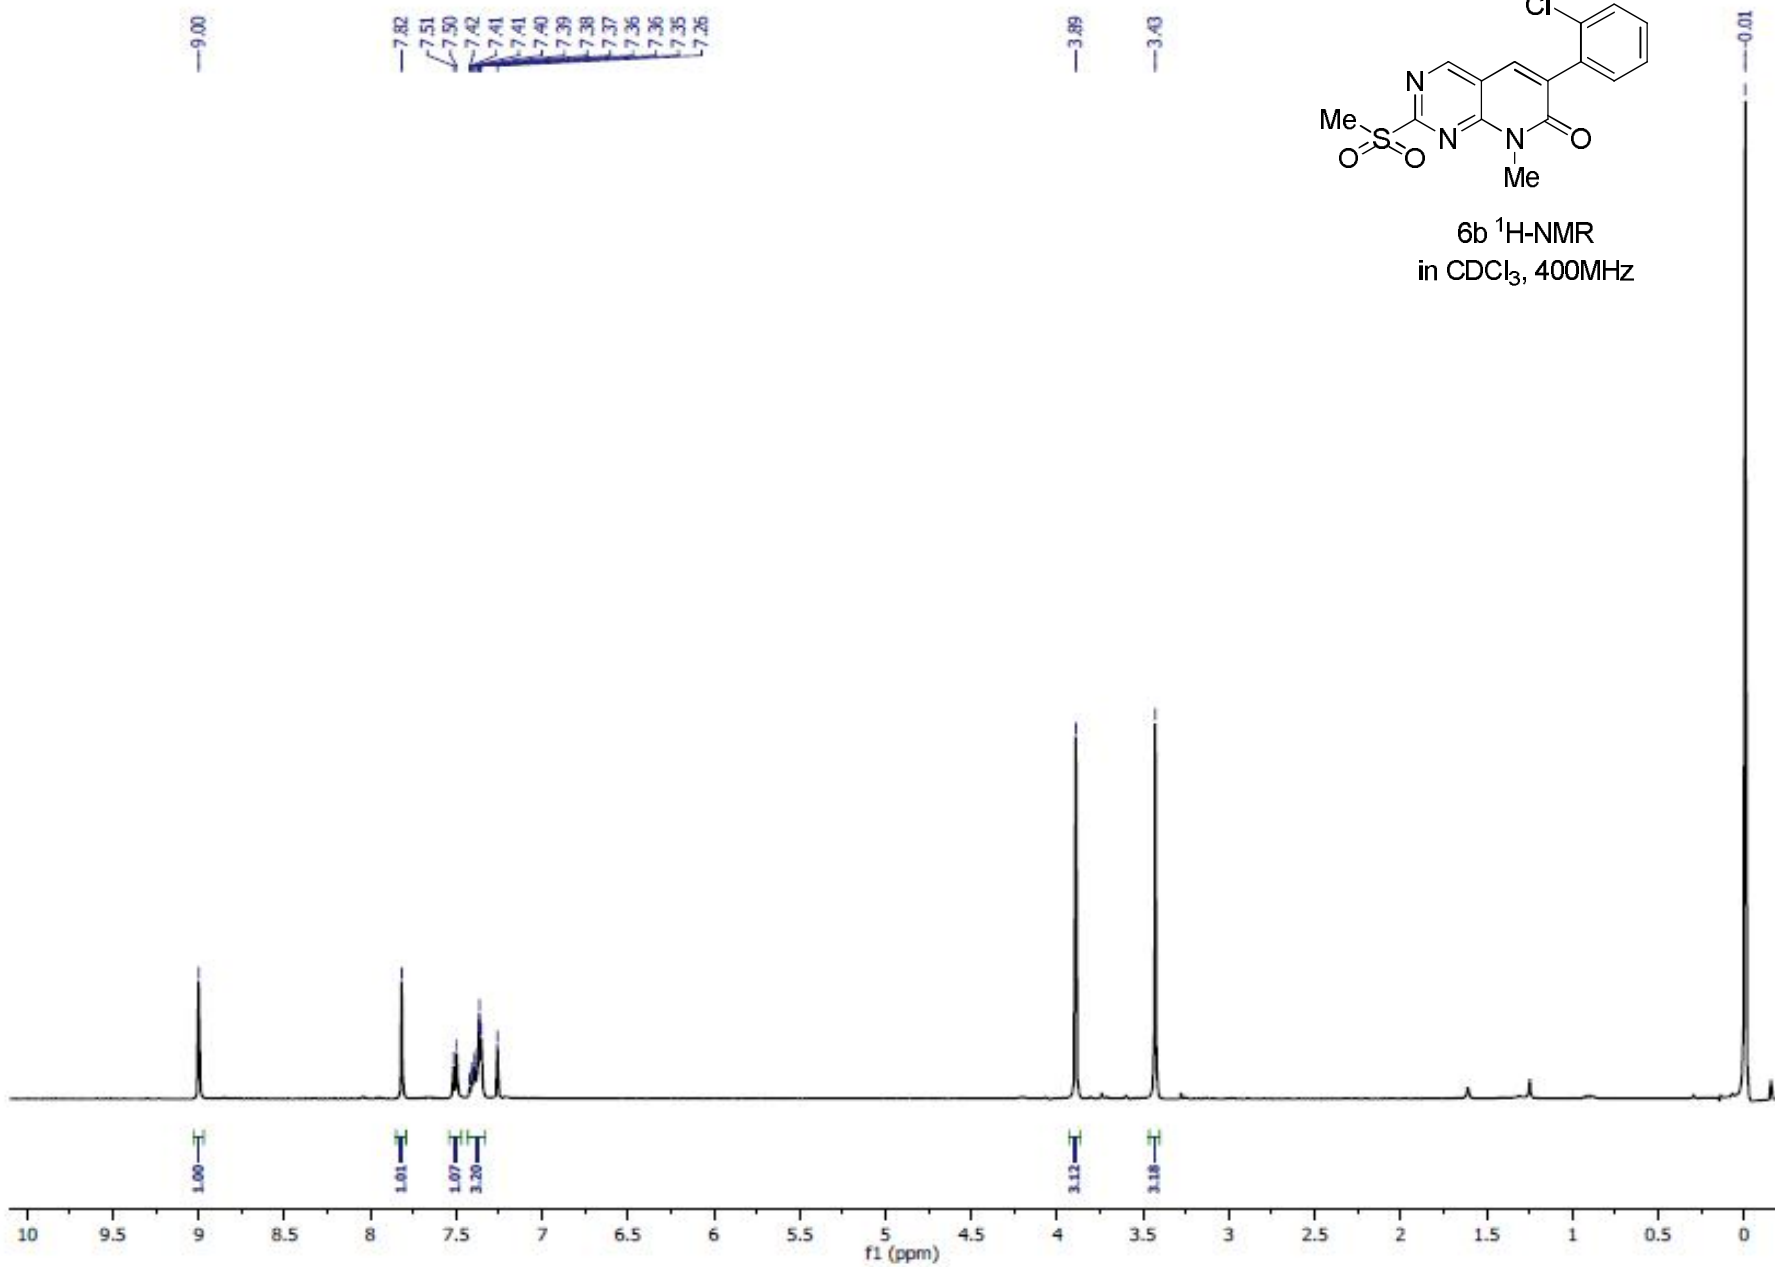

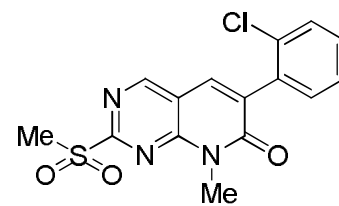

6b  $^{13}\text{C}$ -NMR  
in  $\text{CDCl}_3$ , 100MHz

164.65  
161.23  
157.27  
155.23

136.65  
133.53  
130.14  
127.11

115.14

77.55  
77.23  
76.91

39.45

29.44

0.22

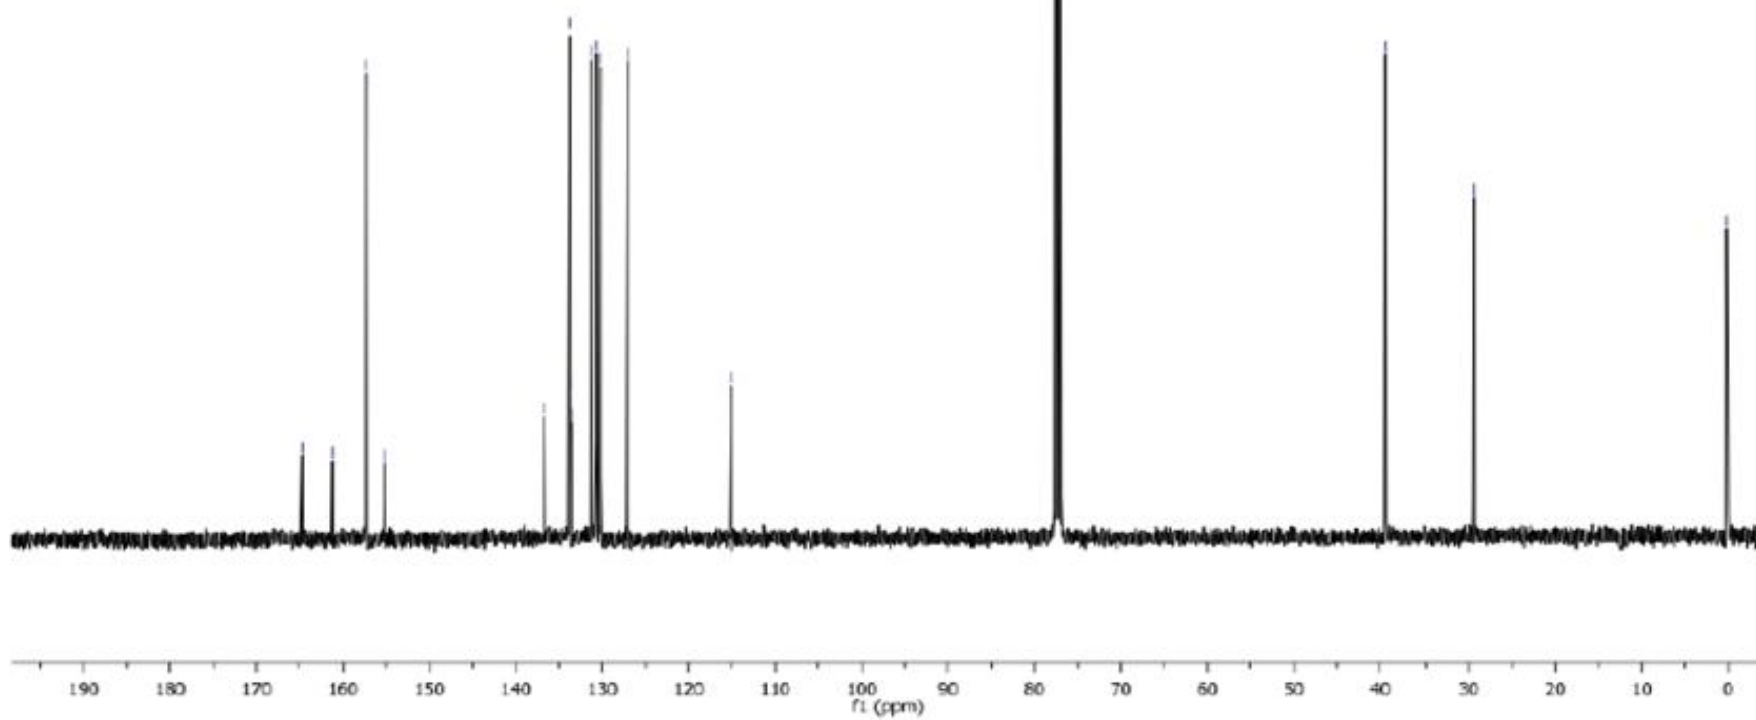

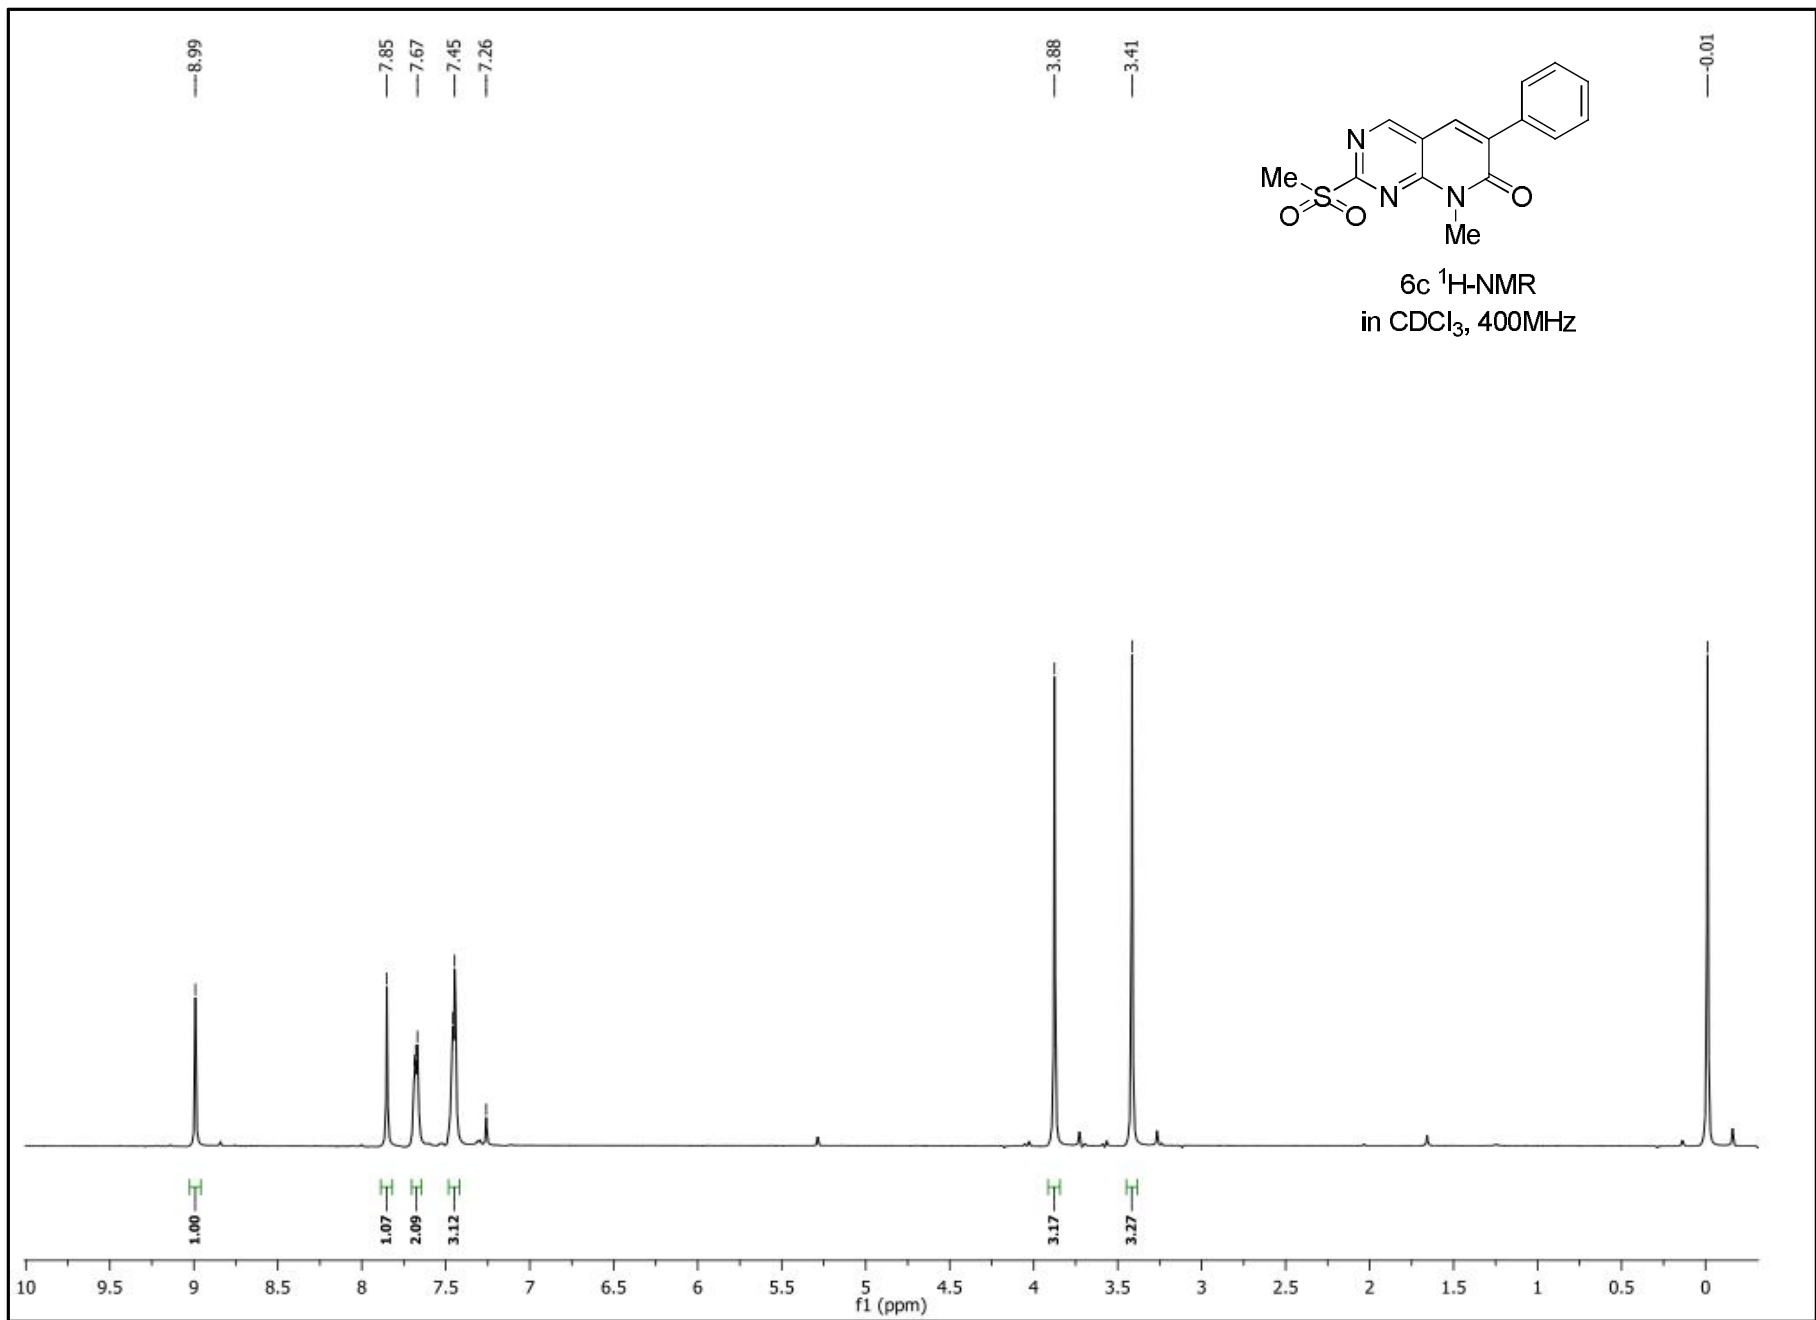



164.16  
161.96  
157.02  
154.74

137.70  
134.68  
131.25  
129.84  
129.11  
128.74

115.71

77.62  
77.30  
76.98

39.49

29.45

0.27

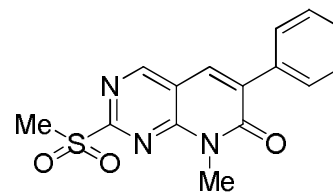

6c <sup>13</sup>C-NMR  
in CDCl<sub>3</sub>, 100MHz

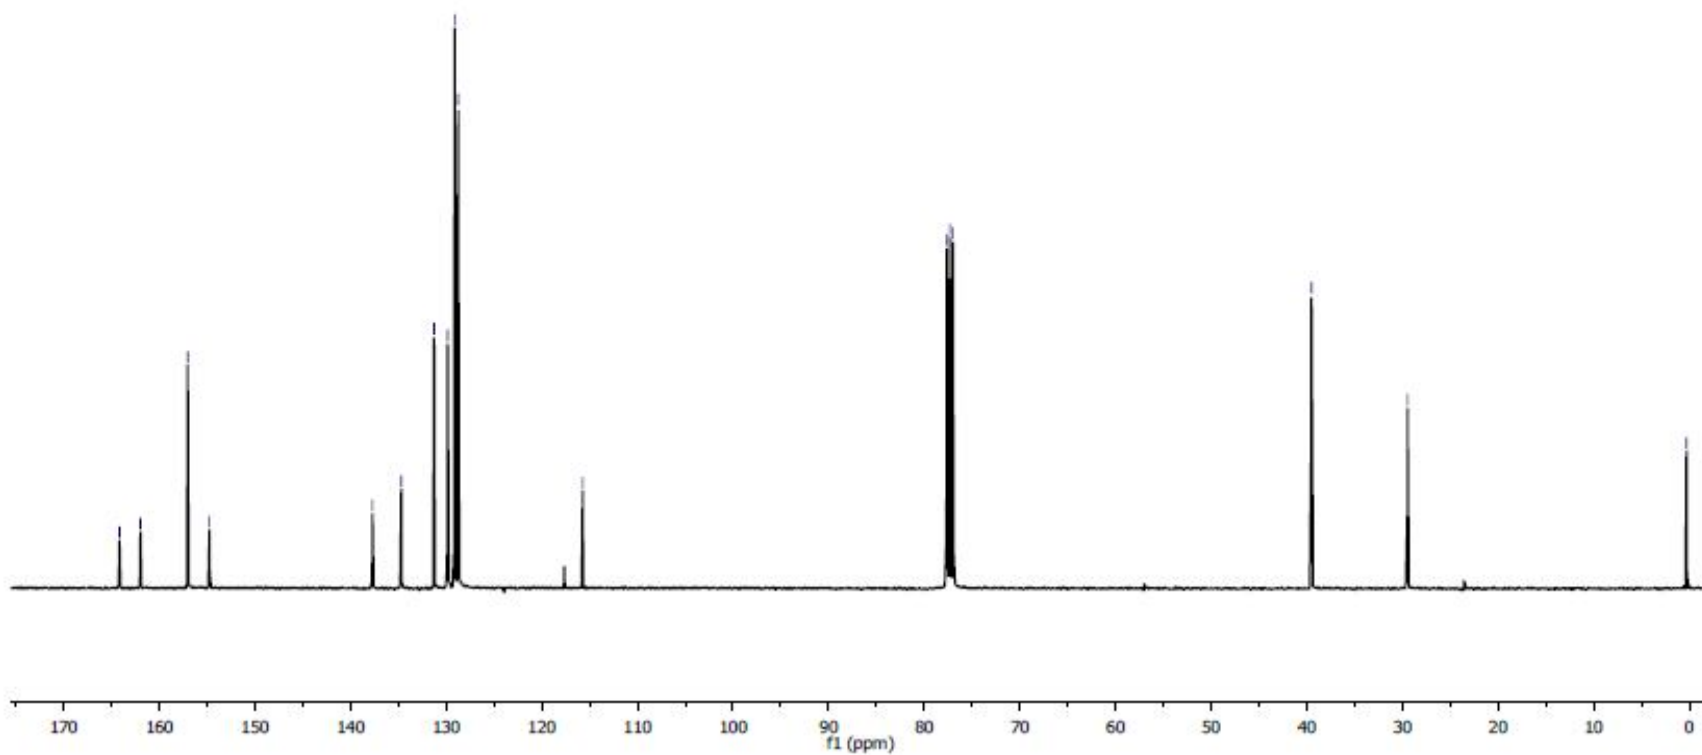

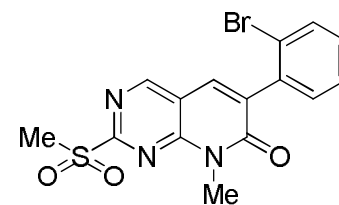

6d  $^1\text{H-NMR}$   
in  $\text{CDCl}_3$ , 400MHz

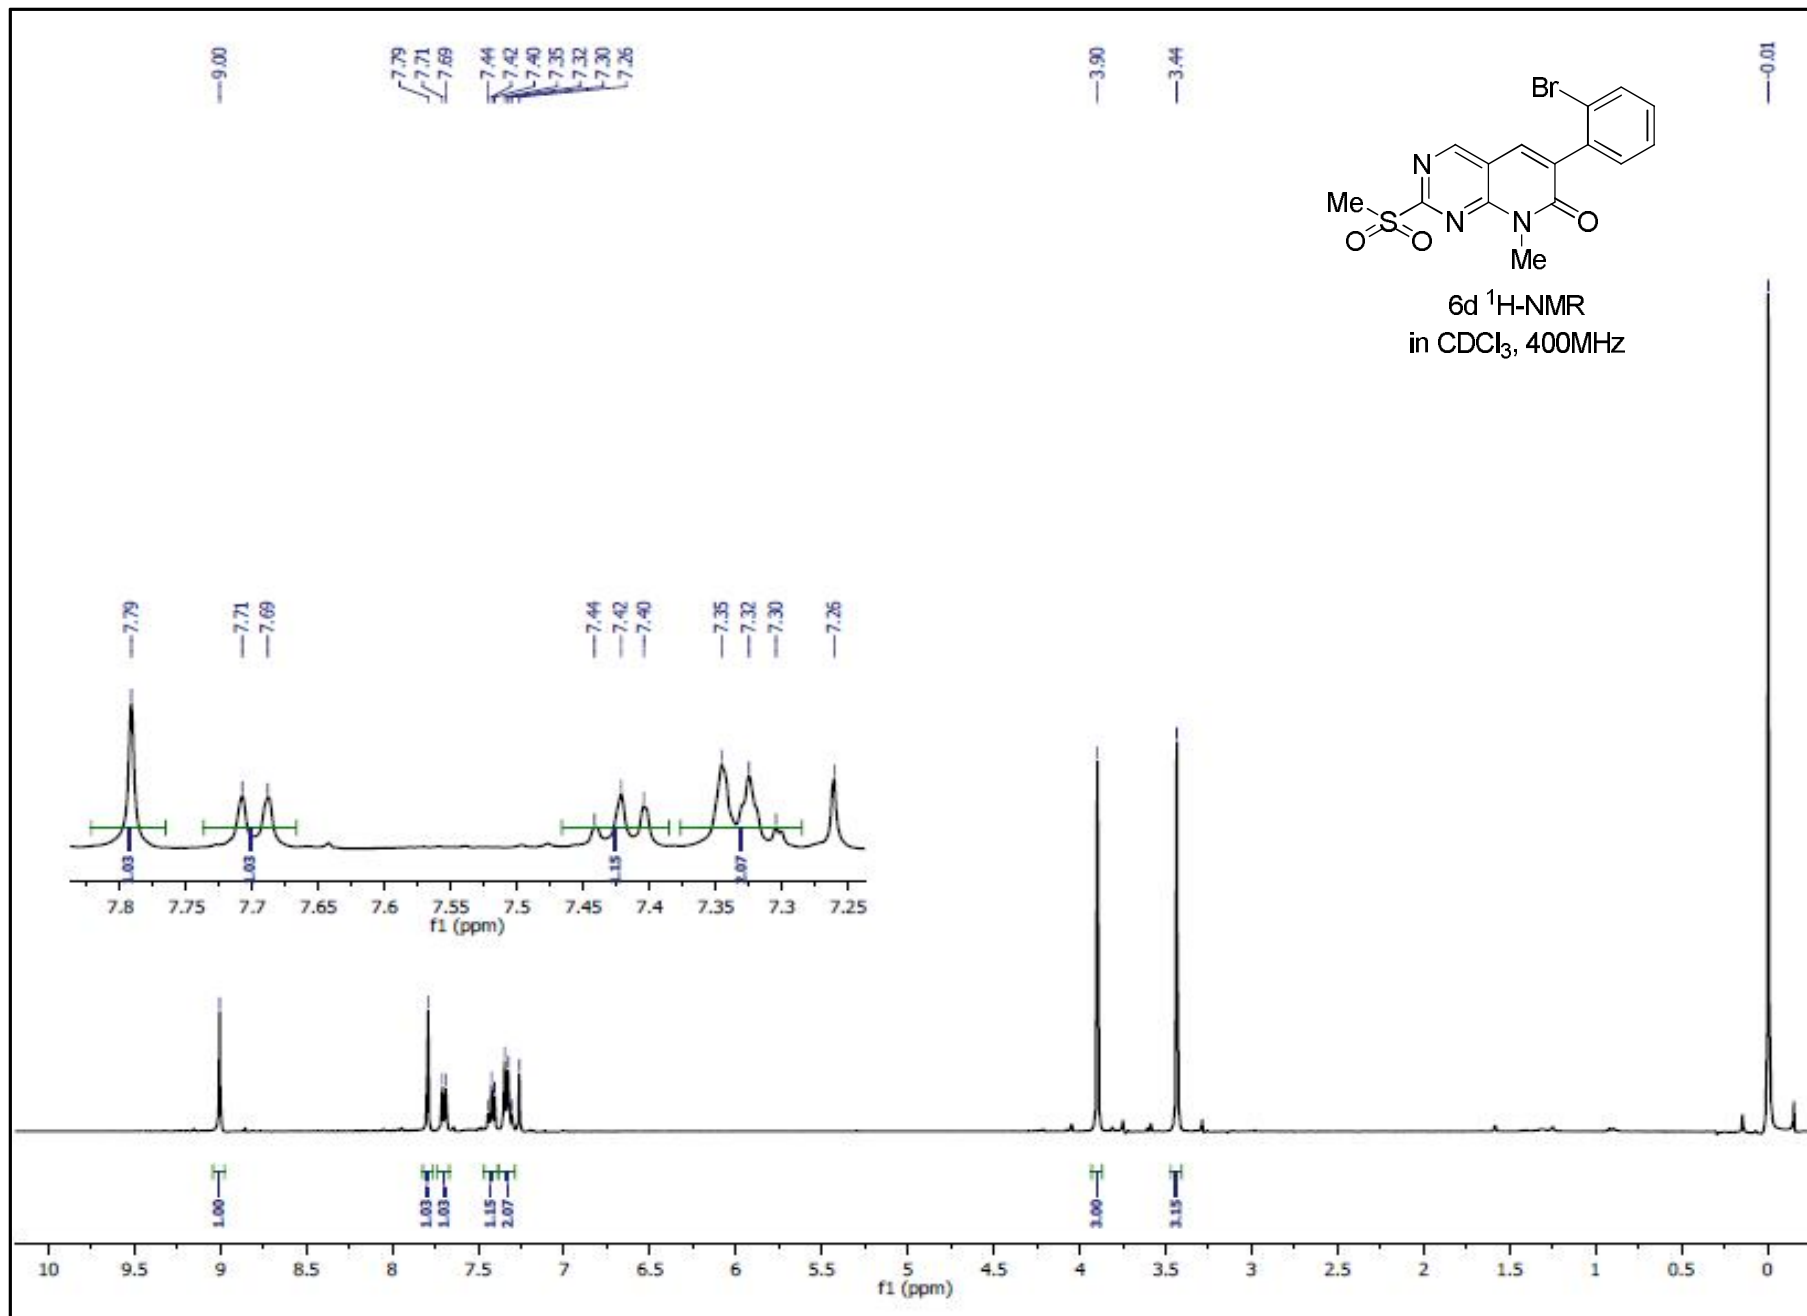

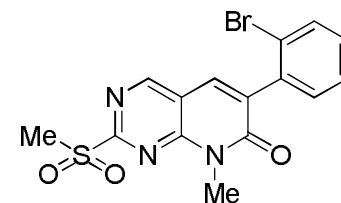

6d <sup>13</sup>C-NMR  
in CDCl<sub>3</sub>, 100MHz

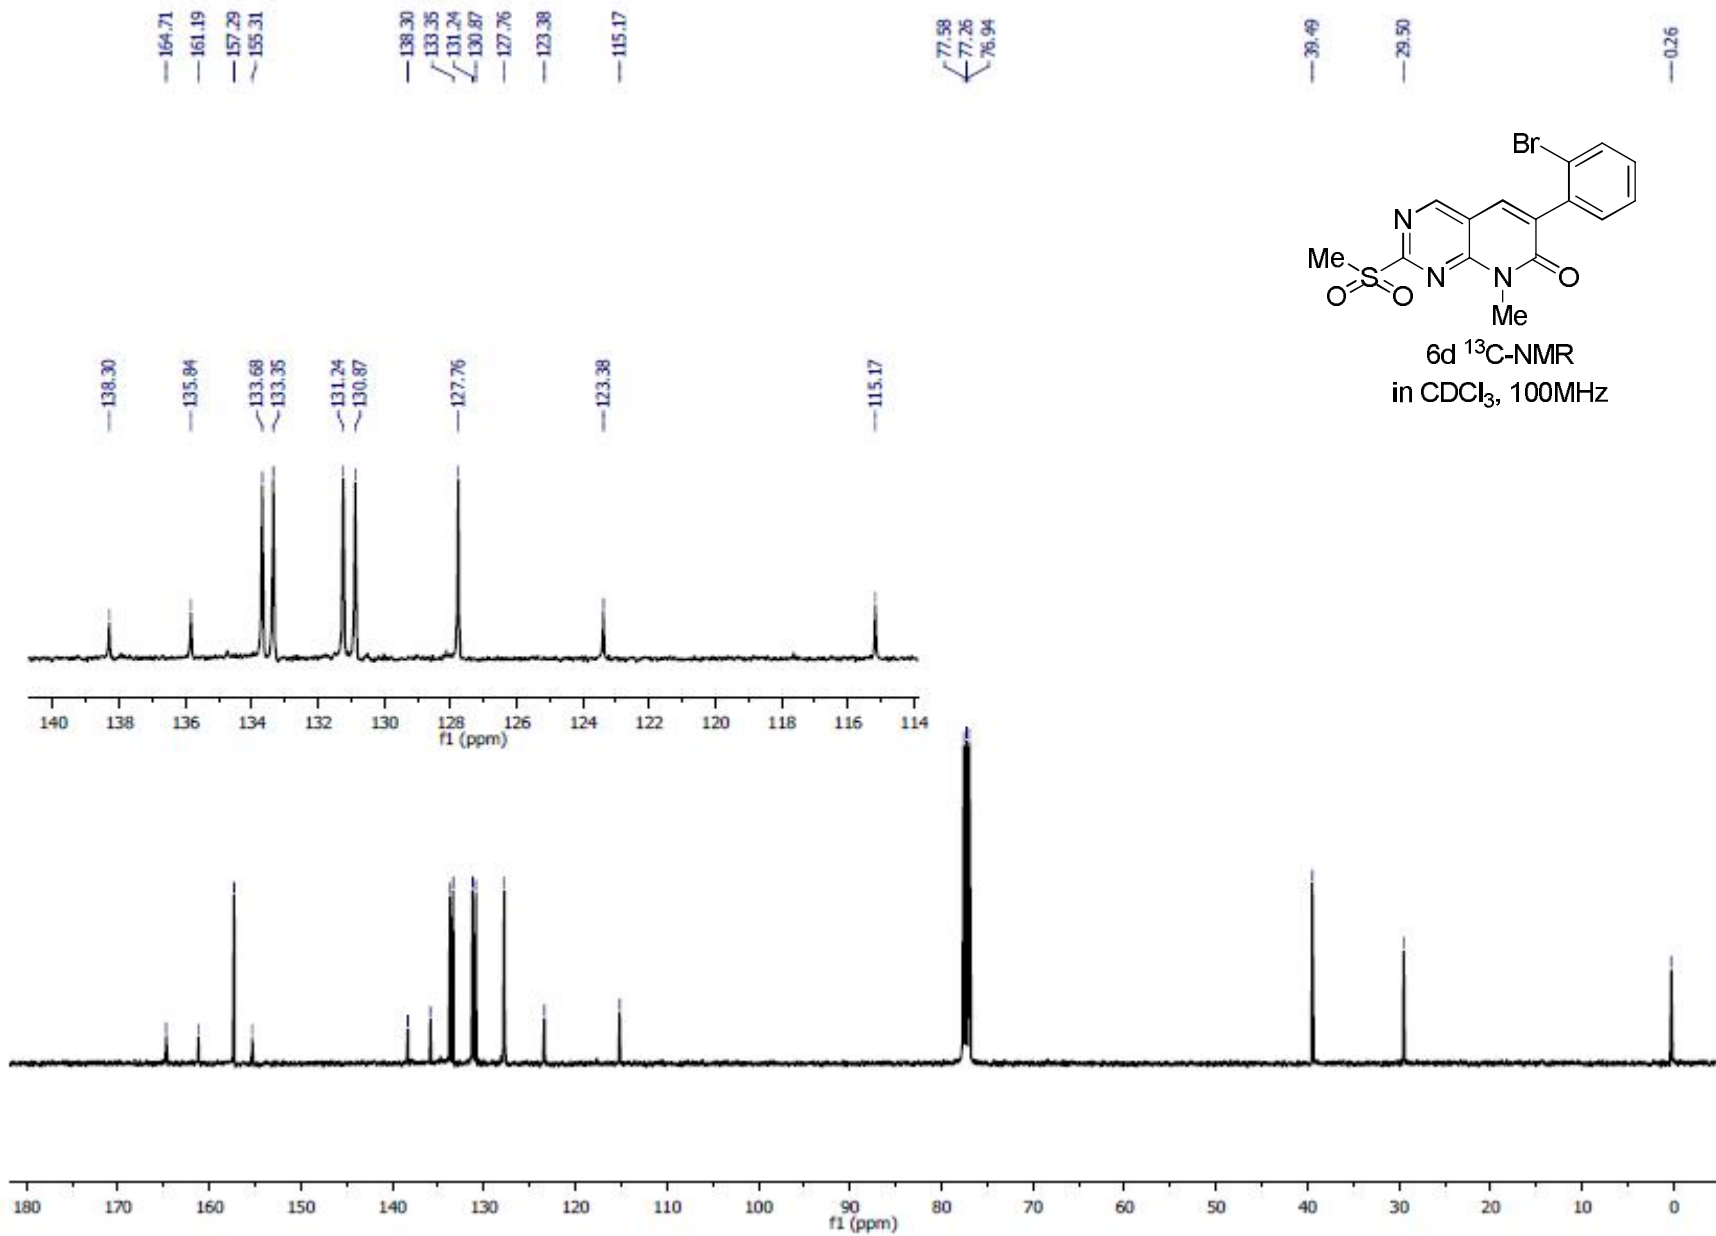

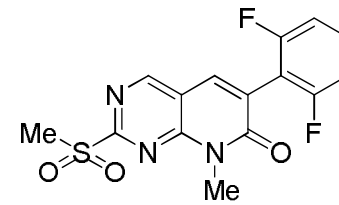

6e <sup>1</sup>H-NMR  
in CDCl<sub>3</sub>, 400MHz

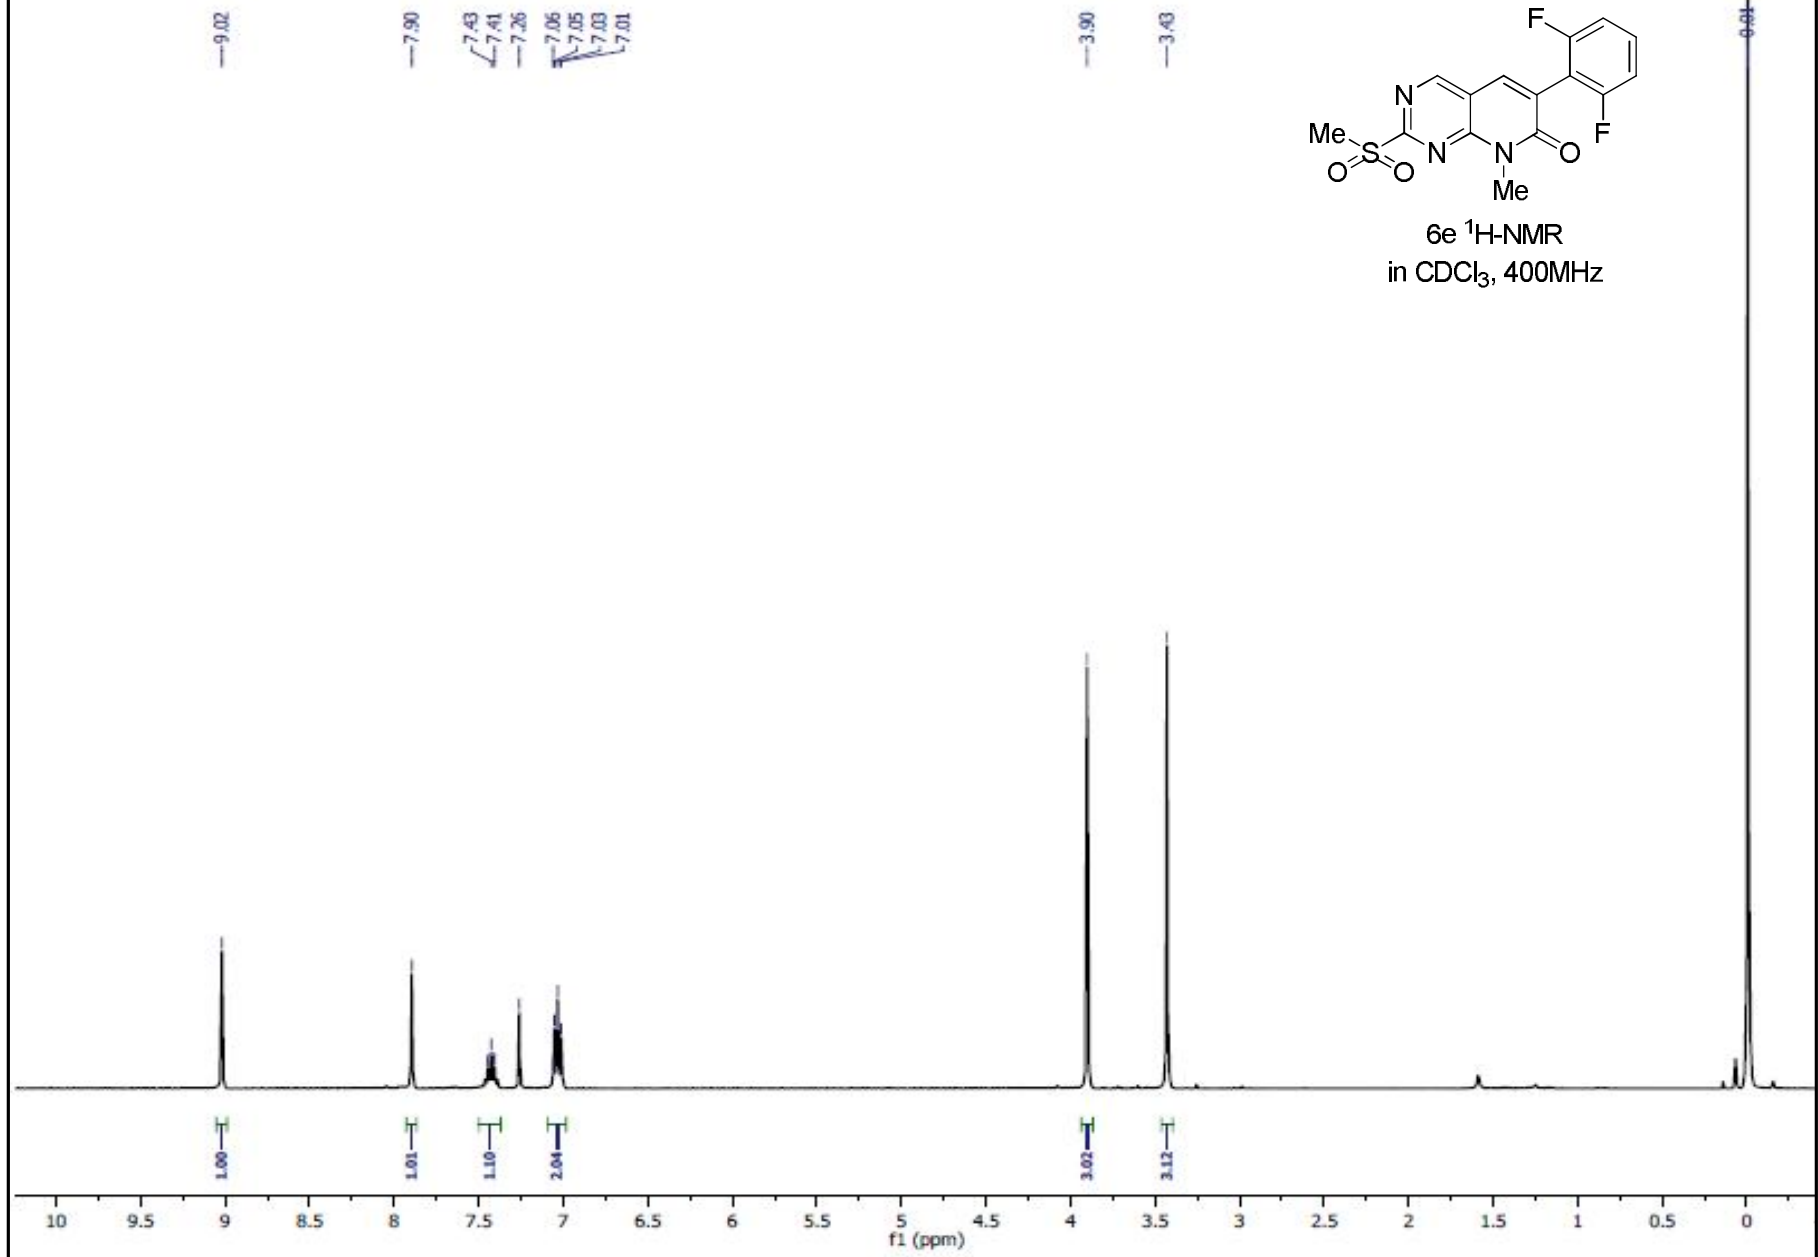

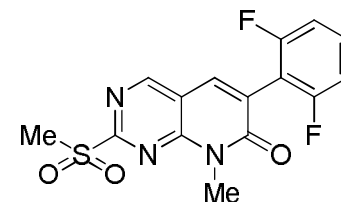

6e  $^{13}\text{C}$ -NMR  
in  $\text{CDCl}_3$ , 100MHz

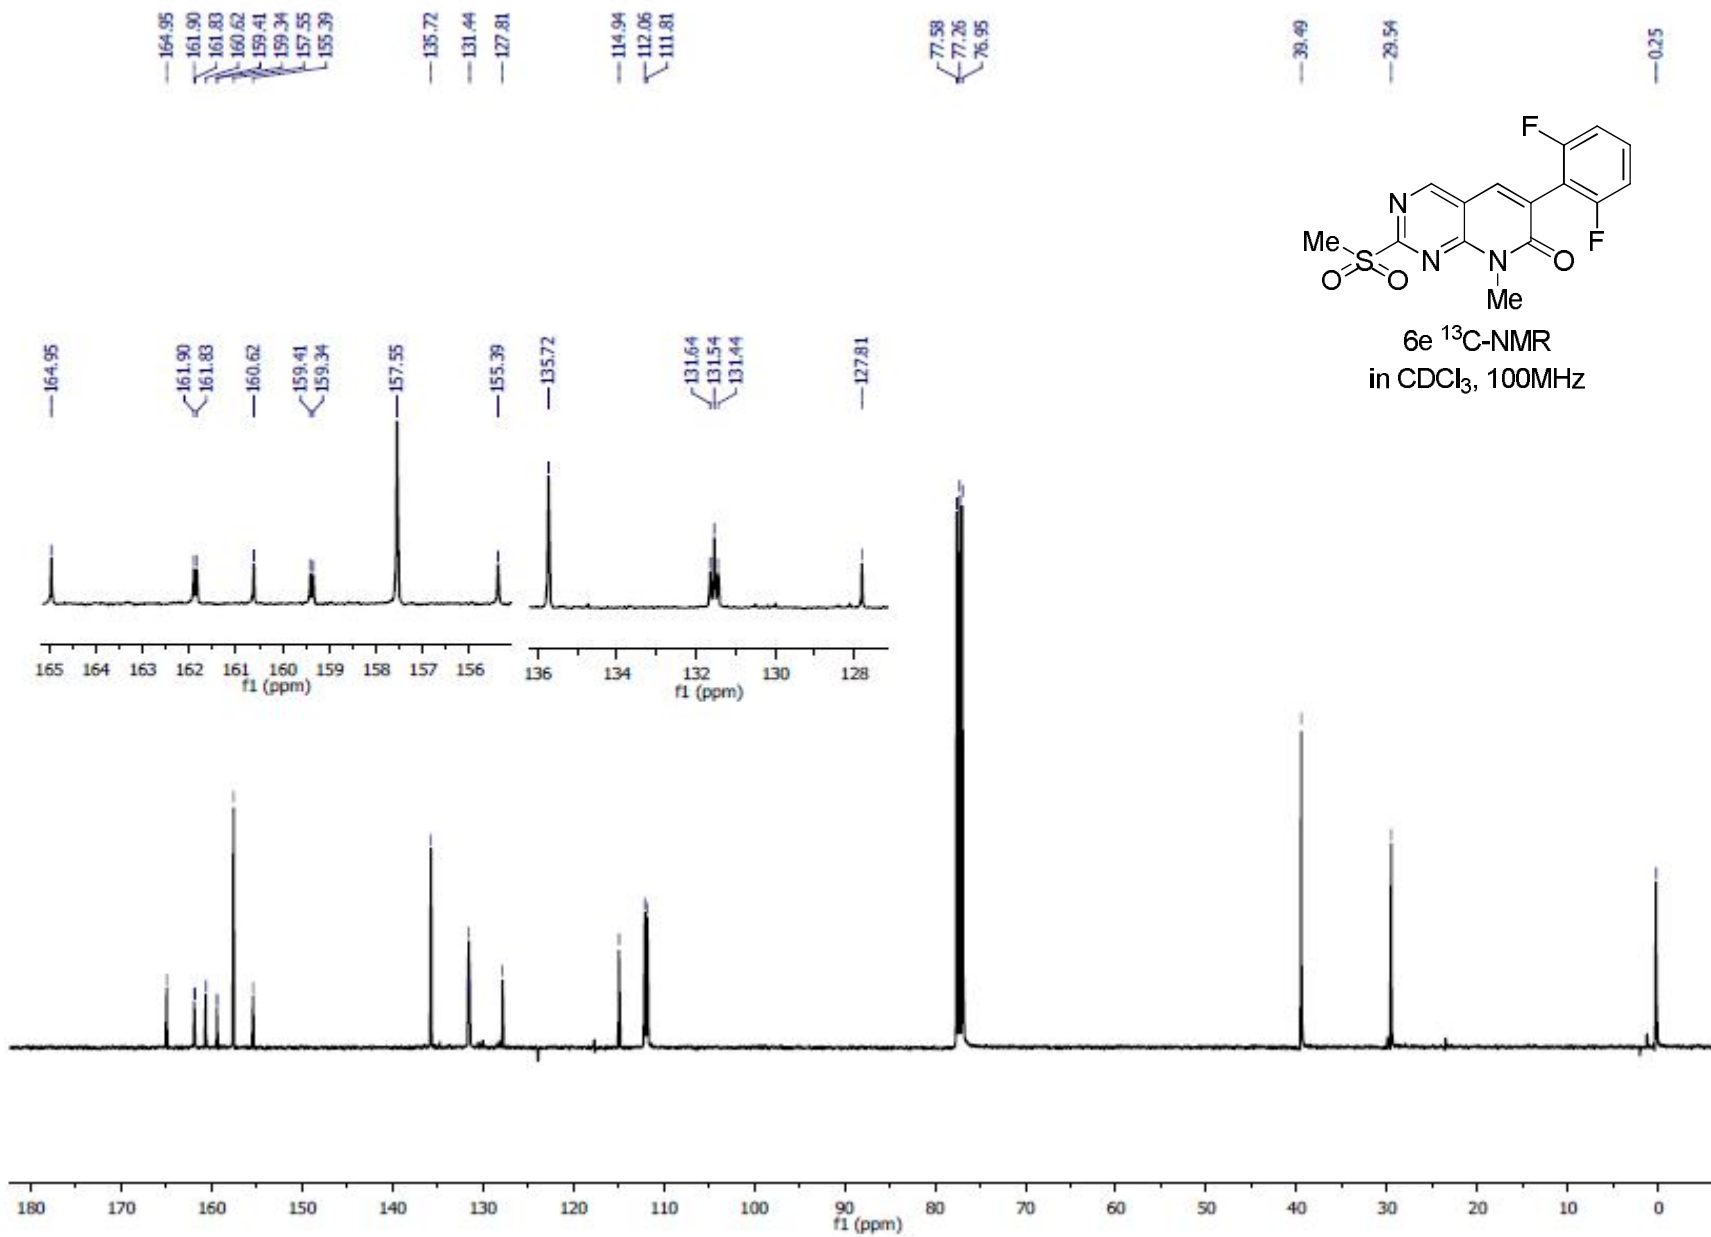

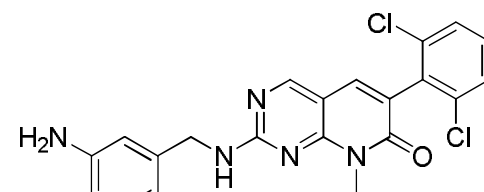

7a <sup>1</sup>H-NMR,  
in CDCl<sub>3</sub>, 400MHz

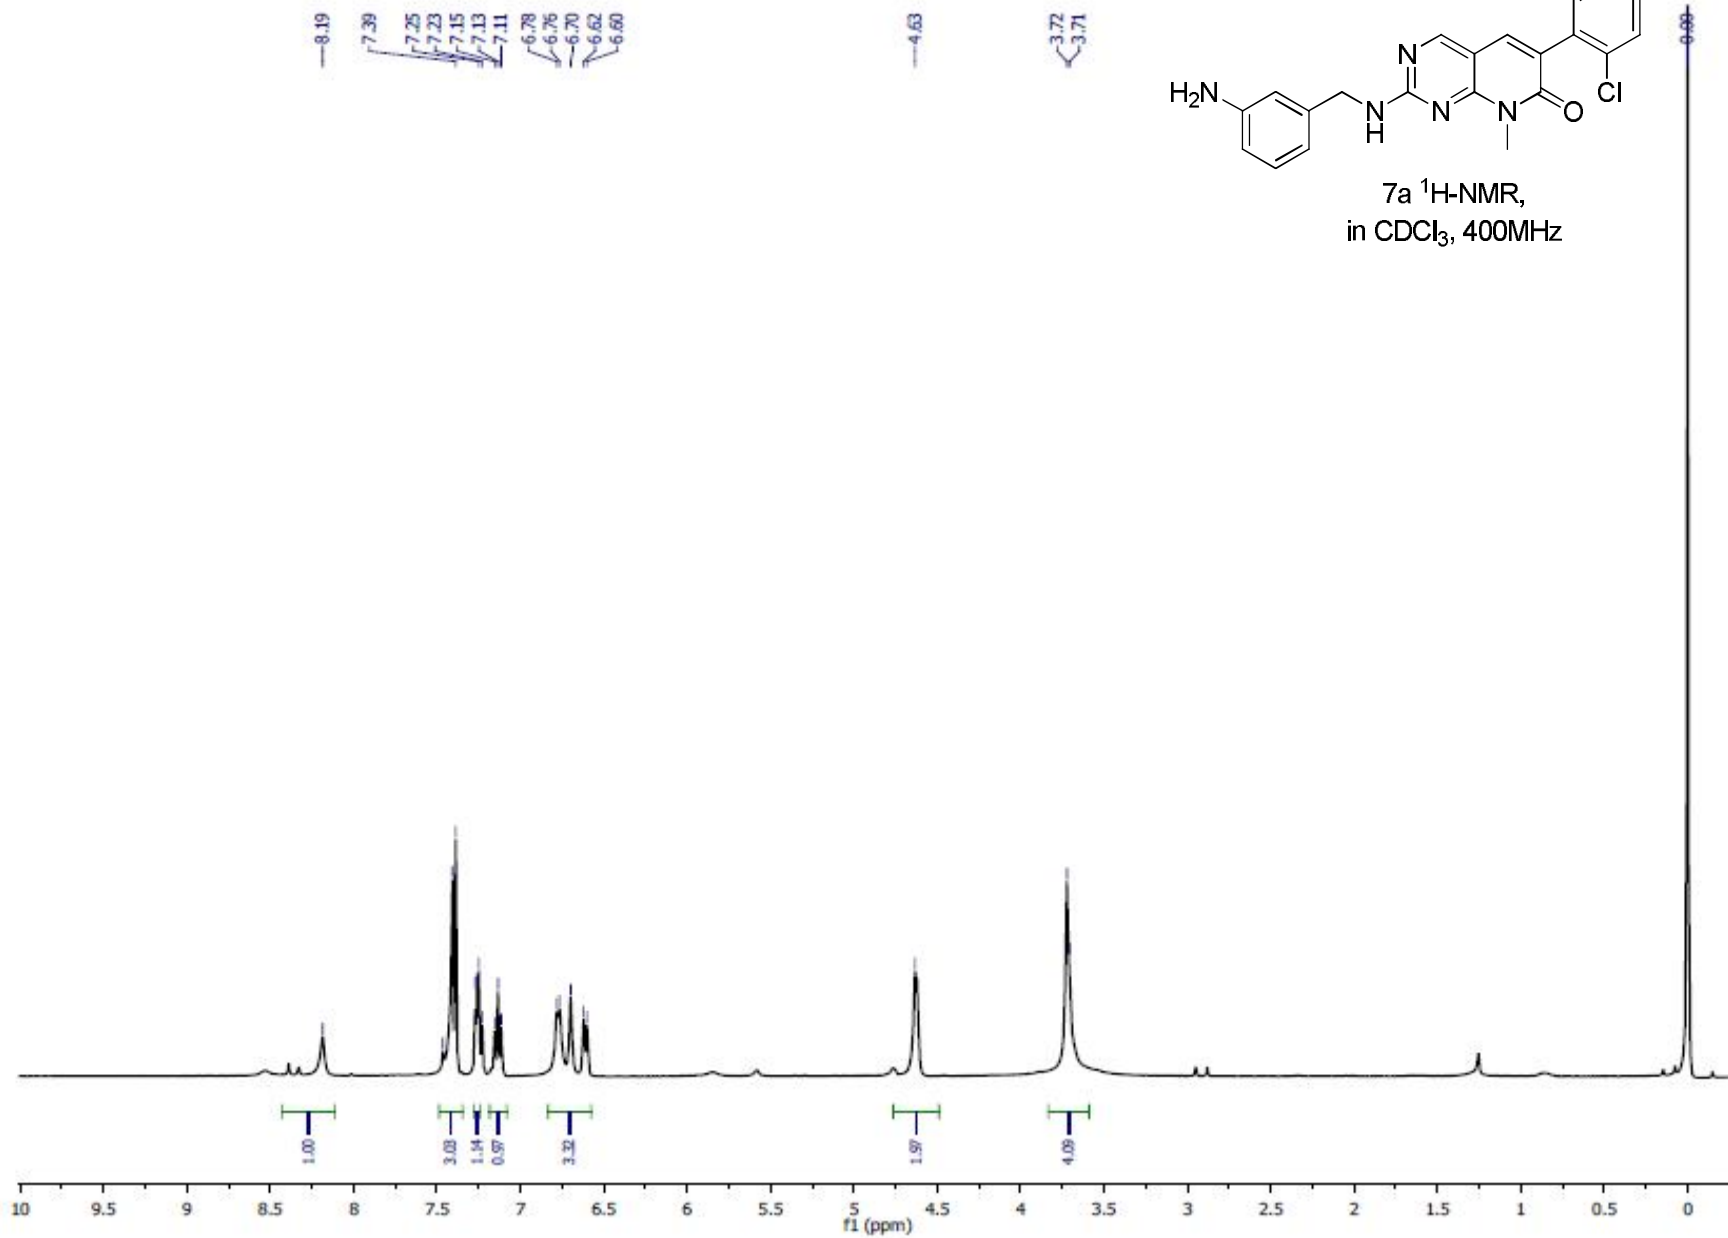

161.72  
161.62  
158.89  
156.27

147.02

139.82

134.61

129.92  
129.86  
128.18

118.11

114.39

105.44

77.59  
77.26  
76.94

46.10

28.40

0.25

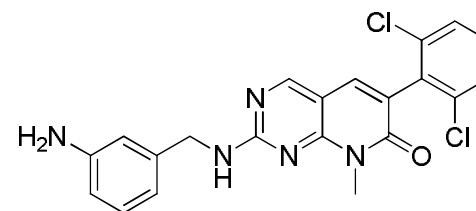

7a <sup>13</sup>C-NMR,  
in CDCl<sub>3</sub>, 100MHz

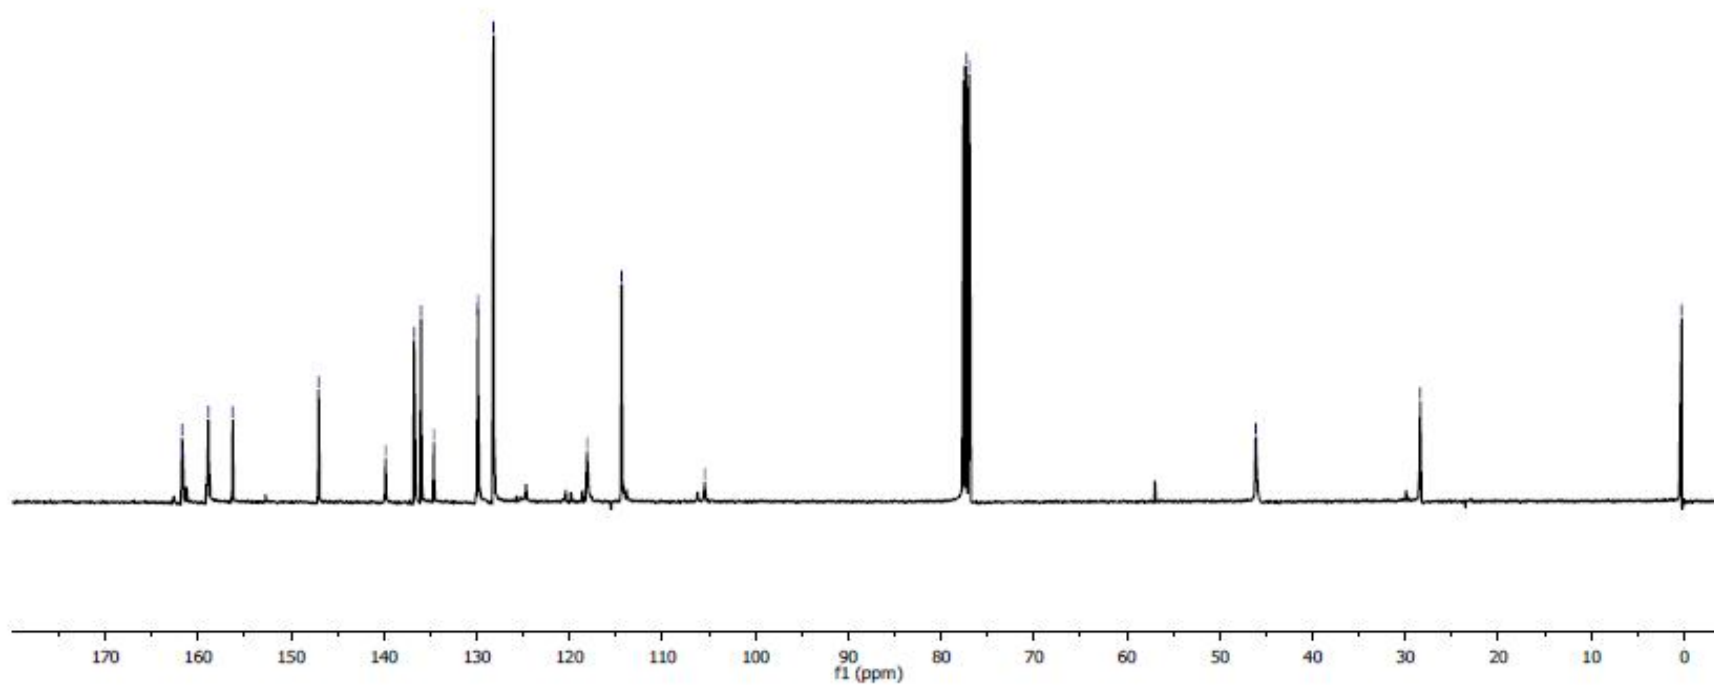

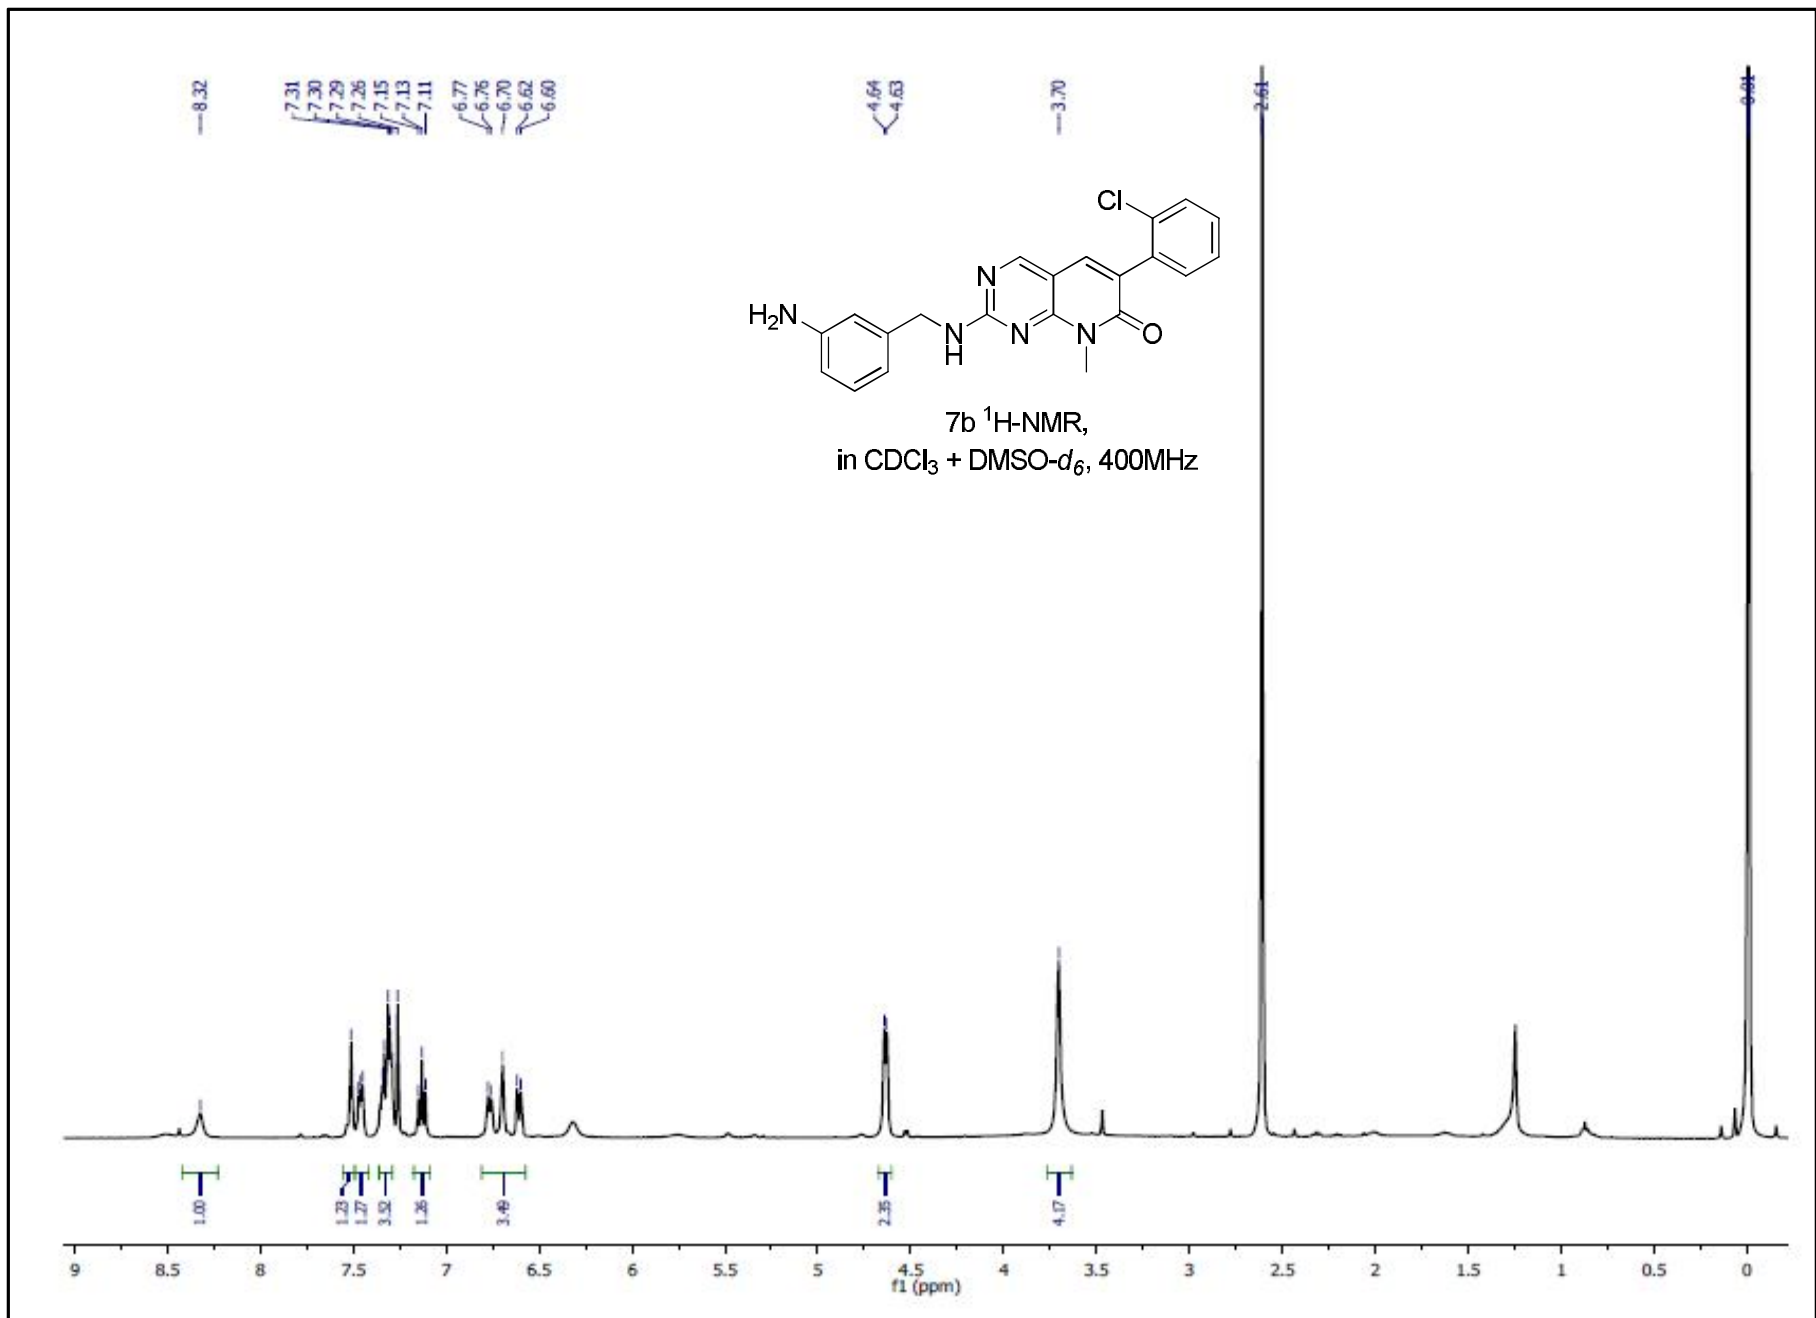



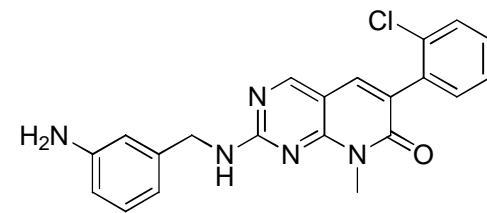

7b  $^{13}\text{C}$ -NMR,  
in  $\text{CDCl}_3$ , 100MHz

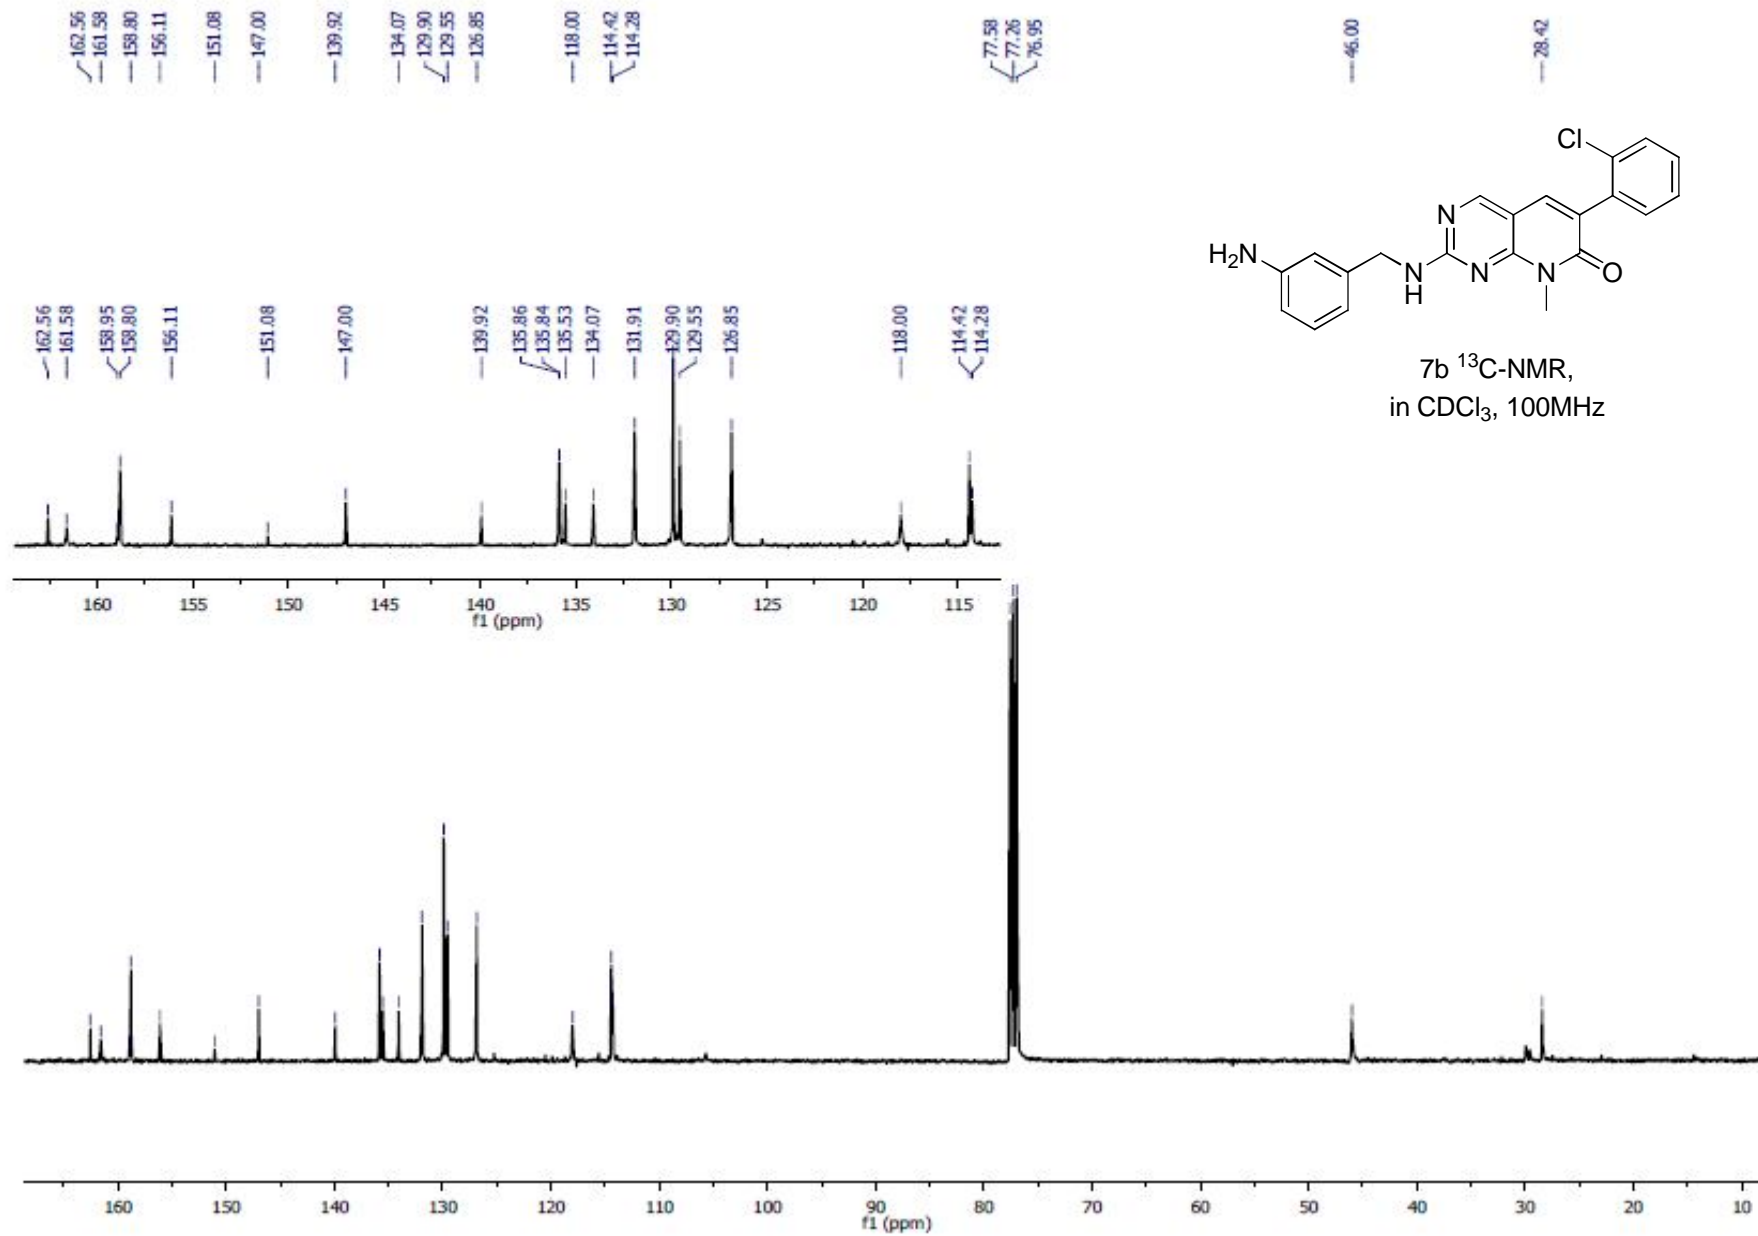

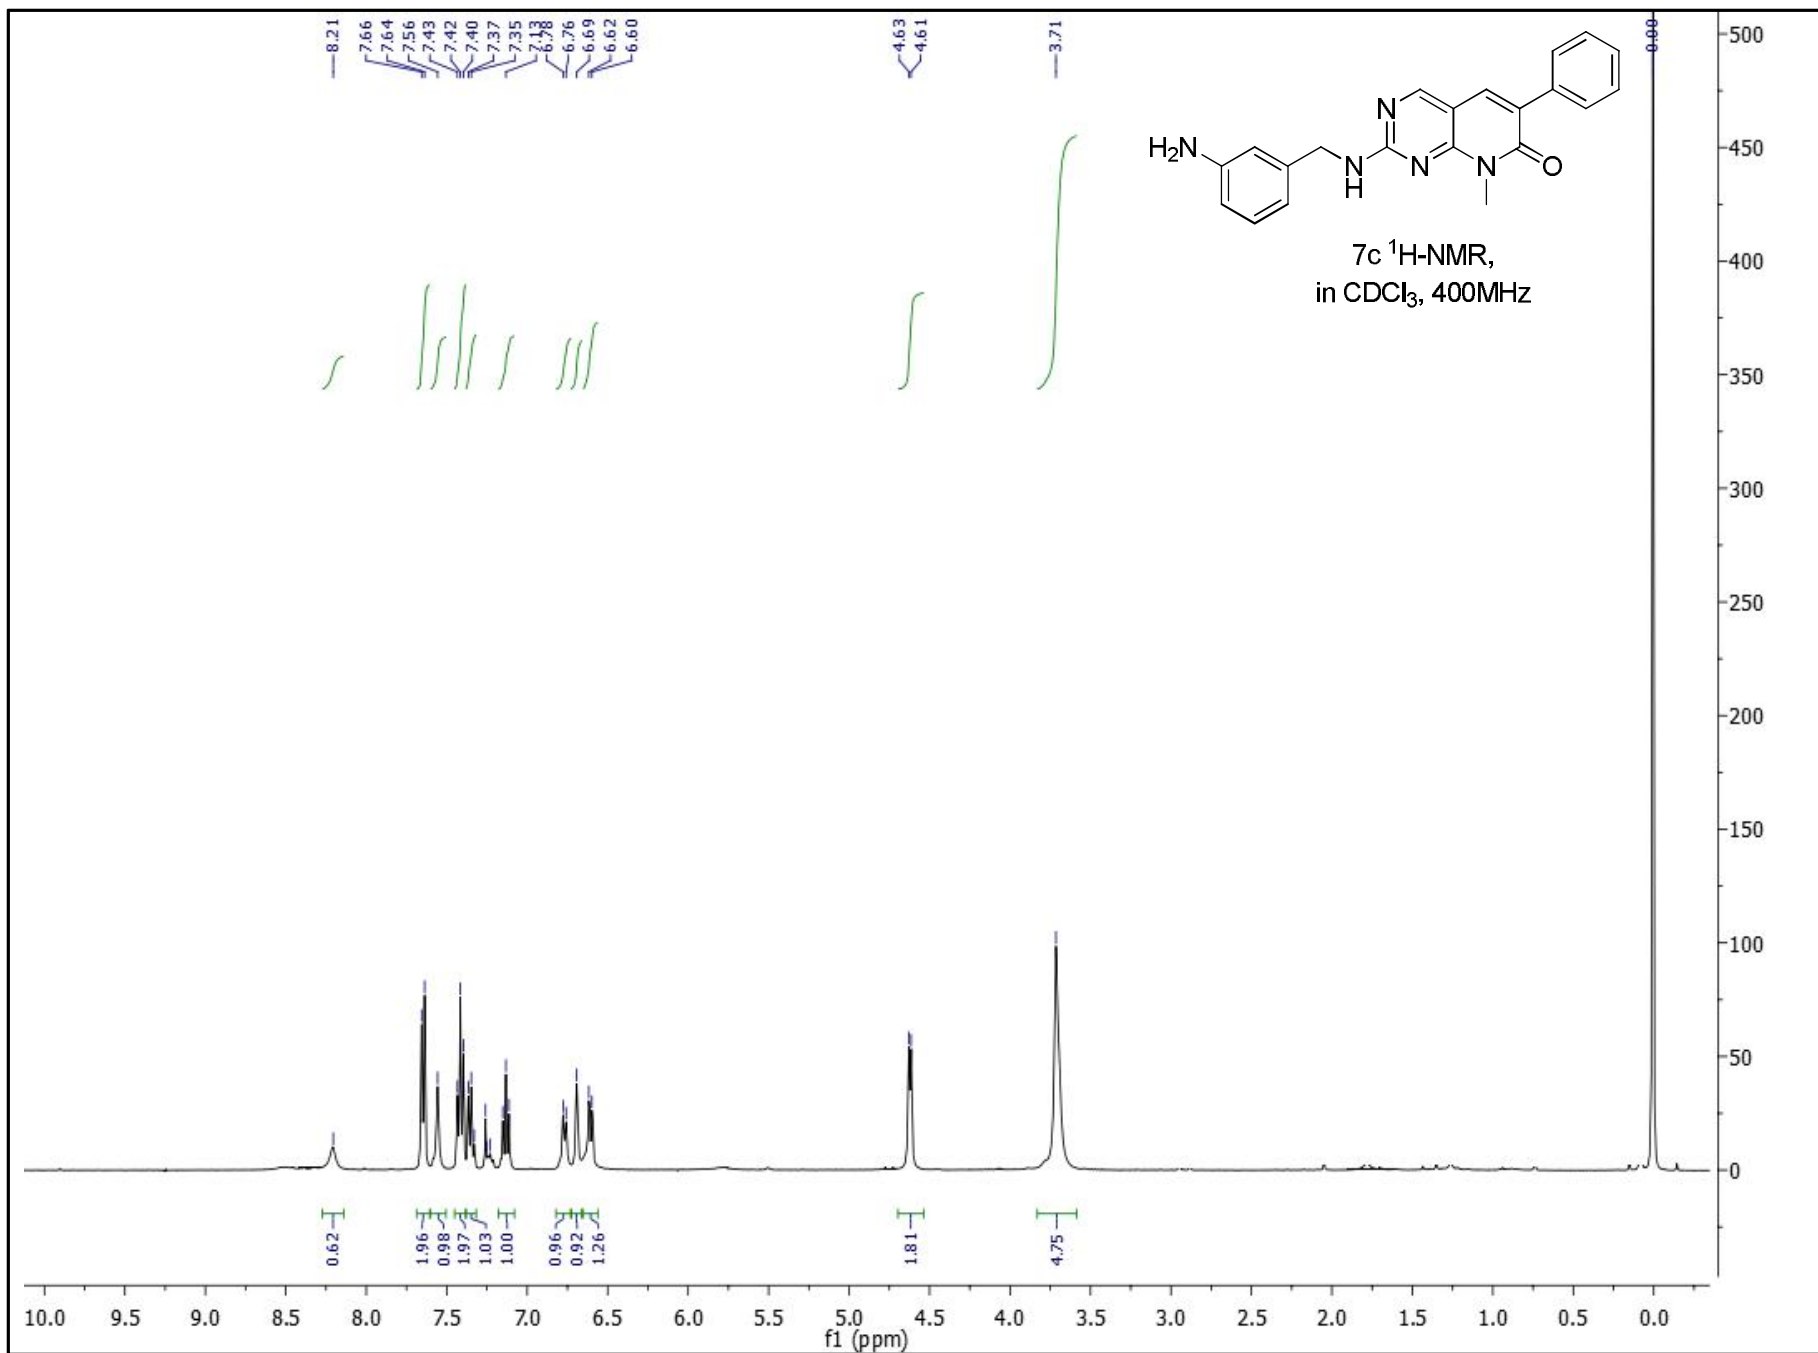

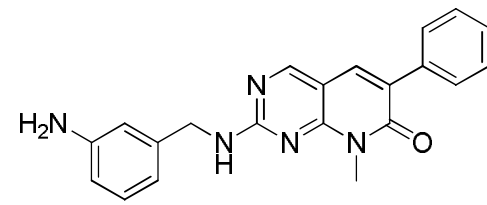

7c <sup>13</sup>C-NMR,  
in CDCl<sub>3</sub>, 100MHz

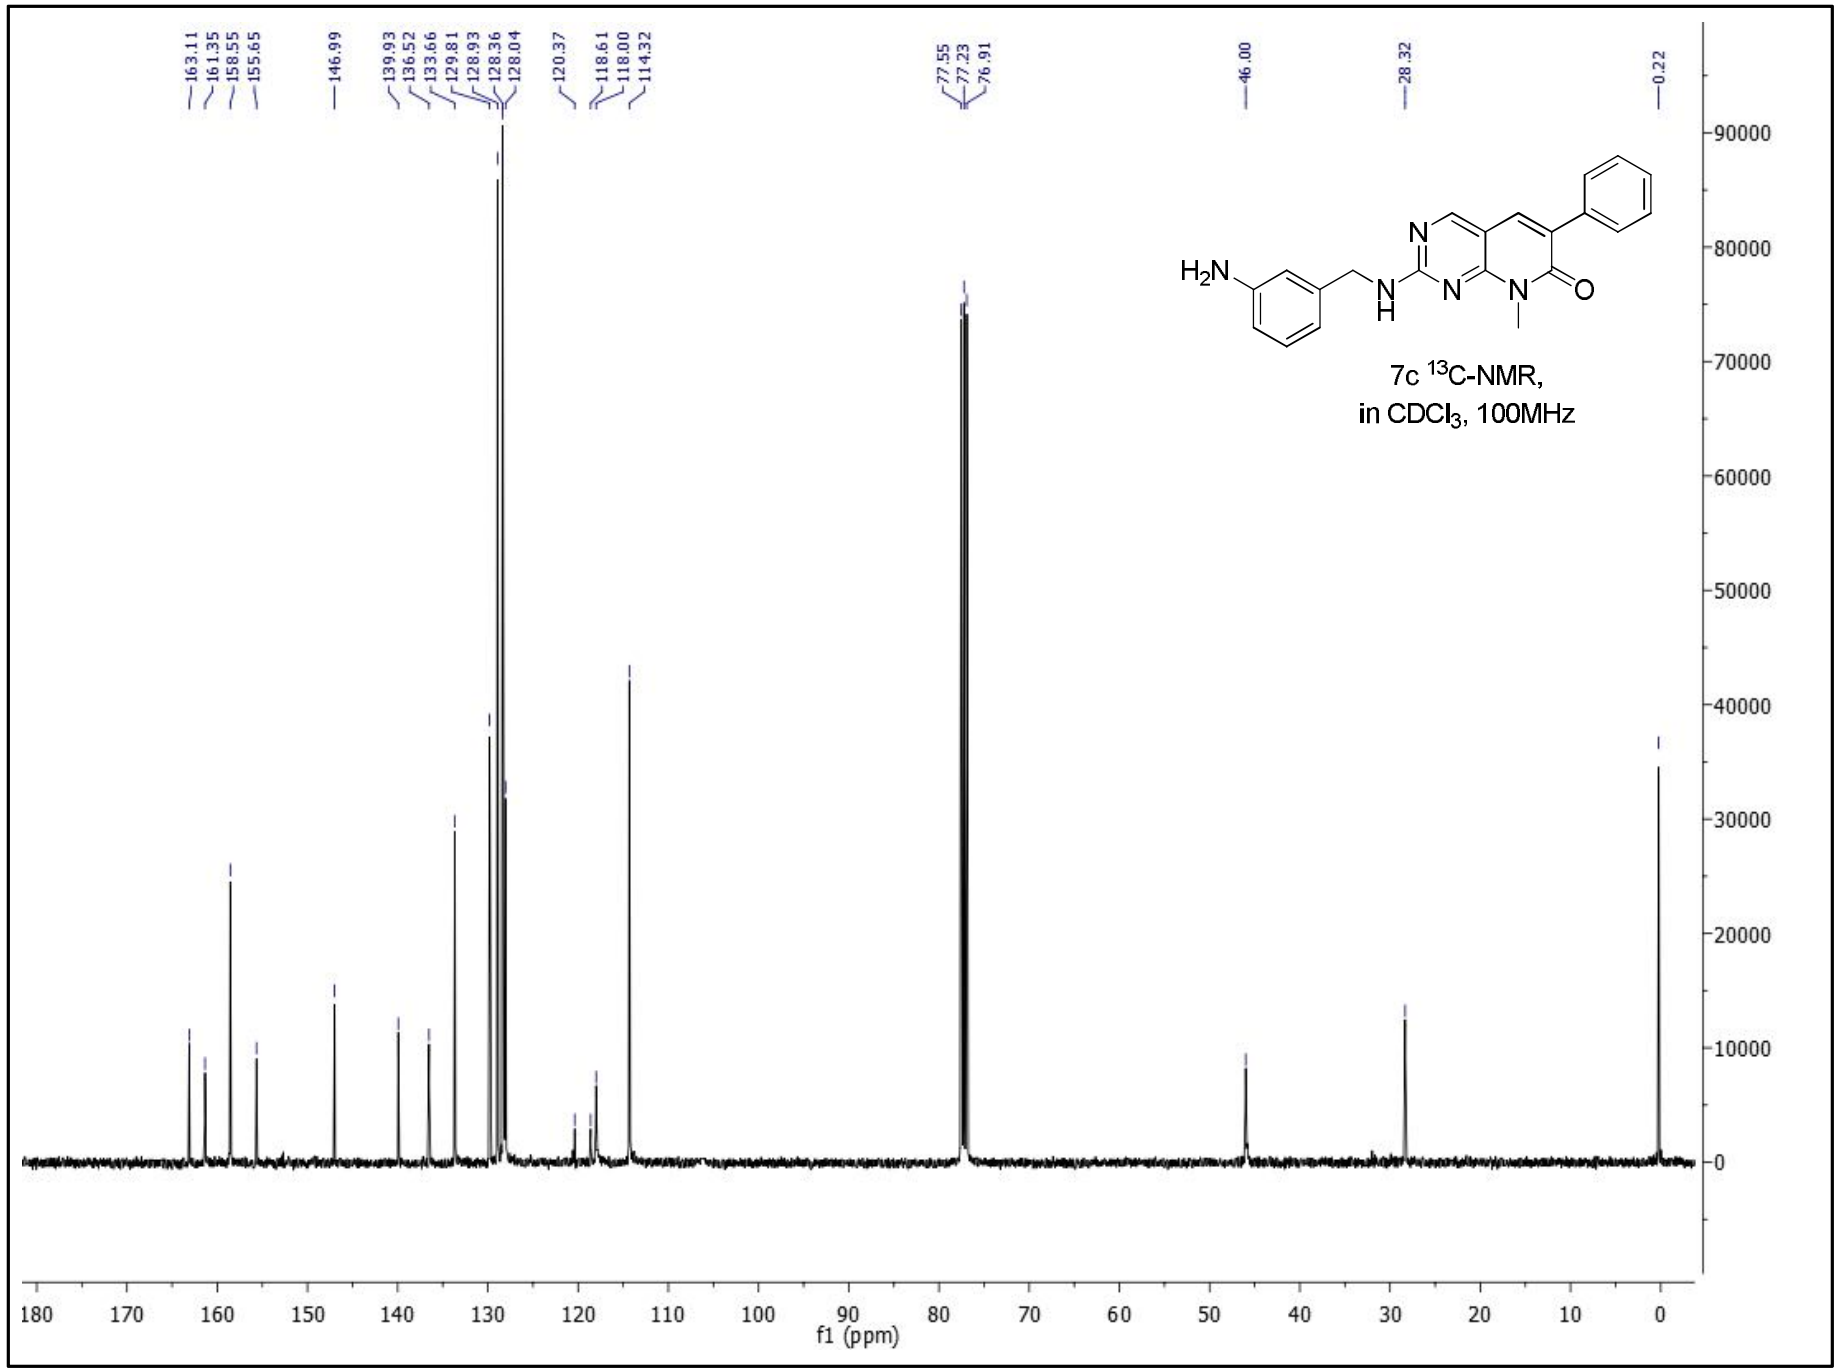

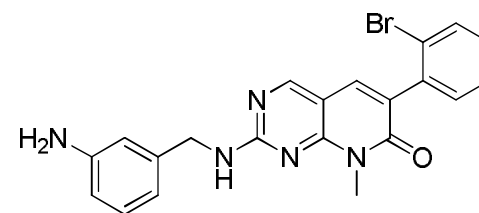

7d <sup>1</sup>H-NMR,  
in CDCl<sub>3</sub>, 400MHz

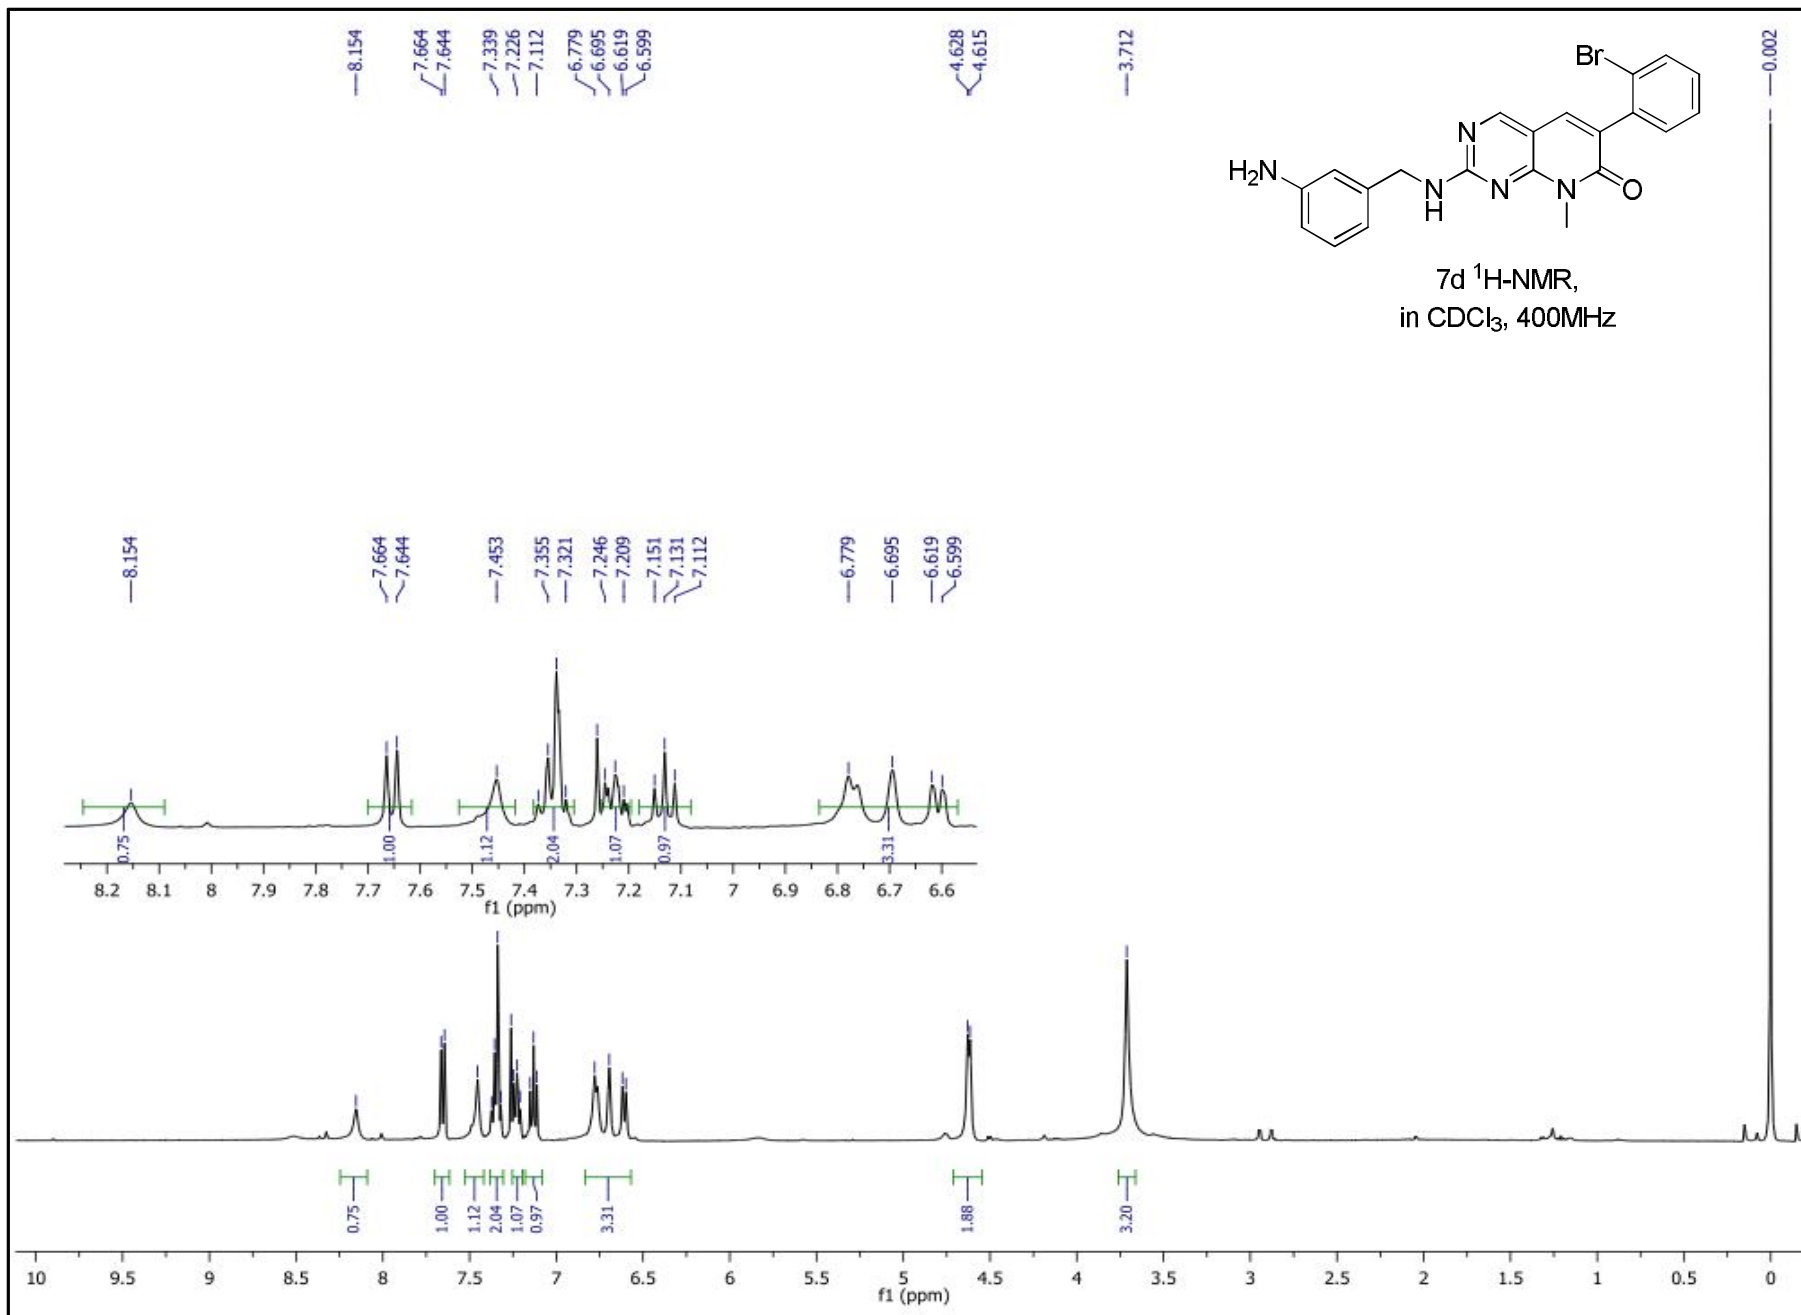

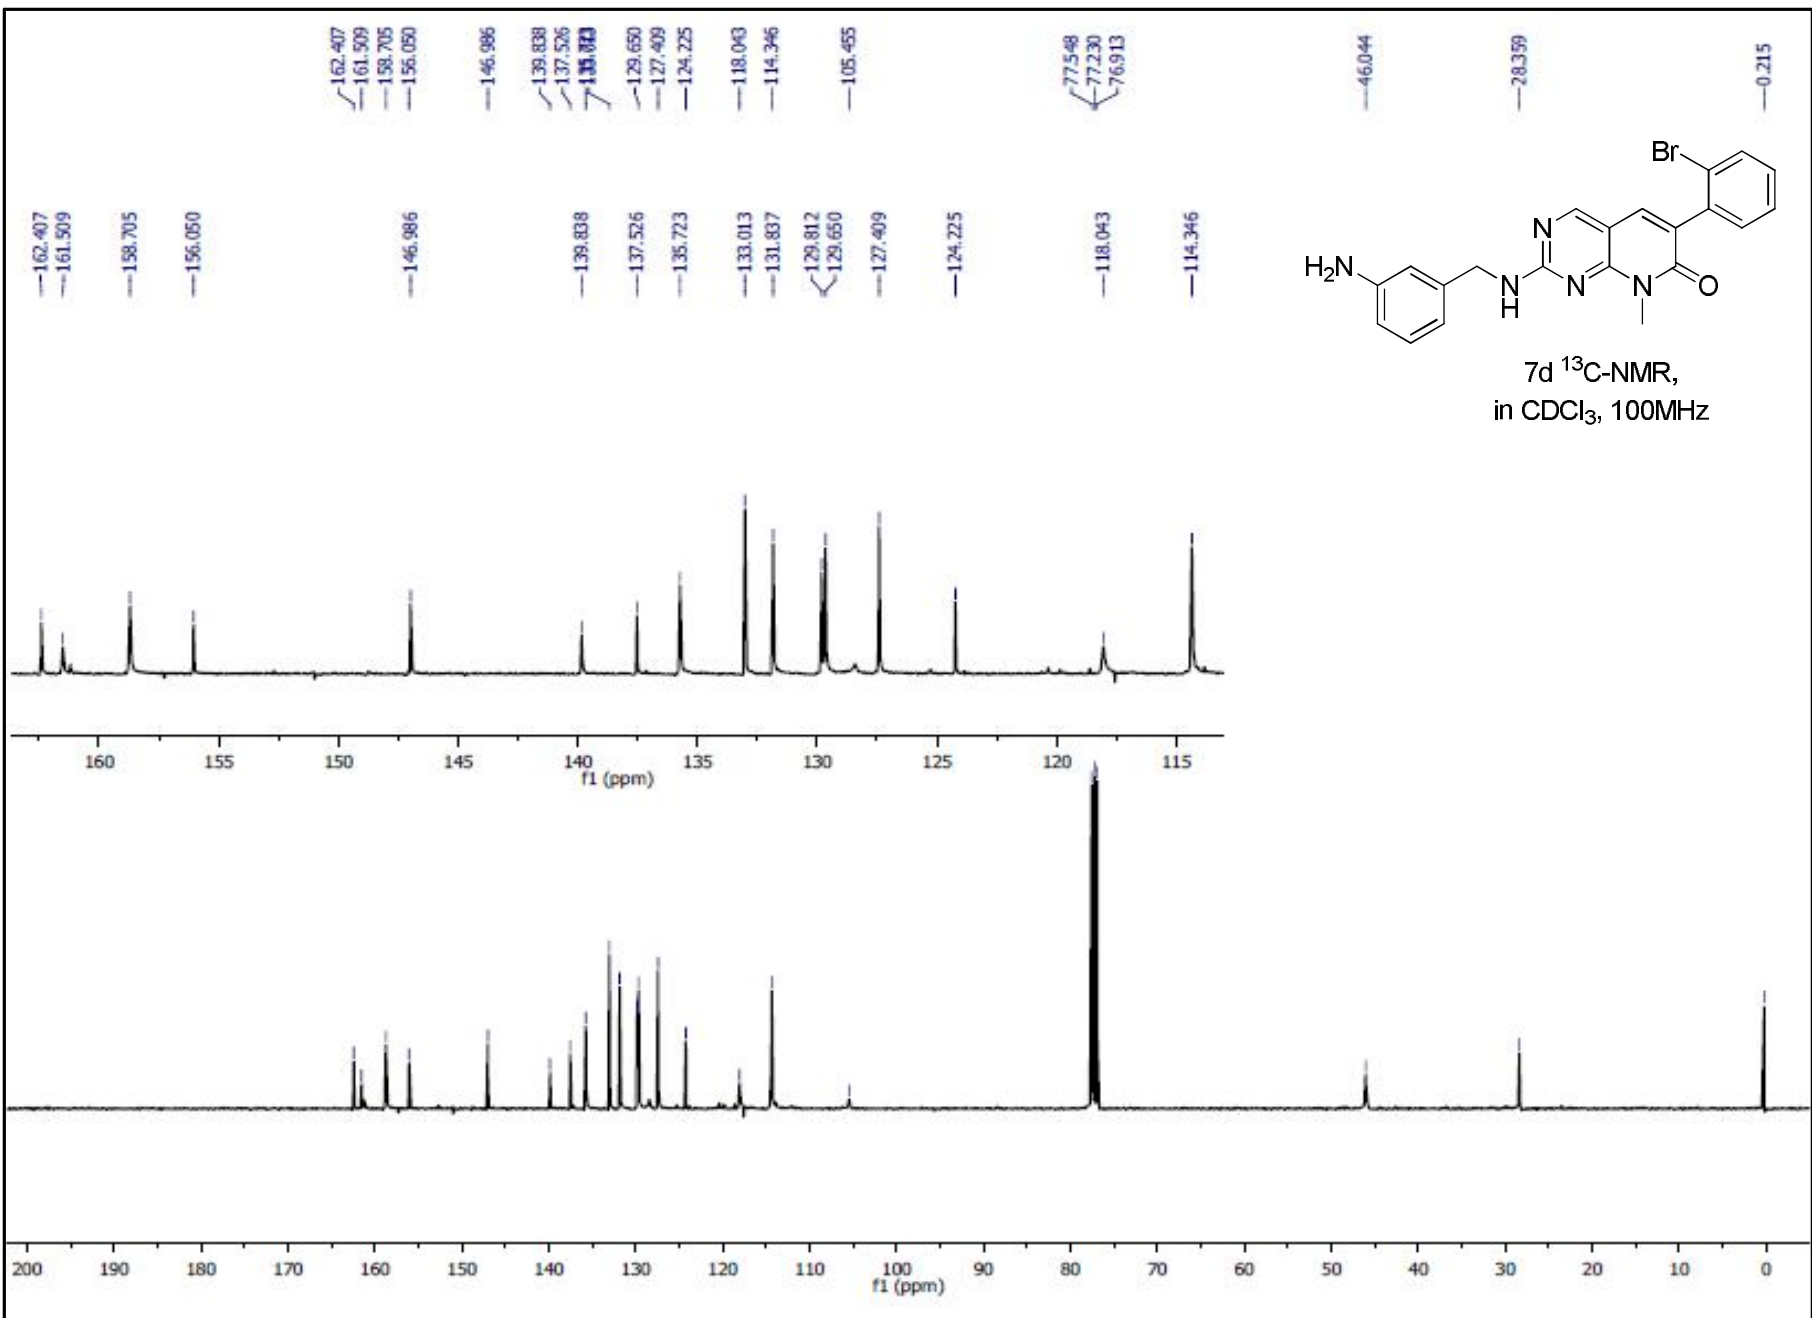

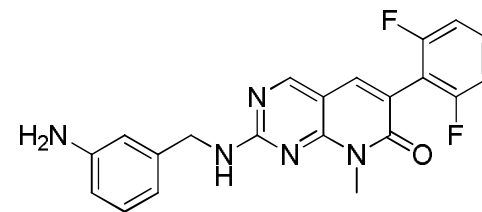

7e  $^{13}\text{C}$ -NMR,  
in  $\text{DMSO-}d_6$ , 100MHz

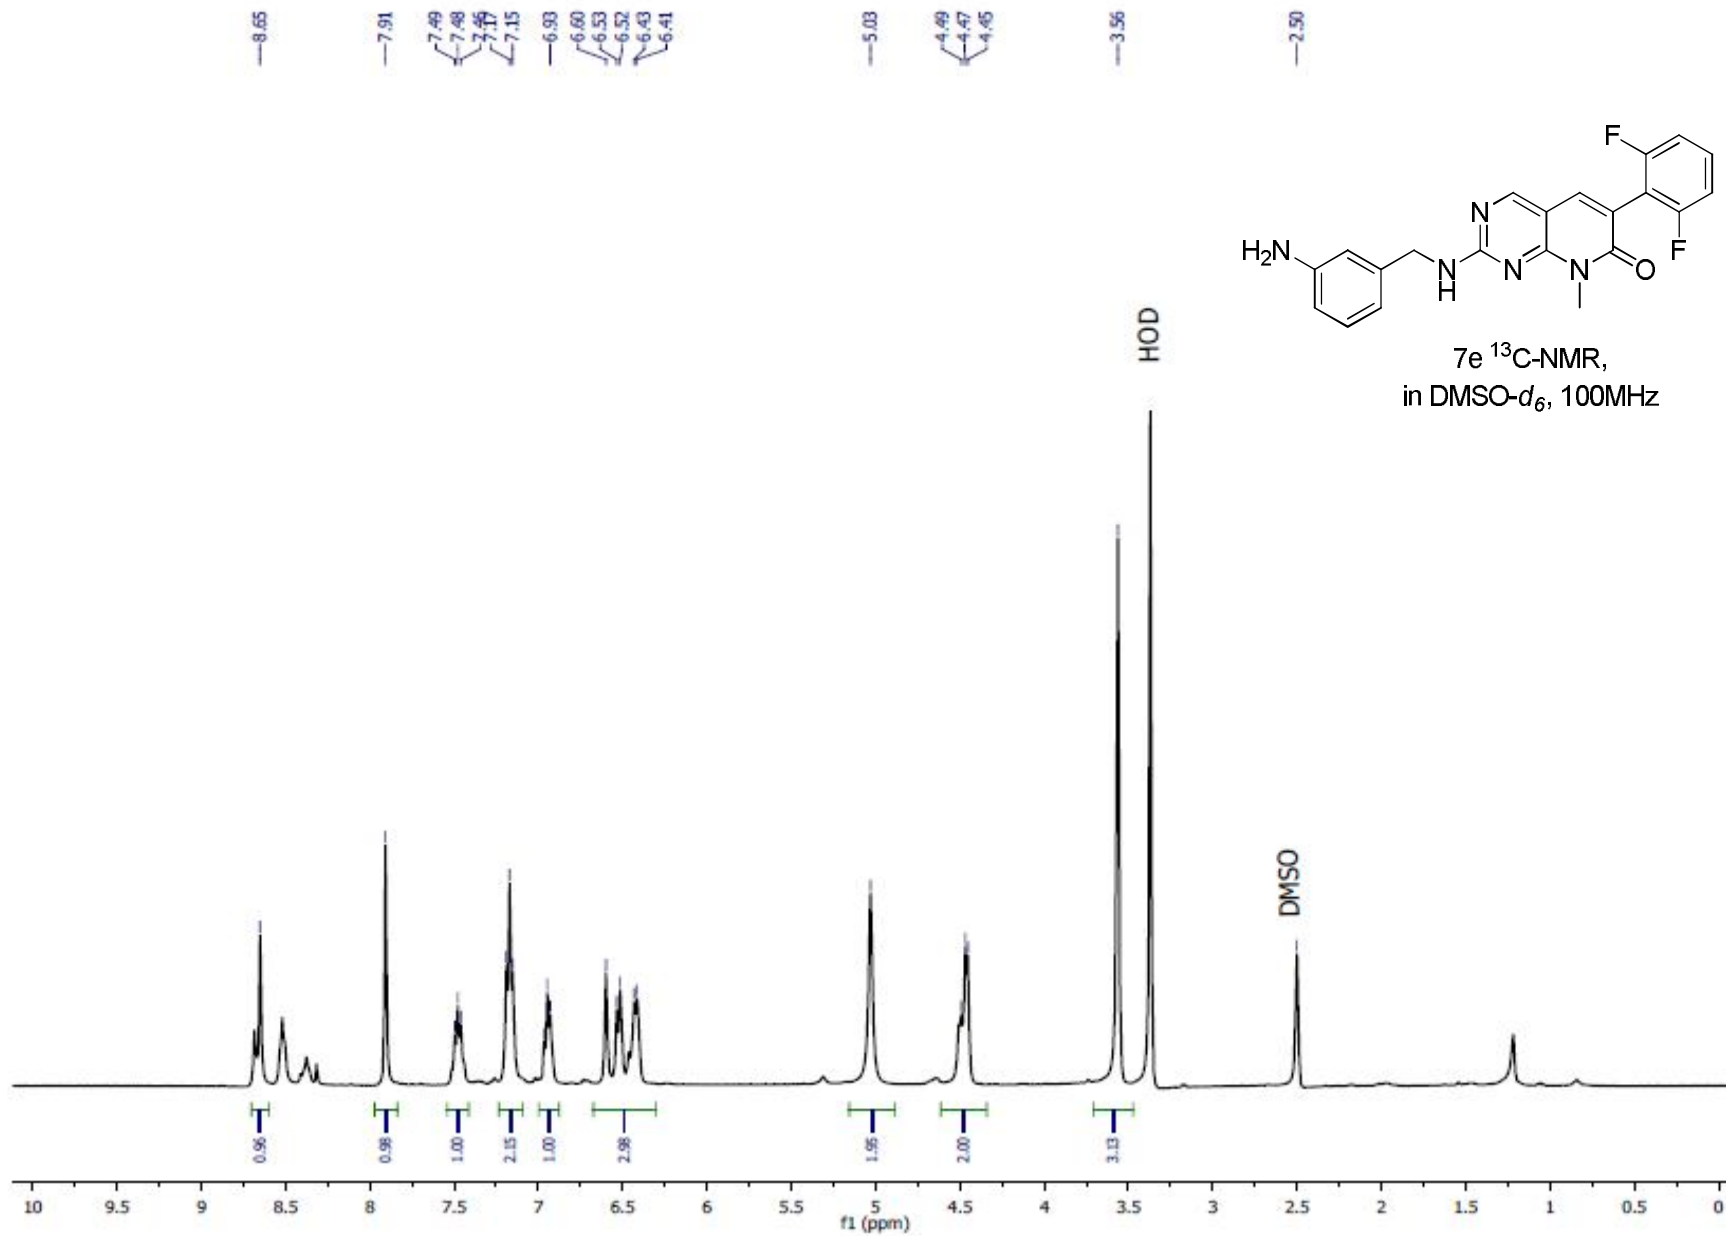

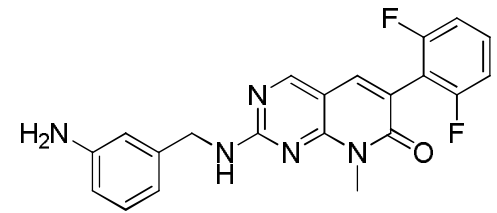

7e  $^1\text{H-NMR}$ ,  
in  $\text{DMSO-}d_6$ , 400MHz

161.55  
160.91  
160.83  
159.62  
159.02  
158.95  
155.37  
148.63  
140.32  
140.13  
138.13  
130.43  
130.33  
130.23  
128.71  
112.84  
112.32  
112.27  
111.65  
111.59  
111.46  
111.40  
104.20

44.64  
38.72  
38.51  
38.30  
38.09  
38.88  
27.71

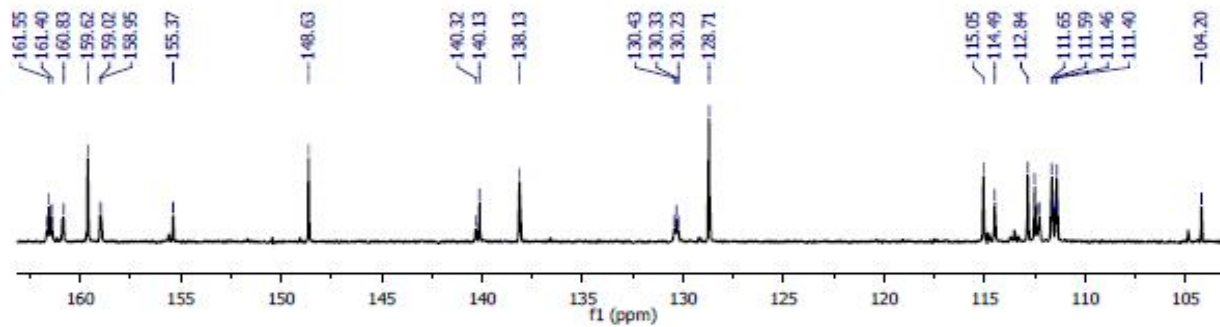

161.55  
161.40  
160.83  
159.62  
159.02  
158.95  
155.37

148.63

140.32  
140.13  
138.13

130.43  
130.33  
130.23  
128.71

115.05  
114.49  
112.84

111.65  
111.59  
111.46  
111.40

104.20

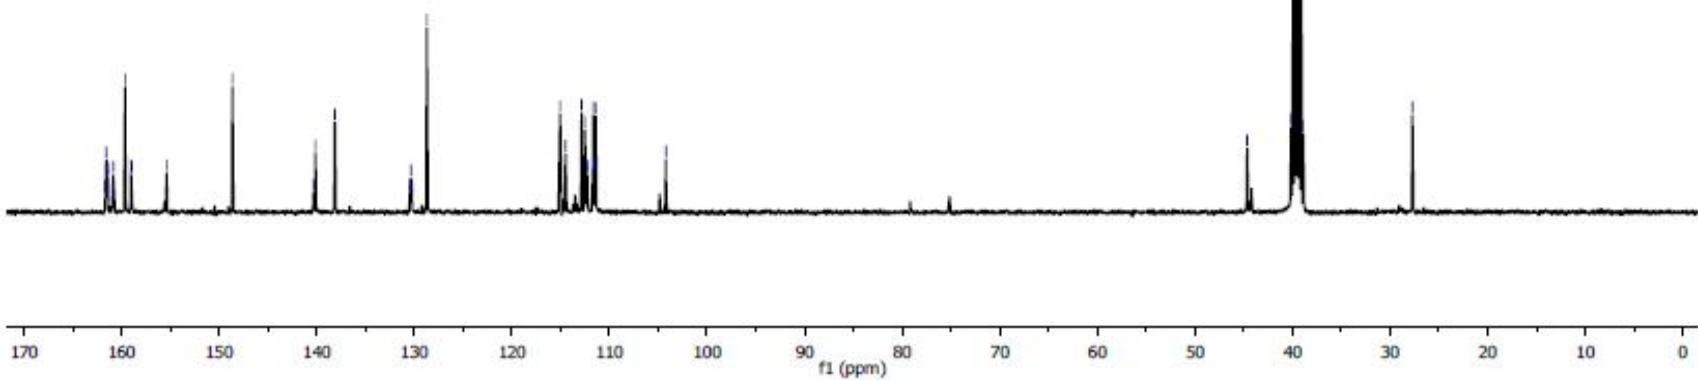

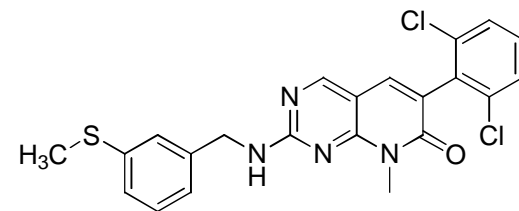

8a <sup>1</sup>H-NMR,  
in CDCl<sub>3</sub>, 400MHz

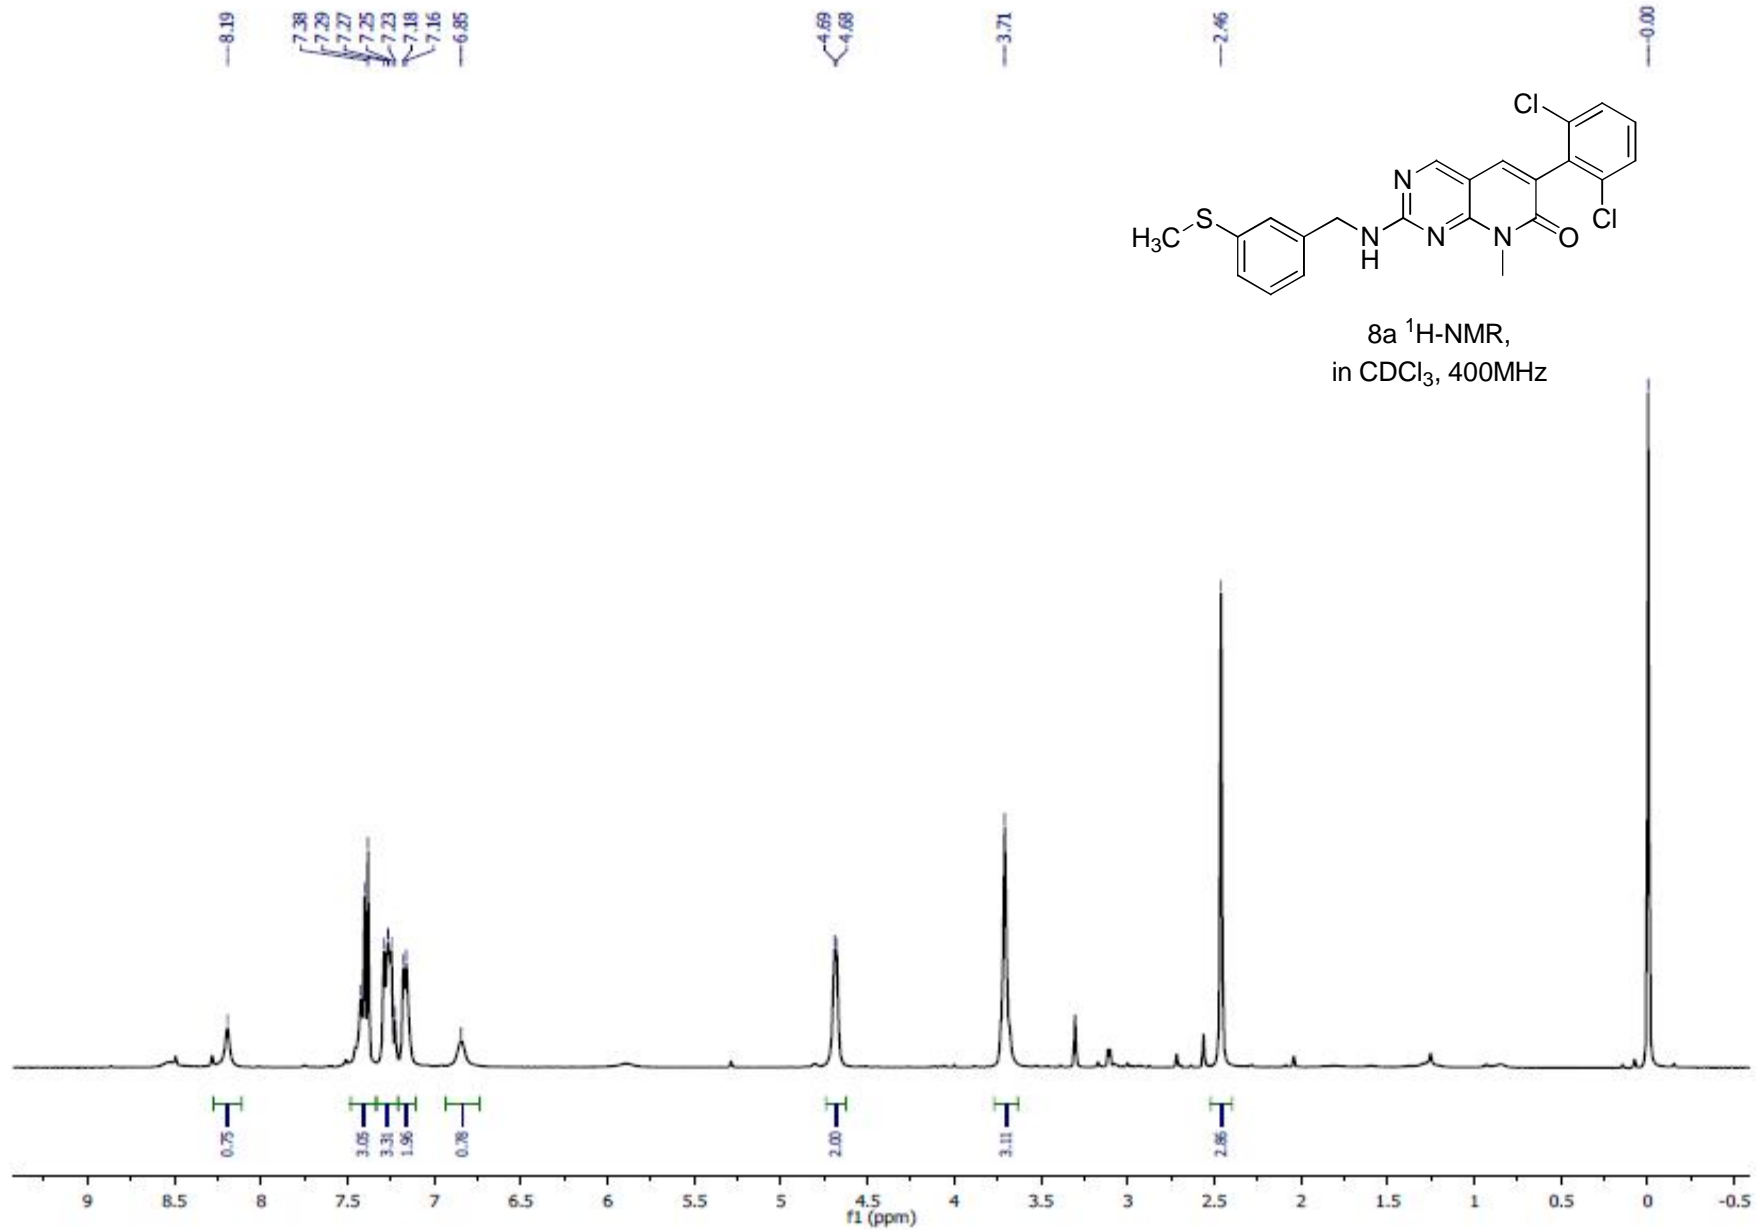



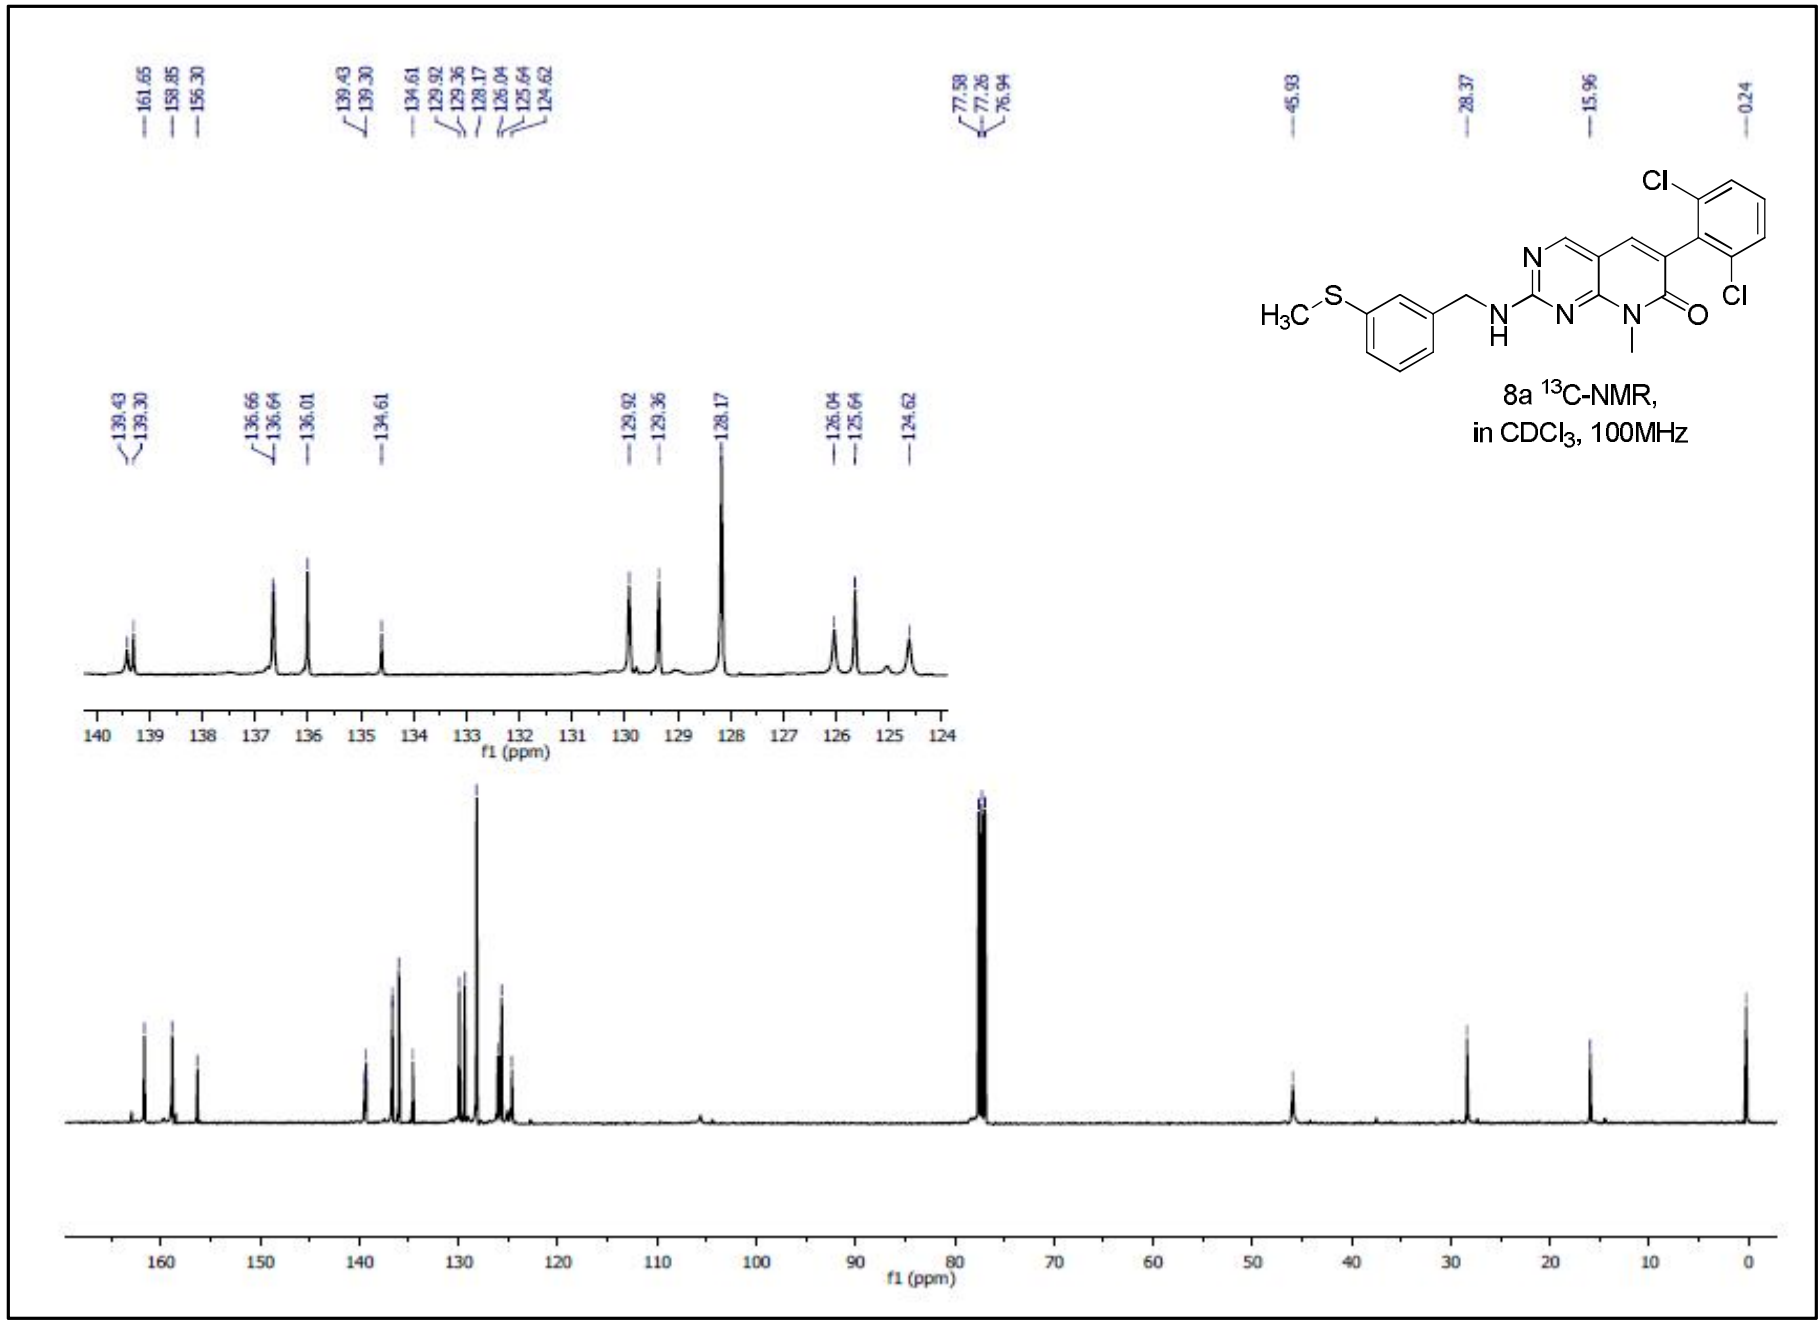

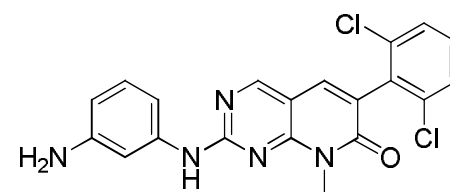

9a <sup>1</sup>H-NMR,  
in CDCl<sub>3</sub>, 400MHz

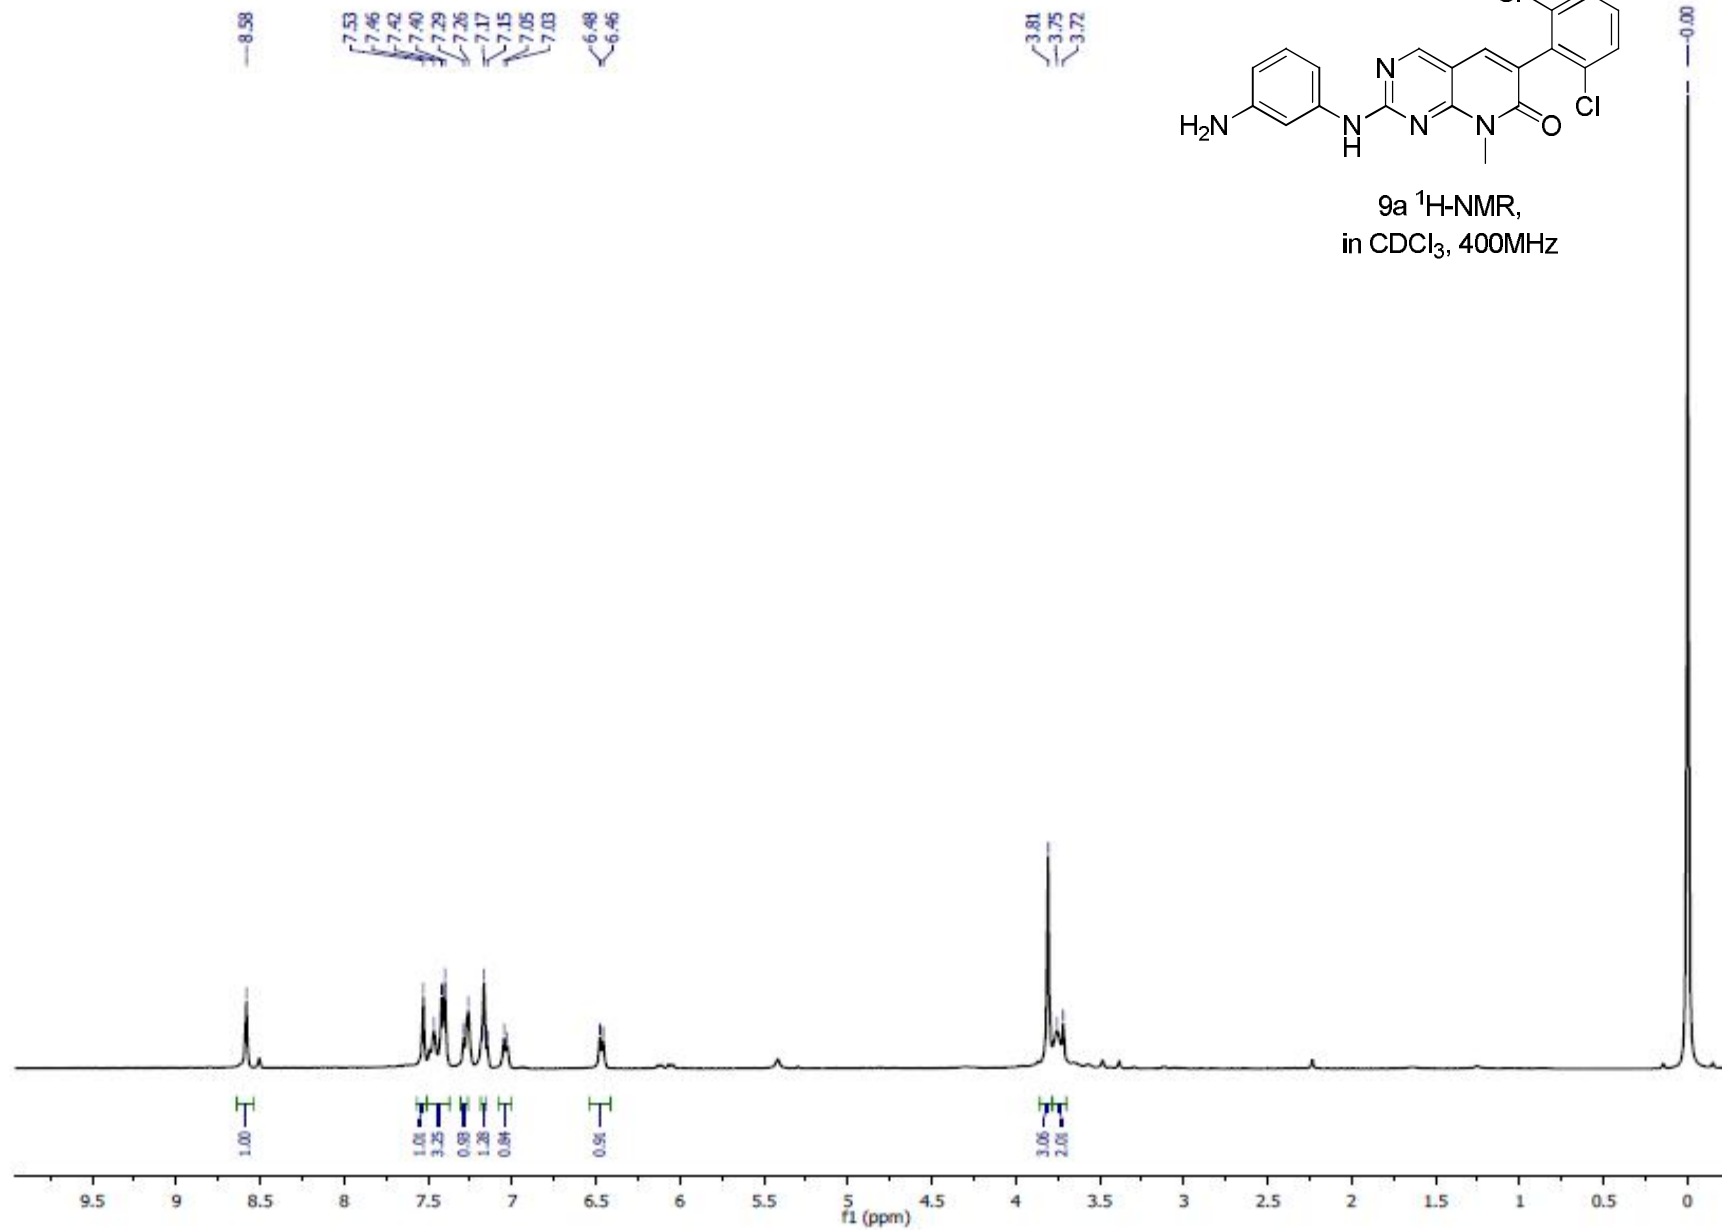

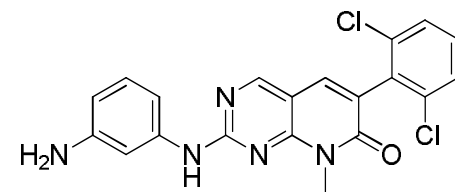

9a  $^{13}\text{C}$ -NMR,  
in  $\text{CDCl}_3$ , 100MHz

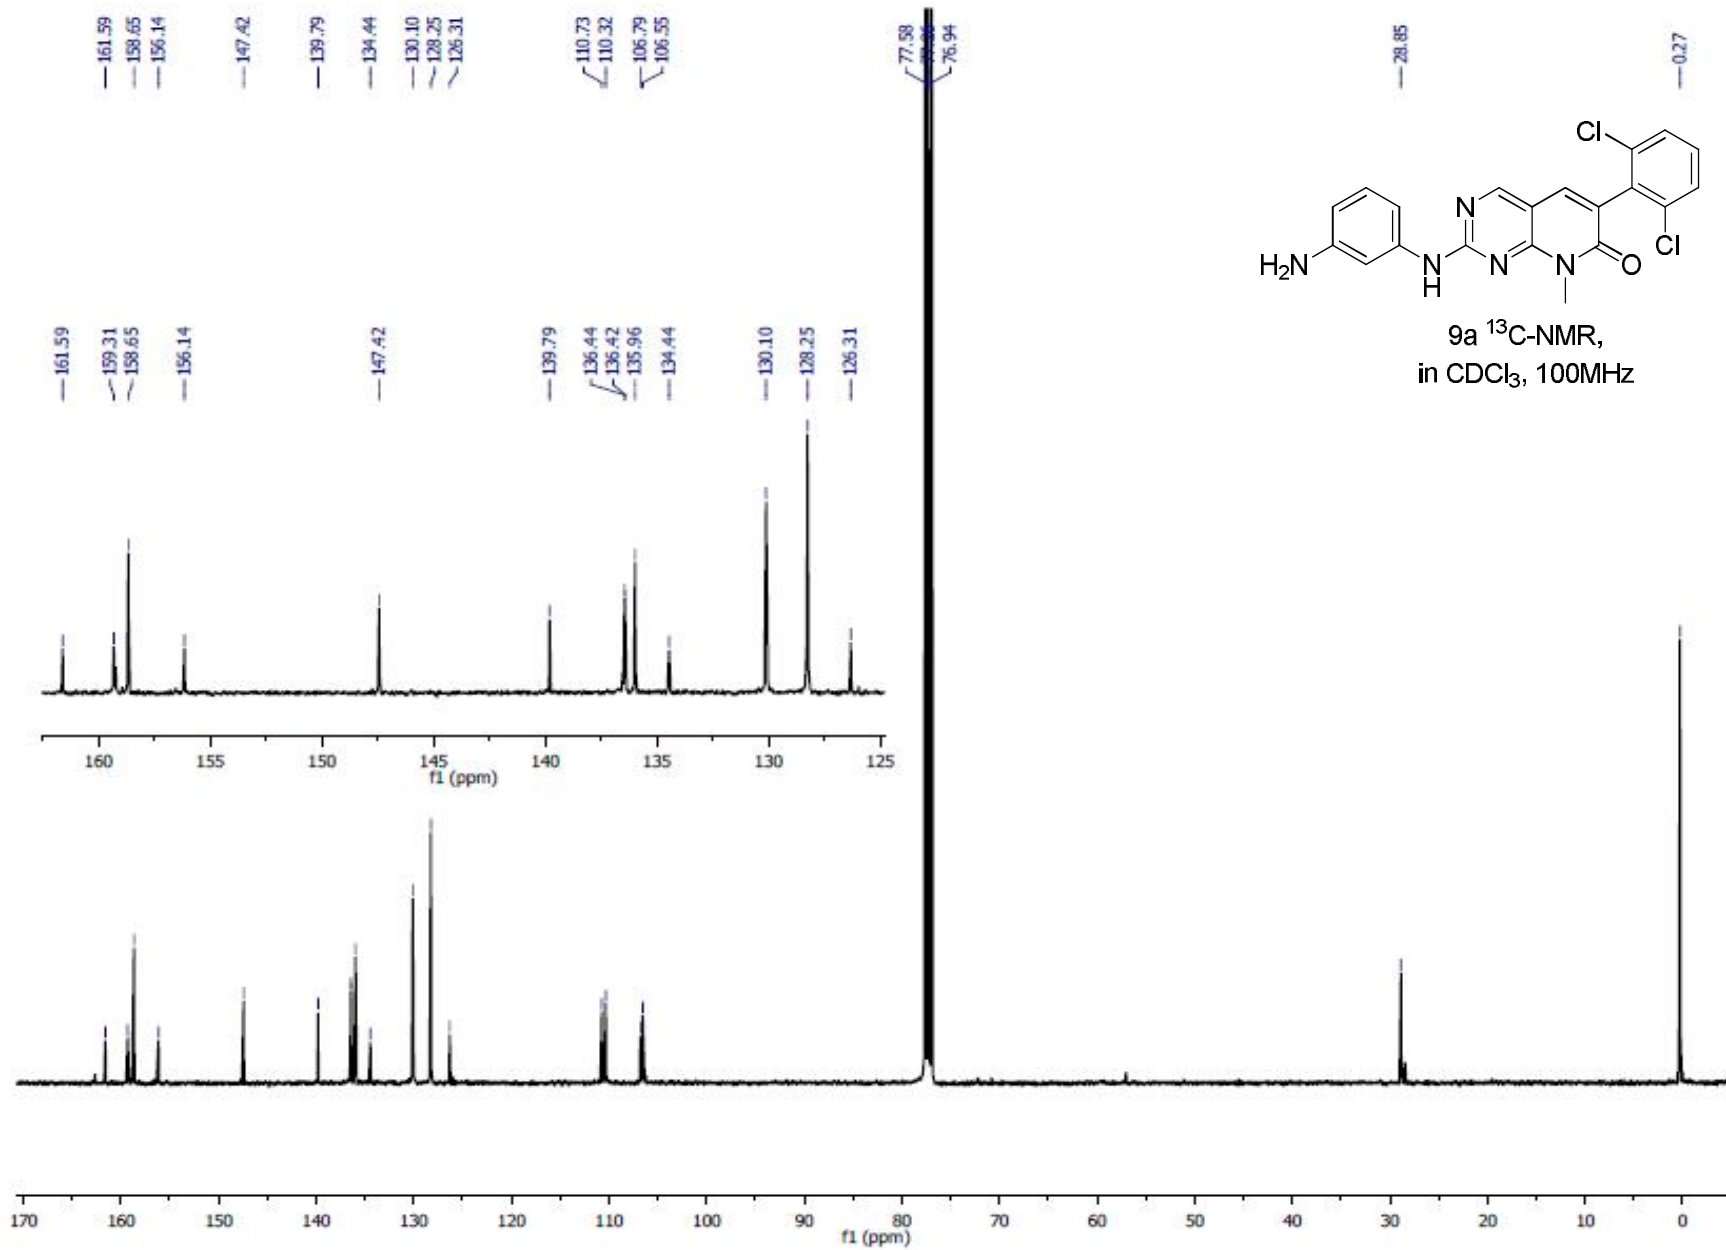

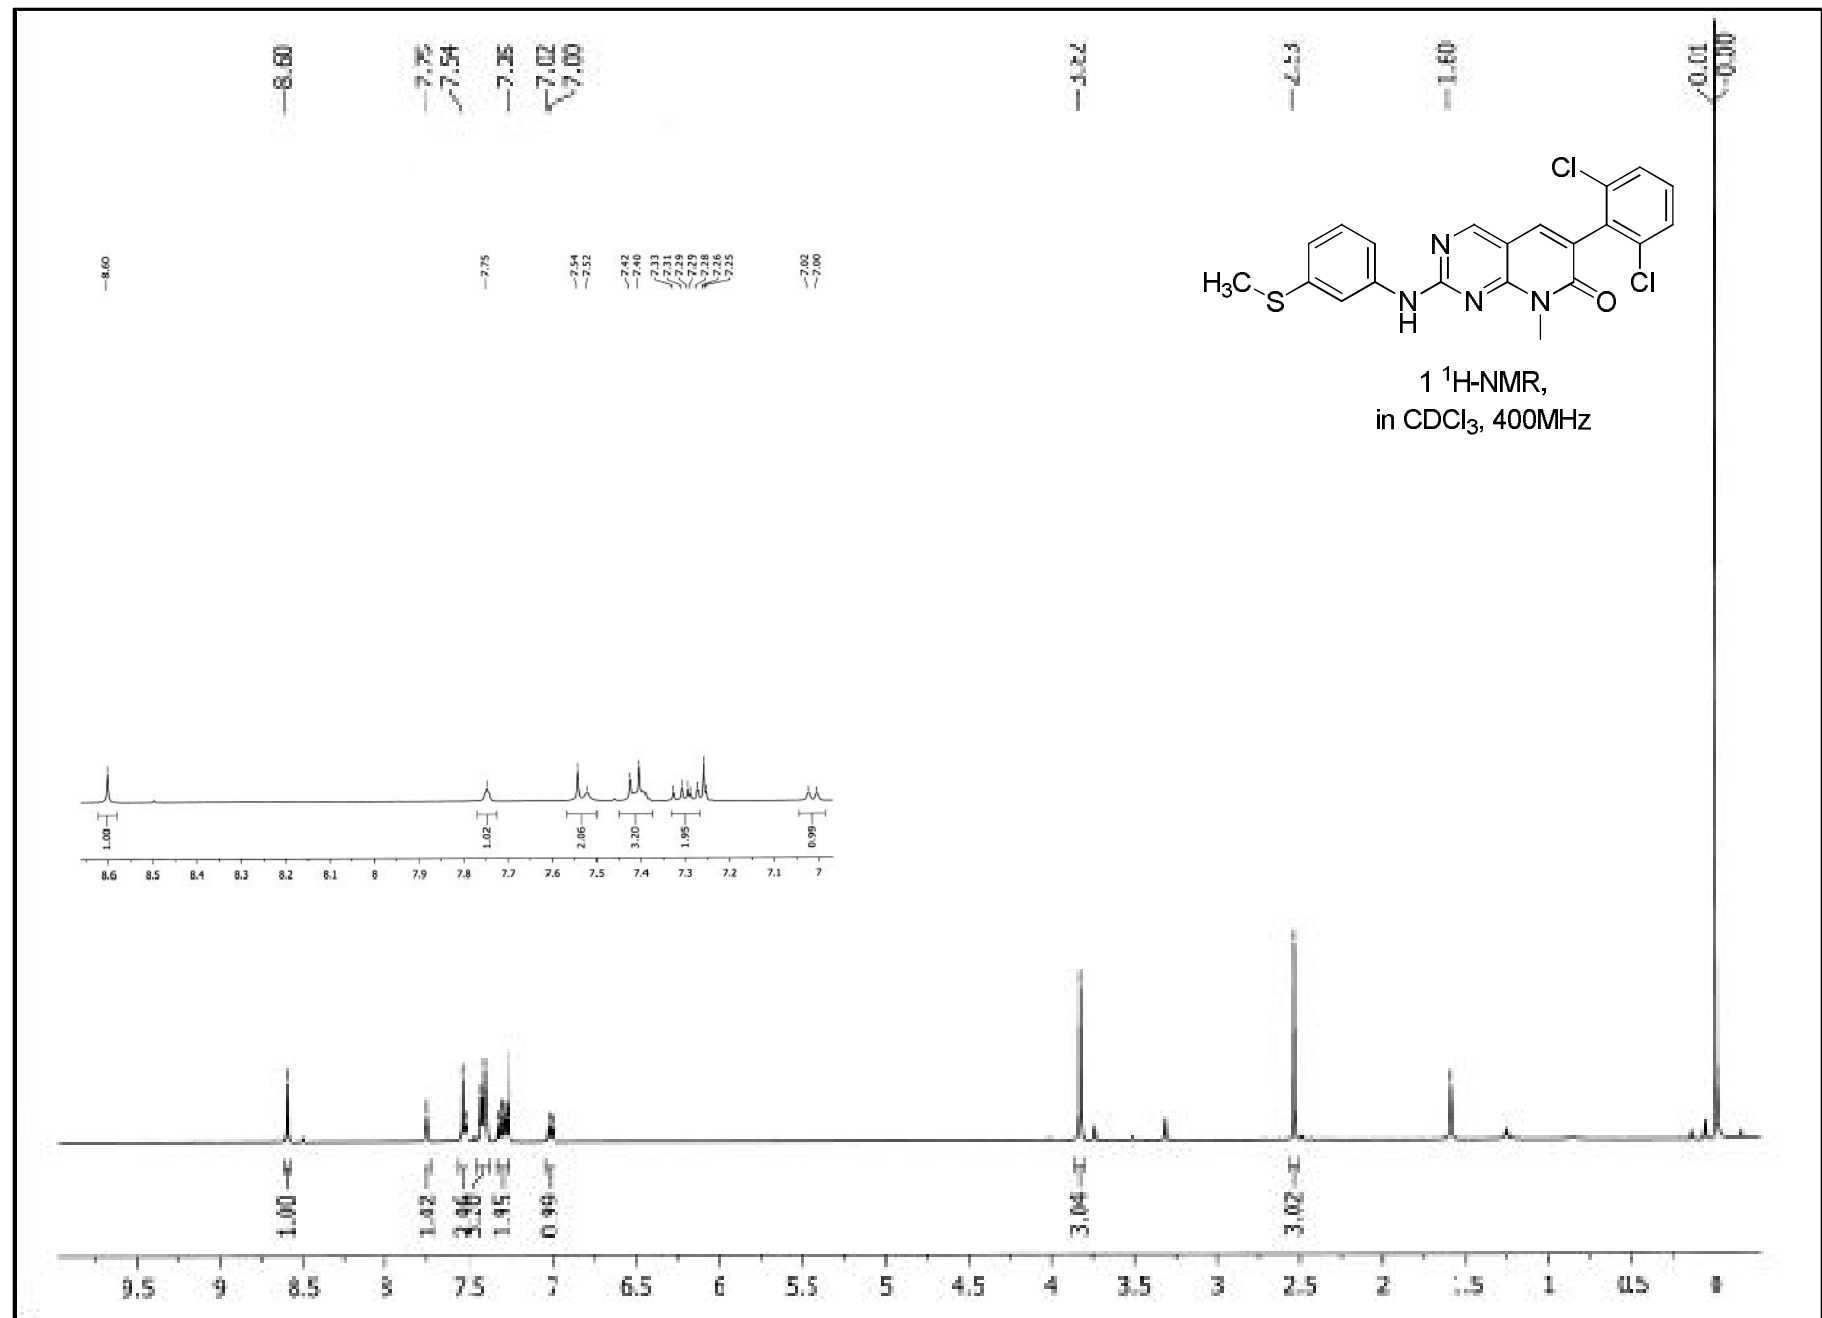

Supplement: NIHMS223453-supplement-01.pdf [file NIHMS223453-supplement-01.pdf]
